# Supplementary material for: A single-cell transcriptome atlas of pig skin characterizes anatomical positional heterogeneity
Source: eLife. 2023 Jun 5;12:e86504. doi: 10.7554/eLife.86504 (PMC10241519; doi:10.7554/eLife.86504)
Supplement: Figure 1—figure supplement 1—source data 1. [file elife-86504-fig1-figsupp1-data1.xlsx]

## Sheet: Gene count
Figure 1—figure supplement 1A—Source data 1
The average gene count of six different skin regions in Chenghua pig
Samples	Head	Ear	Back	Shoulder	Abdomen	Leg
Sample-1	1042	1021	791	1055	1062	1073
Sample-2	972	997	1043	1104	1138	998
Sample-3	917	742	744	801	848	864

## Sheet: UMI count
Figure 1—figure supplement 1B—Source data 1
The average UMI count of six different skin regions in Chenghua pig
Samples	Head	Ear	Back	Shoulder	Abdomen	Leg
Sample-1	3498	3188	2037	2838	3056	2945
Sample-2	2720	2668	2846	2944	3134	2645
Sample-3	2726	1948	2376	2261	2227	2310
