# Supplementary material for: A single-cell transcriptome atlas of pig skin characterizes anatomical positional heterogeneity
Source: eLife. 2023 Jun 5;12:e86504. doi: 10.7554/eLife.86504 (PMC10241519; doi:10.7554/eLife.86504)
Supplement: Figure 1—source data 1. [file elife-86504-fig1-data1.xlsx]

## Sheet: Marker genes
Figure 1C—Source data
Marker genes of all clusters in Chenghua pig skin
Gene Symbol	0 cluster （log2fc）	1 cluster（log2fc）	2 cluster（log2fc）	3 cluster（log2fc）	4 cluster（log2fc）	5 cluster（log2fc）	6 cluster（log2fc）	7 cluster（log2fc）	8 cluster（log2fc）	9 cluster（log2fc）	10 cluster（log2fc）	11 cluster（log2fc）	12 cluster（log2fc）	13 cluster（log2fc）	14 cluster（log2fc）	15 cluster（log2fc）	16 cluster（log2fc）	17 cluster（log2fc）	18 cluster（log2fc）	19 cluster（log2fc）	20 cluster（log2fc）
'MYH11'	2.12423	0	0	0	0	0	0	0	0	0	0	0	0	2.27206	0	0	0	0	0	0	0
'DSTN'	1.91843	0	0	0	0	0	0	0	0	0	0	0	0	1.57604	0	0	0	0	0	0	0
'ITIH4'	1.76813	0	0.332922	0	0	0	0	0	0	0	0	0	0	1.2998	0	0	0	0	0	0	0
'ADIRF'	1.7668	0	0	0	0	0	0	0	0	0	0	0	0	1.26951	0	0	0	0	0	0	0.284154
'S1PR3'	1.68649	0	0	0	0	0	0	0	0	0	0	0	0	0	0	0	0	0	0	0	0
'BCAS2'	1.57038	0	0	0	0	0.394499	0	0	0	0	0	0	0	0	0	0.422765	0	0	0	0	0
'VCAM1'	1.54563	0	0	0	0	0	0.263051	0	0	0	0	0	0	0.301798	0	0	0	0	0	0	0
'ACTA2'	1.49978	0	0.618478	0	0	0	0	0	0	0	0	0	0	2.2814	0	0	0	0	0	0	0
RGS5'	1.48219	0	0	0	0	0	1.38082	0	0	0	0	0	0	0	0	0	0	0	0	0	0
'TGFB3'	1.41281	0	0	0	0	0	0.335864	0	0	0	0	0	0	0.334368	0	0	0	0	0	0	0
'ARF4'	1.40335	0	0	0	0	0	0	0	0	0	0	0	0	0	0	0	0	0	0	0	0
'KCNA5'	1.39792	0	0	0	0	0	0	0	0	0	0	0	0	0	0	0	0	0	0	0	0
'SPARCL1'	1.37055	0	0.435019	0	0	0	0	0	0	0	0	0	0	1.81053	0	0	0	0	0	0	0
C2H11orf96'	1.35244	0	0.824835	0	0	1.01807	0	0	0	0	0	0	0	0	0	0	0	0	0	0	0
'CYCS'	1.34396	0	0	0	0	0.782687	0.481324	0	0	0	0	0	0	0	0	0	0	0	0	0	0
RASD1'	1.31488	0	0.424179	0	0	0.949642	0.857276	0	0	0	0	0	0	0	0	0	0	0	0	0	0
'TPM1'	1.31196	0	0.299935	0	0	0	0.357921	0	0	0	0	0	0	1.64567	0	0	0	0	0	0	0
'LMOD1'	1.28982	0	0.544251	0	0	0	0	0	0	0	0	0	0	1.69334	0	0	0	0	0	0	0
'FHL5'	1.26858	0	0.530903	0	0	0.457892	0	0	0	0	0	0	0	0.5527	0	0	0	0	0	0	0
'LOC100127131'	1.24494	0	0	0	0	0	0	0	0	0	0	0	0	0	0	0	0	0.43466	0	0.667871	0
'SYNM'	1.22108	0	0	0	0	0	0	0	0	0	0	1.21225	0	1.35229	0	0	0	0	0	0	0
RGS16'	1.21193	0	0.726344	0	0	1.17056	0.398293	0	0	0	0	0	0	0	0	0	0	0	0	0	0
'TPM2'	1.11927	0	0.579891	0	0	0	0.341809	0	0	0	0	0	0	2.32181	0	0	0	0	0	0	0
'HSPB8'	1.10343	0	0	0	0	0	0	0	0	0	0	0.643316	0	0.349521	0	0	0	0	0	0	0
'ITGA8'	1.068	0	0	0	0	0	0	0	0	0	0	0	0.370511	0	0	0	0	0	0	0	0
'CRYAB'	1.04084	0	0.457494	0	0	0	0	0	0	0	0	0	0	0.590882	0	0	0	0	0	0	1.09075
'MAP3K7CL'	1.02372	0	0	0	0	0	0.358924	0	0	0	0	0	0	0	0	0	0	0	0	0	0
'PCP4L1'	1.01621	0	0	0	0	0	0	0	0	0	0	0	0	0.447089	0	0	0	0	0	0	0
'RRAD'	0.991831	0	0.465648	0	0	0.329899	0.364844	0	0	0	0	0	0	0.9788	0	0	0	0	0	0	0
'ID3'	0.972413	0	0	0.374958	0	0	0	0.333127	0	0	0	0	0	0	0	0	0	0	0	0	0.664394
'TM4SF1'	0.943119	0	0	0.322092	0	0.38224	0.424877	0.354568	0	0	0	0	0	0	0	0	0	0	0	0	0
'AVPR1A'	0.92639	0	0.421774	0	0	0.765717	0	0	0	0	0	0	0	0	0	0	0	0	0	0	0
'TCAP'	0.926108	0	0	0	0	0	0	0	0	0	0	0	0	0	0	0	0	0	0	0	0
'CSRP2'	0.917793	0	0	0	0	0.40425	0	0	0	0	0	0	0	0	0	0	0	0	0	0	0
'KLHL23'	0.906284	0	0	0	0	0	0	0	0	0	0	0	0	0	0	0	0	0	0	0	0
'BTG2'	0.876031	0	0	0.967868	0.323509	0	0	1.1925	0	0	0	0	0	0	0	0	0	0	0	0	0
ADAMTS4'	0.856365	0	0.329503	0	0	1.35965	0.93927	0	0	0	0	0	0	0	0	0	0	0	0	0	0
'ADAMTS1'	0.818724	0	0.341313	0	0	0.532965	0	0	0	0	0	0	0	0	0	0	0	0	0	0	0
'TIMP1'	0.790844	0	0	0	0	0.261894	0.686159	0	0	0	0	0	0	0	1.27683	0	0	0	0	0	0
'RELL1'	0.783995	0	0	0	0.455895	0	0	0.400912	0	0	0	0	0	0.460761	0	0	0	0	0	0	0
MYLK'	0.763003	0	0.918777	0	0	0.531264	0.345531	0	0	0	0	0	0	1.92533	0	0	0	0	0	0	0
'CASQ2'	0.760448	0	0	0	0	0	0	0	0	0	0	0	0	0.563442	0	0	0	0	0	0	0
'FILIP1'	0.731659	0	0	0.514277	0	0	0	0.763229	0	0	0.25274	0	0	0.293402	0	0	0	0	0	0	0
'CNN1'	0.719419	0	0	0	0	0	0	0	0	0	0	0	0	1.79645	0	0	0	0	0	0	0
'UACA'	0.706054	0	0	0	0.262144	0	0	0	0	0	0	0	0	0	0	0	0	0	0	0	0
'REL'	0.704848	0	0	0	0	0.351099	0	0	0	0	0	0	0	0	2.07762	1.43462	0.628294	0	0.879968	0	0
'INSIG1'	0.682854	0	0	0	0	0	0	0	0	0	0	0	0	0	2.00515	0	1.11606	0	1.49615	0	0
'ARL5B'	0.660738	0	0	0.328024	0	0.409952	0	0.865514	0	0	0	0	0	0	0	0	0	0	0	0	0
'RIMKLB'	0.657502	0	0	0	0	0	0	0	0	0	0	0	0	0	0	0	0	0	0	0	0
'CREM'	0.654145	0	0	0	0	0.413993	0	0	0	0	0	0	0	0	0.84429	1.84127	0.368812	0	0	0	0
'NOV'	0.631621	0	0	0	0	0	0	0	0	0	0	1.63335	0	0	0	0	0	0	0	0	0
'PAK1'	0.626221	0	0	0	0	0	0	0	0	0	0	0	0	0.318056	0.688224	0	0.839208	0	0	0	0
'CCDC14'	0.624446	0	0	0	0	0	0.261659	0	0	0	0	0	0	0	0	0	0	0	0	0	0
'PLCE1'	0.62213	0	0	0	0	0	0	0	0	0	0	0	0	0	0	0	0	0	0	0	0
'SQLE'	0.621106	0	0	0	0	0	0	0	0	0	0	0	0	0	0.587906	0	0	0	0	0	0.342386
'SLC2A9'	0.611464	0	0	0	0	0	0	0	0	0	0	0	0	0	0	0	0	0	0	0	0
SYNPO2'	0.595095	0	1.19406	0	0	0.600494	0.536032	0	0	0	0	0	0	0.446985	0	0	0	0	0	0	0
'CXCL2'	0.586516	0	0	0	0	1.57894	0.74493	0	0	0	0	0	0	0	0	0	0	0	0	0	0
'SGTB'	0.584016	0	0	0	0	0	0	0	0	0	0	0	0	0	0	0	0	0	0	0	0
'NR4A3'	0.577104	0	0	0	0	0.392828	0.288318	0	0	0	0	0	0	0	1.6267	0.788676	0	0	0	0	0
'PRPF4B'	0.574188	0	0	0	0	0.346651	0	0	0	0	0	0	0	0	0	0.352867	0	0	0	0	0
'COL4A6'	0.564226	0	0.329447	0	0	0	0	0	0	0	0	0	0	0.598085	0	0	0	0	0	0	0
'MYOM1'	0.548676	0	0.382794	0	0	0	0	0	0	0	0	0	0	0.51047	0	0	0	0	0	0	0
'RUFY2'	0.547163	0	0	0	0	0	0	0	0	0	0	0	0	0	0	0	0	0	0	0	0
'FAM129A'	0.545995	0.511238	0	0	0	0	0	0	0	0	0	0	0	0	1.57204	1.77263	0.433024	0	0	0	0
'DMXL2'	0.527878	0	0	0	0	0	0	0	0	0	0	0	0	0	0	0	0	0	0	0	0
'PDE3A'	0.523978	0	0.346633	0	0	0	0	0	0	0	0.398902	0	0	0	0	0	0	0	0	0	0
'KCNAB1'	0.522018	0	0.358875	0	0	0	0	0	0	0	0.286963	0	0	0.502216	0	0	0	0	0	0	0
'IL2RA'	0.518366	0	0	0	0	0.496247	0.64475	0	0	0	0	0	0	0.433077	0	1.38884	0	0	0	0	0
'CDH6'	0.507961	0	0.308898	0	0	0	0	0	0	0	0	0	0	0	0	0	0	0	0	0	0
'PTPN1'	0.502084	0	0	0	0	1.12617	0.568472	0	0	0	0	0	0	0	0	0	0	0	0	0	0
'SNTB1'	0.5016	0	0	0	0	0	0	0	0	0	0	0	0	0	0	0	0	0	0	0	0.47507
'ACTG2'	0.487629	0	0	0	0	0	0	0	0	0	0	0	0	1.85028	0	0	0	0	0	0	0
'NEXN'	0.472828	0	0	0	0	0	0	0	0	0	0	0.574886	0	1.26973	0	0	0	0	0	0	0
'PRDM1'	0.469536	0	0	0.558234	0	0	0	0	0	0	0	0	0	0	0.37886	0	0.399569	0	0	0	0
'ODC1'	0.460702	0	0	0	0	0.609473	0.304809	0	0	0	0	0	0	0	1.41353	0.53881	0.743101	0	0.725129	0	0
'FAM107B'	0.443274	0	0	0	0	0	0	0	0	0	0	0.929799	0	0	1.00275	1.42958	0	0	1.81128	0	0
'GRAMD2B'	0.438968	0	0	0	0	0.265121	0.289081	0	0	0	0	0	0	0	0	0	0	0	0	0	0
'P3H2'	0.437653	0	0.313478	0	0	0.729602	0.286678	0	0	0	0	0	0	0	0	0	0	0	0	0	0
'NR4A2'	0.43435	0	0	0	0	0	0	0	0	0	0	0	0	0	1.57712	2.20057	0.767945	0	0.967878	0	0.731973
'GRK5'	0.433161	0	0	0	0	0	0.305213	0	0	0	0.795993	0	0	0	0	0	0	0	0	0	0
'JMY'	0.427586	0	0	0	0	0	0	0	0	0	0	0.472408	0	0	0	0.888356	0	0	0	0	0
'CYP51'	0.422239	0	0	0	0	0	0	0	0	0	0	0	0	0	0.472311	0	0	0	0	0	0
'ANGPT2'	0.413718	0	0.340807	0	0	0.347648	0.48149	0	0	0	0	0.549536	0	0	0	0	0	0	0	0	0
'CHMP4C'	0.389212	0	0	0	0	0	0	0	0	0	0	0	0	0	0	0	0	0	0	0	0
'PPP1R9A'	0.356683	0	0	0	0	0	0	0	0	0	0	0.548748	0	0	0	0	0	0	0	0	0
'SLC8A1'	0.354877	0	0	0	0	0	0	0.324528	0	0	0.819354	0	0	0	0	0	0.411689	0	0.369357	0	0
'TMOD1'	0.351292	0	0	0	0	0	0	0	0	0	0	0	0	0.412964	0	0	0	0	0	0	0
'SOX6'	0.346023	0	0	0	0	0	0	0	0	0	0.461331	0	0	0	0	0	0	0	0	0	0
'ANO3'	0.339865	0	0	0	0	0	0	0	0	0	0.436743	0	0	0	0	0	0	0	0	0	0
'FILIP1L'	0.336981	0	0.68611	0	0	0.590388	0.301631	0	0	0	0.301752	0	0	0	0	0	0	0	0	0	0
'UTP3'	0.333753	0	0	0	0	0	0	0	0	0	0	0	0	0	0	0	0	0	0	0	0
'PPP1R14A'	0.323524	0	0.260722	0	0	0	0	0	0	0	0	0	0	1.87973	0	0	0	0	0	0	0
'RYR2'	0.317619	0	0.372932	0	0	0.343519	0	0	0	0	0.366702	1.01074	0	0	0	0	0	0	0	0	0
'LOC100154105'	0.296472	0	0	0	0	0	0	0	0	0	0	0	0	0	0	0	0	0	0	0	0.307871
'ARHGAP44'	0.294326	0	0	0	0	0	0	0	0	0	0	0	0	0	0	0	0	0	0	0	0
'ATF3'	0.286494	0	0	0.427854	0	0	0	0.956101	0	0	0	0	0	0	0	0	0.68123	0	0	0	0
'DNAJC9'	0.286444	0	0	0	0	0	0	0	0	0	0	0	0	0	0	0	0	0	0	0.278566	0
'AFAP1L2'	0.282567	0	0.338428	0	0	0.686751	0.479855	0	0	0	0	0	0	0	0	0	0	0	0	0	0.615686
'DGKG'	0.281877	0	0	0	0	0	0	0	0	0	0	0	0	0	0.441365	0	0	0	0	0	0
'FHAD1'	0.279987	0	0	0	0	0	0	0	0	0	0	0	0	0	0	0	0	0	0	0	0
'HABP4'	0.276462	0	0	0	0	0	0	0	0	0	0	0	0	0	0	0	0	0	0	0	0
'BTBD11'	0.273064	0	0	0	0	0	0	0	0	0	0.359401	0	0	0	0	0	0	0	0	0	0
'RNMT'	0.264853	0	0	0	0	0	0	0	0	0	0	0	0	0	0	0	0	0	0.269538	0	0
'TXNRD1'	0.26311	0	0	0	0	0.655853	0.497775	0	0	0	0	0	0	0	0.584794	0	0	0	0	0	0
'S1PR5'	0.260512	0	0	0	0	0	0.300771	0	0	0	0	0	0	0	0	0	0	0	0	0	0
'ALCAM'	0.252924	0	0	0	0	0	0	0	0	0	0.251206	0	0	0	1.50492	0	1.22013	0	0	0	0
'EGFL8'	0	0	0	0	0	0	0	0.276885	0	0	0	0	0	0	0	0	0	0	0	0	2.64065
'S100B'	0	0	0	0.314473	0	0	0	1.53005	0	0	0	0.614141	0	0	0	0	0	0	0	0	2.39891
'MBP'	0	0	0	0	0	0	0	0	0	0	0	0	0	0	0.814386	0.510341	0.449929	0	0.486221	0	2.26285
'CHL1'	0	0	0	0	0	0	0	0	0	0.672897	0	0	0	0	0	0	0	0.720777	0	0	2.20724
'NCMAP'	0	0	0	0	0	0	0	0	0	0	0	0	0	0	0	0	0	0	0	0	2.18435
'APOA1'	0	0	0	1.83531	0.670489	0	0	1.83668	0	0	0	0	0	0	0	0	0	0	0	0	2.03468
'MATN2'	0	0	0	0	0.375684	0	0	0	0	0	0.28403	0	0.414456	0.467019	0	0	0	0	0	0	2.02411
'NDNF'	0	0.442743	0	0	0	0	0	0	0.592589	0.581082	0	0	0.74998	0	0	0	0	0	0	0	1.89457
'FGL2'	0	0	0	0	0.545408	0	0	0.419309	0	1.44014	0	0	0	0	0.85788	0	0.546557	0	0	0	1.79313
'RELN'	0	0	0	0	0	0	0	0	0	0	0.414598	1.46636	0	0	0	0	0	0	0	0	1.58861
'SCN7A'	0	0	0	0	0	0	0	0	0	0	0	0	0	0	0	0	0	0	0	0	1.57879
'GFRA3'	0	0	0	0	0	0	0	0	0	0	0	0	0	0	0	0	0	0	0	0	1.5683
'APOD'	0	0	0	0	0	0	0.933746	0	0	2.15363	0	0	1.18492	0	0	0	0	0	0	0	1.55916
'CADM1'	0	0	0	0	0	0	0	0	0	0	0.47864	0	0.266342	0	0.310959	0	0.736322	0.280209	0	0	1.55205
'GFRA1'	0	0	0	0	0	0	0	0	0	0.284749	0	0	0.653462	0	0	0	0	0.331994	0	0	1.52002
'CXCL14'	0	0	0	0.439345	0	0	0	0	1.33331	1.15482	0	0	1.45456	0	0	0	0	1.32153	0	0	1.50466
'NGFR'	0	0	0.274409	0	0	0	0	0	0	0	0	0	0	0	0	0	0	0	0	0	1.49971
'IQGAP2'	0	0	0	0	0	0	0	0	0	0.728747	0	0	0.915945	0	0	0.57332	1.0445	0.558458	0	0	1.4657
'LAMB1'	0	0.545658	0	0	0	0	0	0	0.828927	1.22668	0	0.612012	1.1332	0	0	0	0	0.337123	0	0.492502	1.44993
'ANK3'	0	0	0	0	0	0	0	0	0	0	0.336144	0	0	0	0	0	0	0.562892	0	0	1.40215
'LIMCH1'	0	0.43896	0	0	0	0	0	0	0.353423	0.405686	0	0.575683	0.399966	0	0	0	0	0	0	0	1.38355
'SPP1'	0	0	0	0	0	0	0	0	0	0	0	0	0.314799	0	0.505202	0.31848	0.915948	0.505634	0	0	1.38269
'CDH19'	0	0	0	0	0	0	0	0	0	0	0	0	0	0	0	0	0	0	0	0	1.33797
'SCRG1'	0	0	0	0	0	0	0	0	0	0	0	0	0	0	0	0	0	0.36323	0	0	1.20524
'CD200'	0	0	0	0	0	0	0	0	0	0	0	0	0	0	0	0	0	0.46365	0	0	1.18154
'KIF21A'	0	0	0	0	0	0	0	0	0	0	0	0.383659	0	0	0	0	0	0.565256	0	0	1.17067
'SFRP1'	0	0	0	0	0	0	0	0	0.283006	0	0	0	1.63019	0	0	0	0	0.431627	0	0	1.15175
'SCD'	0	0	0	0	0	0	0	0	0	0	0	0	0	0	0	0	0	2.02781	0	0	1.13237
'XKR4'	0	0	0	0	0	0	0	0	0	0	0	0	0	0	0	0	0	0	0	0	1.12058
'ERBB3'	0	0	0	0	0	0	0	0	0	0.317139	0	0	0	0	0	0	0	0.515898	0	0	1.1167
'SOX4'	0	0	0	0	0	0	0	0	0	0	0.301539	1.09529	0	0	0	0	0	0.885761	0	0	1.11361
'ANXA8'	0	0.539686	0	0	0	0	0	0	0	0	0	0	0	0.319141	0	0	0	0.877954	0	0	1.07395
'BASP1'	0	0	0	0	0	0	0	0	0	0.300943	0	0	0	0	0.89018	0.464809	0	0.478604	0	0	1.02638
'SNCA'	0	0	0	0	0	0	0	0	0	0	0	0	0	0	0	0	0	0	0	0	1.01602
'CADM3'	0	1.13266	0	0	0	0	0	0	0.591382	1.06666	0	0	0.306933	0	0	0	0	0	0	0	0.985264
'SEMA3G'	0	0	0	0.534455	0	0	0	2.14819	0	0	0	0	0	0	0	0	0	0	0	0	0.985179
'THBS4'	0	0	0	0	0	0	0	0	0	0	0	0	0.395046	0	0	0	0	0	0	0	0.947717
'FXYD6'	0	0	0	0.317271	0.448023	0	0	1.71025	0	0	0	0	0	0	0.305115	0	0.311864	0	0.806957	0.309771	0.939842
'BCL2'	0	0	0	0	0	0	0	0	0	0	0	0	0.493746	0	0	0.746662	0	0	0	0.254412	0.93942
'C3'	0	0	0	0	0	0	0	0	0	1.72686	0	0	0.554864	0	0	0	0	0.54729	0	0	0.89753
'S100A1'	0	0	0	0	0	0	0	0	0	0	0	0	0	0	0	0	0	0.606638	0	0	0.895478
'ARHGEF26'	0	0	0.484397	0	0	0	0	0	0	0	0	0	0.275787	0.295088	0	0	0	0	0	0	0.877524
'GSAP'	0	0	0	0	0	0	0	0	0	0	0	0	0	0	0.478385	0	0	0	0	0	0.874119
'C4A'	0	0	0	0	0	0	0	0	0	2.6208	0	0	0	0	0	0	0	0	0	0	0.844129
'CPXM2'	0	0	0	0	0	0	0	0	0.697565	0.573138	0	0	0	0	0	0	0	0	0	0	0.761426
'S100A4'	0	0	0	0	0	0	0.731086	0	1.56026	0.830272	0	0	0.700317	0	0.388013	0.74682	0	0	0	0.685207	0.752115
'PDE1C'	0	0	0	0	0	0.261764	0.690696	0	0	0	0.418171	0	0	0	0	0	0	0	0	0	0.749981
'CLU'	0	0	0	0	0	0	0	1.21259	0	1.76336	0	0	1.36231	0	0	0	0	0	0	0	0.740328
'NES'	0	0	0	0	0	0.538214	0.611203	0	0	0	0	0	0	0	0	0	0	0	0	0.280926	0.735807
'C17H8orf4'	0	0	0	0.608787	0	0.468211	0.531252	0	0	0	0	0	0	0	0	0	0	0	0	0	0.728341
'PLXDC2'	0	0.768494	0	0	0	0	0	0	0.342601	0.741208	0	0	0	0	0.524262	0	0	0	0	0	0.691603
'IGFBP6'	0	1.13553	0	0	0	0	0	0	0.616135	1.24679	0	0	1.66549	0	0	0	0	0	0	1.6946	0.691366
'NRXN1'	0	0	0	0	0	0	0	0	0	0	0.69334	0	0	0	0	0	0	0	0	0	0.678025
'GNG2'	0	0	0.314175	0	0	1.02894	0	0	0	0	0	0	0	0	0.860333	1.05467	0.629099	0	0	0	0.677452
'PCDH17'	0	0	0	0.809619	0.611203	0	0	0.368025	0	0	0.878559	0.598888	0	0	0	0	0	0	0	0	0.675126
'LOC100512003'	0	0	0	0	0	0	0	0	0	0	0.293951	0	0	0	0	0	0	0	0	0	0.668963
'TTC3'	0	0.3931	0	0	0	0	0	0	0.397371	0.390998	0	0	0.55281	0	0	0	0	0	0	0	0.667053
'ADAMTS20'	0	0	0	0	0	0	0	0	0	0	0	0	0	0	0	0	0	0	0	0	0.657984
'NCAM1'	0	0.279418	0	0	0	0	0	0	0.587594	0.580695	0	0	0.447563	0	0	0	0	0	0	0.815562	0.653259
'TGFBI'	0	1.02448	0	0	0	0	0	0	0	0	0	0	0.657883	0	0.605299	0	1.28979	0	0	0.317282	0.645515
'PDK4'	0	0	0	0.651632	0.353503	0	0	0.771801	0	0.50357	0	0	0	0	0	0	0	0	0	0	0.634988
'S100A14'	0	0.531438	0	0	0	0	0	0	0	0.436741	0	0	0	0	0	0	0	1.53386	0	0	0.613253
'AQP1'	0	0	0	1.35433	1.03469	0	0	0.25374	0.328781	0	0	0	0	0	0	0	0	0	0	0.281879	0.60795
'SERINC5'	0	0	0	0	0	0	0	0	0	0	0.732343	0.513282	0	0	0	0	0	0.32472	0	0	0.602307
'PTGDS'	0	0	0	0	0	0	0	0	0	0.358347	0	0	1.28379	0	0	0	0	0	0	0	0.598637
'SEMA3C'	0	1.8256	0	0	0	0	0	0	0	0	0	0	0	0	0	0	0	0	0	0	0.597204
'GPX3'	0	0.364193	0	0	0	0	0	0	0	0	0	0	0	0	0	0	0	0	0	0	0.593415
'LRRTM4'	0	0	0	0	0	0	0	0	0	0	0.700407	0	0	0	0	0	0	0	0	0	0.565711
'PRR18'	0	0	0	0	0	0	0	0	0	0	0	0	0	0	0	0	0	0	0	0	0.552322
'DAB1'	0	0	0	0	0	0	0	0	0	0	0.801457	0	0	0	0	0	0	0	0	0	0.540832
'BCAS1'	0	0	0	0	0	0	0	0	0	0	0	0	0	0	0	0	0	0	0	0	0.536839
'HBEGF'	0	0	0	0.591888	0	0	0	0	0	0	0	0	0	0	1.38589	0.314661	0	0	0	0	0.536686
'HSP70.2'	0	0	0	0	0	0	0	0.497556	0.360279	0	0	0.888945	0	0	0	0	1.47138	0	0.348614	0	0.534223
'PPP2R3A'	0	0	0	0	0	0	0	0	0.285471	0	0.564839	0	0.29238	0	0	0	0	0	0	0	0.526983
'PSAT1'	0	0.43108	0	0	0	0	0	0	0	0	0	0	0	0	0	0	0	1.10316	0	0	0.503431
'DRP2'	0	0	0	0	0	0	0	0	0	0	0	0	0	0	0	0	0	0	0	0	0.493081
'ZNF827'	0	0	0	0	0	0	0	0	0	0	0.250797	0	0	0	0	0	0	0	0	0	0.49296
'HMGB2'	0	0	0	0	0	0	0	0	0	0	0	0.368622	0	0	0	0	0	0.261813	0.324488	2.37889	0.489157
'FMNL2'	0	0	0	0	0	0	0	0	0	0.251811	0.3701	0	0.284346	0	0	0	0	0.340476	0	0	0.486951
'PALMD'	0	0	0	0.95856	0.966635	0	0	1.11682	0	0	0.527738	0	0	0	0	0	0	0	0	0	0.486306
'TUBB2B'	0	0	0	0	0	0	0	0	0	0	0	0	0.303765	0	0	0.306351	0	0	0	0	0.482768
'ANKRD44'	0	0	0	0	0	0	0	0	0	0	0.382474	0	0	0	0.416166	0.371502	0	0	0	0	0.47962
'S100A6'	0	0.802142	0	0	0	0	0	0	0.456552	0.799783	0	0	0.446335	0.902435	0	0	0	0	0	0.736921	0.478164
'FST'	0	0.277575	0	0	0	0	0	0	0.671251	0	0	0	0	0	0	0	0	0	0	0	0.467463
'FMOD'	0	0	0.257895	0	0	0	0	0	0	0	0	0	0.967467	0.578672	0	0	0	0	0	0.289886	0.456009
'PRSS23'	0	0	0	0.571531	0.285681	0	0	0	0	0	0	1.09169	0	0	0	0	0	0	0	0	0.437925
'PCDH9'	0	0	0	0	0	0	0	0	0	1.49737	0.43607	0	0.657174	0	0	0	0	0	0	0	0.435876
'CHD7'	0	0	0	0.652333	0.467673	0	0	0.265262	0	0	0.700111	0.477077	0	0	0	0	0	0	0	0	0.431594
'LHFPL2'	0	0.642918	0	0	0	0	0	0	0.638576	0.459981	0.284471	0	0.579401	0	0	0	0	0	0	0	0.429482
'ATP1B1'	0	0	0	0	0	0	0	0	0	0	0	0	0	0	0.790152	0.55779	0.674727	0.404028	0	0	0.423179
'GRIK2'	0	0	0	0	0	0	0	0	0	0	0.423225	0	0	0	0	0	0	0	0	0	0.421691
'LOC100738003'	0	0	0	0	0	0	0	0	0	0.451166	0	0	0.349943	0	0	0	0	0	0	0	0.419302
'COL11A1'	0	0	0	0	0	0	0	0	0	0	0	0	0.880941	0	0	0	0	0	0	0	0.417523
'BNC2'	0	0	0	0	0.519928	0	0	0	0	0	0.752695	0	0	0	0	0	0	0.466105	0	0	0.413623
'DUSP6'	0	0	0	0.384925	0.527112	0	0	0	0	0.437324	0	0.690938	0	0	0	0	0.486296	0	0.615579	0	0.412693
'THY1'	0	1.09205	0	0	0	0	0	0	1.03877	0.87631	0	0	1.25931	0	0	0	0	0	0	0.414512	0.410652
'TMEM178B'	0	0	0	0	0	0	0	0	0	0	0.381357	0	0	0	0	0	0	0	0	0	0.407445
'THSD7A'	0	0	0	0	0	0	0	0.364483	0	0	0.504949	0	0	0	0	0	0	0	0	0	0.407307
'INHBA'	0	0	0	0	0	0	0	0	0	0	0	0	0.976007	0	0	0	0	0	0	0	0.397281
'DNAJB1'	0	0	0	0.365034	0.320781	0	0	0.838184	0	0	0	0.411986	0	0	0	0	1.13427	0	0.862095	0	0.392491
'GRIA4'	0	0.3359	0	0	0	0	0	0	0	0	0.415265	0	0	0	0	0	0	0	0	0	0.386163
'ARHGAP39'	0	0	0	0	0	0	0	0	0	0	0	0	0	0	0	0	0	0	0	0	0.38489
'BORCS7'	0	0	0	0	0	0	0	0	0	0	0	0	0	0	0	0	0	0	0	0	0.373107
'BACH2'	0	0	0	0	0	0	0	0	0	0	0.579874	0	0	0	0.827612	0.566634	0	0.656466	0	0	0.368568
'GPR137B'	0	0	0	0	0	0	0	0	0	0	0	0	0	0	1.0652	0	0.422259	0	0.949147	0	0.366822
'C3H2orf40'	0	0	0	0	0	0	0	0	0	0	0	2.18016	0	0	0	0	0	0	0	0	0.36659
'MRPS6'	0	0	0	0	0	0	0	0	0	0	0	0	0	0	0.795147	0.47218	0.625139	0	0	0	0.364704
'KIAA1217'	0	0	0	0.296025	0	0	0	0	0	0	0.662995	0.320598	0	0	0	0	0	0.39581	0	0	0.360445
'EGR2'	0	0	0	0.373688	0.318069	0	0	0.649212	0	0	0	0	0.357898	0	0	0	0	0.328838	0.981559	0	0.356641
'SQSTM1'	0	0	0	0.342815	0	0	0	0.364349	0	0	0	0	0	0	1.04379	0.84126	1.22429	0	0.718243	0	0.352369
'ADGRB3'	0	0	0	0	0	0	0	0	0	0	0.541323	0	0	0	0	0	0	0.258475	0	0	0.34715
'TMTC2'	0	0	0	0	0.630888	0	0	0	0	0	1.04602	0	0	0	0	0	0	0	0	0	0.340156
'MACROD2'	0	0	0	0	0	0	0	0	0	0	1.14901	0.337202	0	0	0	0	0	0.279429	0	0	0.335395
'FAM13B'	0	0	0	0	0	0	0	0	0	0	0	0	0	0	0	0	0	0	0	0.272438	0.330993
'MAP1A'	0	0.364246	0	0	0	0	0	0	0.356513	0.651685	0	0	0.783926	0	0	0	0	0	0	0	0.326347
'PHF6'	0	0	0	0	0	0	0	0	0	0	0	0	0	0	0	0	0	0	0	0	0.32436
'SCG3'	0	0	0	0	0	0	0	0	0	0	0	2.08435	0	0	0	0	0	0	0	0	0.319351
'ITGA6'	0	0	0	0.688666	1.03298	0	0	0.538296	0	0	0.867005	0.349106	0	0	0	0	0	0.355498	0	0	0.316594
'FBLN2'	0	1.07342	0	0	0.37346	0	0	0.587062	0.613619	0.612987	0	0	0.829444	0	0	0	0	0	0	0.350625	0.316281
'CEP350'	0	0	0	0	0	0	0	0	0	0	0	0	0	0	0	0	0	0	0	0	0.314822
'ECM1'	0	1.07922	0	0	0	0	0	0	0.508645	0.99065	0	0	0	0	0	0	0	0	0	0.79839	0.307984
'DCLK1'	0	0.285006	0	0	0	0	0	0	0.894123	0.48673	0	0	0.431184	0	0	0	0	0	0	0.644357	0.306077
'PHIP'	0	0	0.272547	0	0	0	0	0	0	0	0.330259	0	0	0	0	0	0	0.612738	0	0	0.303516
'FAM46A'	0	0.782666	0	0	0	0	0	0	0.615715	0.744968	0	0	0	0	0	0	0	0	0	0.313912	0.302092
'SH3BP5'	0	0	0	0	1.41027	0	0	0	0	0	0.370681	0	0	0	0	0	1.12169	0	0.447797	0	0.301591
'PLEKHA5'	0	0	0	0	0	0	0	0	0	0.284513	0	0	0.296009	0	0	0	0	0	0.329402	0	0.298333
'CDH2'	0	0	0	0	0	0	0	0	0	0	0	0	0	0	0	0	0	0	0	0	0.298331
'ADAMTSL3'	0	0	0	0	0	0	0	0	0	0.450583	0.363362	0.309447	0	0	0	0	0	0	0	0	0.292606
'CEP83'	0	0	0.250117	0	0	0	0	0	0	0	0	0	0	0	0	0	0	0	0	0	0.291947
'ABCA6'	0	0.305168	0	0	0	0	0	0	0.337584	1.48107	0	0	1.26532	0	0	0	0	0	0	0	0.291631
'HS3ST3A1'	0	0	0	0	0	0	0	0	0	0	0	0	0	0	0	0	0	0	0	0	0.291291
'LANCL1'	0	0	0	0	0	0	0	0	0	0.317707	0	0	0.260725	0	0	0	0	0.317347	0	0.382076	0.279848
'PCDH7'	0	0	0	0	0	0	0	0	0.299601	0.679544	0.298371	0	0.258535	0	0	0	0	0	0	0	0.279187
'NKAP'	0	0	0	0	0	0	0	0	0	0	0	0	0	0	0	0	0	0	0	0.269241	0.27911
'SLC5A3'	0	0	0	0	0	0	0	0	0	0	0	0	0	0	0.479667	0	0.308873	0	0	0	0.273529
'LOC100736720'	0	0	0	0	0	0	0	0	0	0	0	0	0	0	0	0	0	0	0	0	0.270068
'KCNIP1'	0	0	0	0	0	0	0	0	0	0	0.290227	0	0	0	0	0	0	0	0	0	0.268065
'PSAP'	0	0.353756	0	0.734291	0.370633	0	0	1.11332	0	0	0	0	0	0	0.787081	0	0.935142	0	0.328556	0	0.267911
'SHTN1'	0	0	0	0	0	0	0	0	0	0	0	0	0	0	0.35752	0	0.434809	0.273501	0	0	0.267447
'PREX2'	0	0	0	0.491271	0.279936	0	0	0.84346	0.257517	0	0.782119	0	0	0	0	0	0	0	0	0	0.266824
'LOC100520512'	0	0	0	0	0	0	0	0	0.617233	1.30989	0	0	0.293648	0	0	0	0	0	0	0	0.266362
'PPIG'	0	0	0	0	0	0	0	0	0	0	0	0	0.253634	0	0	0	0	0	0	0	0.266041
'CDK14'	0	0.295203	0	0	0	0	0	0	0.43013	0	0.395026	0	0.289713	0	0	0	0	0	0	0	0.265734
'DHCR24'	0	0.360608	0	0	0	0	0	0	0.252146	0.293591	0	0	0	0	0	0	0.47606	0.25845	0	0	0.265379
'IGSF1'	0	0	0	0	0	0	0	0	0	0	0.348555	0	0	0	0	0	0	0	0	0	0.264551
'HSDL2'	0	0	0	0	0	0	0	0	0	0	0	0	0	0	0	0	0	0	0	0	0.263979
'CWF19L2'	0	0	0	0.538752	0.332444	0	0	0.632189	0	0	0	0.344124	0	0	0	0	0	0	0	0	0.263337
'SLU7'	0	0	0	0	0	0	0	0	0	0	0	0	0	0	0	0.557666	0	0	0	0	0.258514
'MFAP1'	0	0	0	0	0	0	0	0	0	0	0	0	0	0	0	0	0	0	0	0	0.25695
'GIGYF2'	0	0	0	0	0	0	0	0	0	0	0	0	0	0	0	0	0	0	0	0	0.250172
'LOC110261483'	0	0	0	0	0	0	0	0	0	0	0	0	0	0	0	0.501407	0	0.320531	0	2.59728	0
'DUT'	0	0	0	0	0	0	0	0	0	0	0	0	0	0	0.329227	0	0	0.369029	0	2.11394	0
'STMN1'	0	0	0	0.371988	0	0	0	0.749315	0	0	0	0.635973	0	0	0	0.75685	0	0	0	2.09579	0
'TOP2A'	0	0	0	0	0	0	0	0	0	0	0	0	0	0	0	0	0	0	0	1.67803	0
'TMSB15A'	0	0	0	0	0	0	0	0	0	0	0	0	0	0	0	0	0	0	0	1.57824	0
'HMMR'	0	0	0	0	0	0	0	0	0	0	0	0	0	0	0	0	0	0	0	1.55052	0
'SPC24'	0	0	0	0	0	0	0	0	0	0	0	0.503395	0	0.447744	0	0	0	0	0	1.42296	0
'PRC1'	0	0	0	0	0	0	0	0	0	0	0	0	0	0	0	0	0	0	0	1.37481	0
'SMC4'	0	0	0	0	0	0	0	0.388799	0	0	0	0	0	0	0	0.592906	0	0	0	1.37255	0
'TPX2'	0	0	0	0	0	0	0	0	0	0	0	0	0	0	0	0	0	0	0	1.3249	0
'RRM2'	0	0	0	0	0	0	0	0	0	0	0	0	0	0	0.325295	0.461258	0	0	0	1.29495	0
'SMC2'	0	0	0	0	0	0	0	0	0	0	0	0.259648	0	0	0	0	0	0	0	1.26067	0
'KIF23'	0	0	0	0	0	0	0	0	0	0	0	0	0	0	0	0	0	0	0	1.2263	0
'CENPE'	0	0	0	0	0	0	0	0	0	0	0	0	0	0	0	0	0	0	0	1.20625	0
'CENPF'	0	0	0	0	0	0	0	0	0	0	0	0	0	0	0	0	0	0	0	1.12998	0
'H2AFZ'	0	0	0	0.848703	0	0	0	0.737672	0	0	0	0	0	0	0.305482	0.487422	0	0	0	1.12805	0
'NUF2'	0	0	0	0	0	0	0	0	0	0	0	0	0	0	0	0	0	0	0	1.03671	0
'ANLN'	0	0	0	0	0	0	0	0	0	0	0	0	0	0	0	0	0	0	0	1.02349	0
'MFAP5'	0	2.21013	0	0	0	0	0	0	0.53975	0.54034	0	0	0.319256	0	0	0	0	0	0	0.976375	0
'SPAG16'	0	0	0	0	0	0	0	0	0	0	0	0	0	0	0	0	0	0	0	0.966427	0
'KIF11'	0	0	0	0	0	0	0	0	0	0	0	0	0	0	0	0	0	0	0	0.954984	0
'ASPM'	0	0	0	0	0	0	0	0	0	0	0	0	0	0	0	0	0	0	0	0.950822	0
'PTTG1'	0	0	0	0	0	0	0	0	0	0	0	0	0	0	0	0	0	0	0	0.936178	0
'NCAPG2'	0	0	0	0	0	0	0	0	0	0	0	0	0	0	0	0	0	0	0	0.906116	0
'MCM4'	0	0	0	0	0	0	0	0	0	0	0	0	0	0	0	0	0	0	0	0.880183	0
'DLGAP5'	0	0	0	0	0	0	0	0	0	0	0	0	0	0	0	0	0	0	0	0.87207	0
'HMGN5'	0	0	0	0	0	0	0	0	0	0	0	0	0	0.303044	0	0	0	0	0	0.852118	0
'MCM2'	0	0	0	0	0	0	0	0	0	0	0	0	0	0	0	0	0	0	0	0.829753	0
'DIAPH3'	0	0	0	0	0	0	0	0	0	0	0.363315	0	0	0	0	0	0	0	0	0.812312	0
'CCNB2'	0	0	0	0	0	0	0	0	0	0	0	0	0	0	0	0	0	0	0	0.810477	0
'RACGAP1'	0	0	0	0	0	0	0	0	0	0	0	0	0	0	0	0	0	0	0	0.809048	0
'SPC25'	0	0	0	0	0	0	0	0	0	0	0	0	0	0	0	0	0	0	0	0.785232	0
'TCF19'	0	0	0	0	0	0	0	0	0	0	0	0	0	0	0	0	0	0	0	0.759981	0
'CKAP2'	0	0	0	0	0	0	0	0	0	0	0	0	0	0	0	0	0	0	0	0.757266	0
'CLSPN'	0	0	0	0	0	0	0	0	0	0	0	0	0	0	0	0	0	0	0	0.746644	0
'CCP110'	0	0	0	0	0	0	0	0	0	0	0	0	0	0	0	0	0	0	0	0.703854	0
'CAPG'	0	0.892192	0	0	0	0	0	0	0.720032	0.283505	0	0	0.43309	0	0.482088	0.8023	0.459854	0	0	0.695232	0
'LGALS3'	0	1.10931	0	0	0	0	0	0.477286	1.10705	1.07594	0	0	0.690882	0	0	0	0.324802	0	0	0.691004	0
'DNMT1'	0	0	0	0	0	0	0	0	0	0	0	0	0	0	0	0	0.513596	0	0	0.67902	0
'PLK4'	0	0	0	0	0	0	0	0	0	0	0	0	0	0	0	0	0	0	0	0.675265	0
'CCDC34'	0	0	0	0	0	0	0	0	0	0	0	0	0	0	0	0	0	0	0	0.674594	0
'KIF20B'	0	0	0	0	0	0	0	0	0	0	0	0	0	0	0	0	0	0	0	0.65982	0
'TMED3'	0	0.853856	0	0	0	0	0	0	0.558555	0	0	0	0.356875	0	0	0	0	0	0	0.648886	0
'ATAD2'	0	0	0	0	0	0	0	0	0	0	0	0	0	0	0.584871	0	0	0	0	0.640195	0
'PRDX4'	0	1.05612	0	0	0	0	0	0	0.53418	0	0	0	0	0	0	0	0	0	0	0.639625	0
'VCAN'	0	1.22302	0	0	0	0	0	0	0.509651	0.906965	0	0	1.06184	0	0	0	0	0	0	0.61444	0
'KIF15'	0	0	0	0	0	0	0	0	0	0	0	0	0	0	0	0	0	0	0	0.610961	0
'ACTG1'	0	0	0	1.03424	0.265647	0	0	0.828216	0	0	0	0	0	0.733462	0	0	0	0	0	0.606568	0
'CCDC18'	0	0	0	0	0	0	0	0	0	0	0	0	0	0	0	0	0	0.259776	0	0.599437	0
'SGO2'	0	0	0	0	0	0	0	0	0	0	0	0	0	0	0	0	0	0	0	0.585003	0
'KIF4A'	0	0	0	0	0	0	0	0	0	0	0	0	0	0	0	0	0	0	0	0.581978	0
'FKBP9'	0	1.03345	0	0	0	0	0	0	0.532057	0	0	0	0	0	0	0	0	0	0	0.578485	0
'NDC80'	0	0	0	0	0	0	0	0	0	0	0	0	0	0	0	0	0	0	0	0.577285	0
'LYAR'	0	0	0	0	0	0	0	0	0	0	0	0	0	0	0	0	0	0	0	0.548782	0
'OLFML3'	0	1.44021	0	0	0	0	0	0	0.559764	0.521342	0	0	0.510576	0	0	0	0	0	0	0.537373	0
'SPDL1'	0	0	0	0	0	0	0	0	0	0	0	0	0	0	0	0	0	0	0	0.523241	0
'COL6A2'	0	1.10275	0	0	0	0	0	0	1.14177	1.21745	0	0	0.84098	0	0	0	0	0	0	0.515261	0
'ARHGAP11A'	0	0	0	0	0	0	0	0	0	0	0	0	0	0	0	0	0	0	0	0.514097	0
'MEDAG'	0	1.27641	0	0	0	0	0	0	0.71404	0.751126	0	0	0	0	0	0	0	0	0	0.513152	0
'SDK1'	0	0.54732	0	0	0	0	0	0	0.378393	0	0	0	0.296663	0	0	0	0	0	0	0.507878	0
'HTRA1'	0	1.43654	0	0	0	0	0	0	1.16944	0.926095	0	0	1.134	0	0	0	0	0	0	0.506073	0
'SYCP2'	0	0	0	0	0	0	0	0	0	0	0	0	0	0	0	0	0	0	0	0.50601	0
'KIAA1524'	0	0	0	0	0	0	0	0	0	0	0	0	0	0	0	0	0	0	0	0.504819	0
'STMN2'	0	0	0	0	0	0	0	0	0.827512	1.17824	0	0	0	0	0	0	0	0	0	0.488885	0
'LUM'	0	1.7796	0	0	0	0	0	0	1.33472	1.33006	0	0	1.12463	0	0	0	0	0	0	0.480554	0
'PARP2'	0	0	0	0	0	0	0	0	0	0	0	0	0	0	0	0	0	0	0	0.475519	0
'CTGF'	0	0	0.671488	0	0	0	0	0	0.404751	0	0	0	0.806785	0	0	0	0	0	0	0.469618	0
'TM2D2'	0	0	0	0	0	0	0	0	0	0	0	0	0	0	0	0	0	0	0	0.462533	0
'NUCB2'	0	1.02132	0	0	0	0	0	0	0.505741	0.258198	0	0	0.31298	0	0	0	0	0	0	0.455259	0
'BICC1'	0	0.324822	0	0	0	0	0	0	0.560542	0.528213	0	0	0.529889	0	0	0	0	0	0	0.444972	0
'SMC1A'	0	0	0	0	0	0	0	0	0	0	0	0	0	0	0	0	0	0	0	0.441942	0
'MYBL1'	0	0	0	0	0	0	0	0	0	0	0	0	0	0	0	0	0	0	0	0.436365	0
'PTN'	0	1.24837	0	0	0	0	0	0	0.769959	0.412816	0	0	1.022	0	0	0	0	0	0	0.413252	0
'CNTLN'	0	0	0	0	0	0	0	0	0	0	0.419018	0	0	0	0	0	0	0	0	0.407987	0
'IFI6'	0	0	0	0.906861	0	0	0	0.787568	0.25201	0.437679	0	0	0	0	0	0	0	0	0	0.407709	0
'RARRES1'	0	0.747232	0	0	0	0	0	0	1.00894	1.29655	0	0	0.983804	0	0	0	0	0	0	0.405712	0
'S1PR2'	0	0	0	0	0	0	0	0	0	0.318207	0	0	0	0	0.620727	0.281222	0.301098	0	0	0.396592	0
'ELN'	0	1.64618	0	0	0	0	0	0	0.814338	0	0	0	0.455541	0	0	0	0	0	0	0.38961	0
'FAM168B'	0	0	0	0	0	0	0	0	0	0	0	0	0	0	0.336587	0	0	0	0	0.388119	0
'LMAN1'	0	0.585443	0	0	0	0	0	0	0.285132	0	0	0	0	0	0	0	0	0	0	0.384172	0
'LOC100623720'	0	1.09318	0	0	0	0	0	0	1.09924	1.22966	0	0	0.659872	0	0	0	0	0	0	0.372054	0
'HSPA8'	0	0	0	0.786885	0.513065	0	0	1.07601	0	0	0	0.486783	0	0	0.759318	0.539572	1.0483	0	0.425655	0.369243	0
'COL5A2'	0	1.33309	0	0	0	0	0	0	0.918134	0.387664	0	0	0.558426	0	0	0	0	0	0	0.356862	0
'UGDH'	0	0.781219	0	0	0	0	0	0	0.410126	0.270986	0	0	0	0	0	0	0	0	0	0.348545	0
'CHAF1A'	0	0	0	0	0	0	0	0	0	0	0	0	0	0	0	0	0	0	0	0.341218	0
'LRRCC1'	0	0	0	0	0	0	0	0	0	0	0	0	0	0	0	0	0	0	0	0.334376	0
'FOLR2'	0	0.97226	0	0	0	0	0	0	0.708059	0.47379	0	0	0.402781	0	0	0	0.502484	0	0	0.332304	0
'FNBP1'	0	0	0	0	0	0	0	0	0	0	0	0	0	0	0.618895	0	0.307739	0	0	0.323244	0
'LXN'	0	0	0	0.829469	0.623552	0	0	0	0	0	0	0	0	0	0	0	0	0	0	0.322056	0
'PPIL4'	0	0	0	0	0	0	0	0	0	0	0	0	0	0	0	0	0	0	0	0.319094	0
'COL6A3'	0	1.6622	0	0	0	0	0	0	1.23187	1.09617	0	0	1.15744	0	0	0	0	0	0	0.316694	0
'TNXB'	0	1.31634	0	0	0	0	0	0	1.02957	0.400799	0	0.360852	0	0	0	0	0	0	0	0.304477	0
'C1QTNF1'	0	1.24009	0	0	0	0	0.267067	0	0.452567	0.302478	0	0	0	0	0	0	0	0	0	0.302283	0
'CEP135'	0	0	0	0	0	0	0	0	0	0	0	0	0	0	0	0	0	0	0	0.299794	0
'RFC1'	0	0	0	0	0	0	0	0	0	0.260624	0	0	0	0	0	0	0	0	0	0.288833	0
'TPM3'	0	0	0	0.992731	1.09331	0	0	0.757603	0	0	0	0.327355	0	0	0.373055	1.08533	0.601085	0	0.926693	0.288176	0
'CRYBG1'	0	0	0	0	0	0	0	0.318582	0	0	0.280047	0	0	0	1.55363	0	0	0.314854	0	0.288098	0
'ATAD5'	0	0	0	0	0	0	0	0	0	0	0	0	0	0	0	0	0	0	0	0.285699	0
'ABL2'	0	0	0	0	0	0	0	0	0	0	0	0	0	0	0	0	0	0	0	0.285327	0
'LCORL'	0	0	0	0	0	0	0	0	0	0	0.338811	0	0	0	0.308736	0	0	0	0	0.284708	0
'CENPJ'	0	0	0	0	0	0	0	0	0	0	0	0	0	0	0	0	0	0	0	0.280825	0
'KANSL1L'	0	0	0	0	0	0	0	0	0	0	0.369617	0	0	0	0	0	0	0	0	0.276013	0
'DDAH1'	0	0	0	0	0	0	0	0	0.485766	0	0	0.36775	0.52754	0	0	0	0	0	0	0.275127	0
'GTF2IRD1'	0	0	0	0	0	0	0	0	0	0	0.285487	0	0	0	0	0	0	0	0	0.27238	0
'XG'	0	0.823262	0	0	0	0	0	0	0.867551	1.23711	0	0	0.398001	0	0	0	0	0	0	0.271867	0
'BAZ1B'	0	0	0	0	0	0	0	0	0	0	0	0	0	0	0	0	0	0	0	0.270409	0
'PTGES'	0	0	0	0	0	0	0	0	0.805276	0.794214	0	0	0.620077	0	0	0	0	0	0	0.268652	0
'TRAIP'	0	0	0	0	0	0	0	0	0	0	0	0	0	0	0	0	0	0	0	0.268325	0
'C7H6orf89'	0	0	0	0	0	0	0	0	0	0.282765	0	0	0.294956	0	0	0	0	0	0	0.267674	0
'TCHP'	0	0	0	0	0	0	0	0	0	0	0	0.262806	0	0	0	0.272334	0	0	0	0.266386	0
'KDELR3'	0	0.895796	0	0	0	0	0	0	0.583908	0	0	0	0.255769	0	0	0	0	0	0	0.265604	0
'UNC80'	0	0	0	0	0	0	0	0	0	0	0	0	0	0	0	0	0	0	0	0.264776	0
'SSBP1'	0	0	0	0	0	0	0	0	0	0	0	0	0	0.268472	0.437352	0	0	0	0	0.261328	0
'WDR12'	0	0	0	0	0	0	0	0	0	0	0	0	0	0	0	0	0	0	0	0.261157	0
'RBBP6'	0	0	0	0.310955	0	0.330343	0	0	0	0	0	0	0	0	0	0.403883	0	0	0	0.260812	0
'GPSM2'	0	0	0	0	0	0	0	0	0.281886	0.314178	0	0.337954	0	0	0	0	0	0	0	0.25908	0
'MYH10'	0	0.690697	0	0	0	0	0	0	0.657595	0.694819	0	0.384928	0.66596	0	0	0	0	0	0	0.258733	0
'SLC41A2'	0	0.594697	0	0	0	0	0	0	0.394242	0	0	0	0.288931	0	0	0	0	0	0	0.256832	0
'COL1A1'	0	2.96898	0	0	0	0	0	0	1.16505	0	0	0	0.360508	0	0	0	0	0	0	0.256356	0
'RCN1'	0	1.78634	0	0	0	0	0	0	0.712403	0	0	0	0	0	0	0	0	0	0	0.253159	0
'PCOLCE2'	0	1.27001	0	0	0	0	0	0	0.591067	0.550031	0	0	0.461034	0	0	0	0	0	0	0.251953	0
'LOC100158001'	0	0	0	0	0	0	0	0	0	0	0	0	0	0	0	0	0	3.41253	0	0	0
'KRT5'	0	0	0	0	0	0	0	0	0	0	0	0	0	0	0	0	0	2.59899	0	0	0
'LOC110255312'	0	0	0	0	0	0	0	0	0	0	0	0	0	0	0	0	0	2.34658	0	0	0
'CRISP3'	0	0	0	0	0	0	0	0	0	0	0	0	0	0	0	0	0	1.96598	0	0	0
'S100A2'	0	0	0	0	0	0	0	0	0	0	0	0	0	0	0	0	0	1.94653	0	0	0
'MT1A'	0	0	0	0	0	0	0	0	0	0	0	0	0	0	0	0	0	1.92236	0	0	0
'SRD5A1'	0	0	0	0	0	0	0	0.53795	0	0	0	0	0	0	0	0	0	1.78934	0	0	0
'PERP'	0	0	0	0	0	0	0	0	0	0	0	0	0	0	0	0	0	1.64649	0	0	0
'SPINT2'	0	0	0	0.29051	0.542558	0	0	0.476835	0	0	0	0	0	0	0.639676	0	0	1.63219	0	0	0
'NXPE2'	0	0	0	0	0	0	0	0	0	0	0	0	0	0	0	0	0	1.55095	0	0	0
'ECHDC1'	0	0	0	0	0	0	0	0	0	0	0	0	0	0	0	0	0	1.49577	0	0	0
'COL17A1'	0	0	0	0	0	0	0	0	0	0	0	0	0	0	0	0	0	1.43196	0	0	0
'TACSTD2'	0	0	0	0	0	0	0	0	0	0	0	0	0	0	0	0	0	1.41382	0	0	0
'F3'	0	0	0	0	0	0.275888	0	0	0	0	0	0	0.29657	0.308253	0	0	0	1.38602	0	0	0
'DSP'	0	0	0	0	0	0	0	0	0	0	0	0	0	0	0	0	0	1.23926	0	0	0
'EHF'	0	0	0	0	0	0	0	0	0	0	0	0	0	0	0.788302	0	0	1.21714	0	0	0
'GNPTAB'	0	0	0	0.330034	0.389169	0	0	0.317712	0	0	0.430053	0	0	0	0.278254	0	0	1.20505	0	0	0
'CLDN4'	0	0	0	0	0	0	0	0	0	0	0	0	0	0	0	0	0	1.17093	0	0	0
'EPCAM'	0	0	0	0	0	0	0	0	0	0	0	0	0	0	0.795198	0	0	1.12548	0	0	0
'KYNU'	0	0	0	0	0	0	0	0	0	0	0	0	0	0	0.42082	0	0	1.05476	0.522408	0	0
'RBM47'	0	0	0	0	0	0	0	0	0	0	0	0	0	0	0.440116	0	0.972564	1.03769	0	0	0
'TMEM254'	0	0	0	0	0	0	0	0	0	0	0	0	0	0	0	0	0	1.01828	0	0	0
'PAH'	0	0	0	0	0	0	0	0	0	0	0	0	0	0	0	0	0	0.999754	0	0	0
'ELOVL6'	0	0	0	0	0	0.445357	0	0	0	0	0	0	0	0	0	0.284295	0	0.949705	0	0	0
'FAM25A'	0	0	0	0	0	0	0	0	0	0	0	0	0	0	0	0	0	0.938106	0	0	0
'SLCO2B1'	0	0	0	0	0	0	0	0	0	0	0	0	0	0	0	0	0	0.933531	0	0	0
'SERPINB5'	0	0	0	0	0	0	0	0	0	0	0	0	0	0	0	0	0	0.867791	0	0	0
'LGALS7'	0	0	0	0	0	0	0	0	0	0	0	0	0	0	0	0	0	0.851862	0	0	0
'PATJ'	0	0	0	0	0	0	0	0	0	0	0	0	0	0	0	0	0	0.807768	0	0	0
'TSPAN33'	0	0	0	0	0	0	0	0	0	0	0	0	0	0	1.09511	0	0	0.805015	0	0	0
'ABCC11'	0	0	0	0	0	0	0	0	0	0	0	0	0	0	0	0	0	0.796146	0	0	0
'PLIN2'	0	0	0	0	0	0.417762	0	0	0	0	0	0	0	0	0	0	1.07711	0.77664	0	0	0
'TBC1D4'	0	0	0	0	0	0	0	0	0	0	0	0.393337	0	0	0	0.566626	0	0.772305	0	0	0
'LOC102165485'	0	0	0	0	0	0	0	0	0	0	0	0	0	0	0.488786	1.62441	0.717402	0.771613	0.900284	0	0
'AUTS2'	0	0	0	0	0	0	0	0	0	0	1.14904	0.332805	0	0	0	0	0	0.739509	0	0	0
'LRRC43'	0	0.454744	0	0	0	0	0	0	0	0	0.474295	0	0	0	0	0	0	0.72163	0	0	0
'NEBL'	0	0	0	0.263488	0	0	0	0.775899	0	0	0.461849	0	0	0	0.276236	0	0	0.721061	0.575109	0	0
'EMB'	0	0	0	0	0	0	0	0	0	0	0	0	0	0	0	0.374649	0	0.717387	0	0	0
'UGT1A6'	0	0	0	0	0	0	0	0	0	0.31105	0	0	0	0	0	0	0	0.706931	0	0	0
'ESRP1'	0	0	0	0	0	0	0	0	0	0	0	0	0	0	0	0	0	0.672586	0	0	0
'SBSN'	0	0	0	0	0	0	0	0	0	0	0	0	0	0	0	0	0	0.67037	0	0	0
'GATA3'	0	0	0	0	0	0	0	0.78784	0	0	0	0	0	0	0	1.32503	0	0.669601	0	0	0
'PLXNC1'	0	0.351948	0	0	0	0	0	0	0.327394	0	0.479408	0	0.458492	0	0.87053	0	0.533138	0.648595	0	0	0
'TBC1D2'	0	0	0	0	0	0	0	0.557127	0	0	0	0	0	0	0	0	0.96547	0.640684	0.274314	0	0
'HIPK2'	0	0	0	0	0	0	0	0	0	0	0.446489	0	0	0	0	0	0	0.635597	0	0	0
'IL1R2'	0	0	0	0	0	0	0	0	0	0	0	0	0	0	3.07653	0	0.403505	0.631623	0	0	0
'VAV3'	0	0	0	0	0	0	0	0	0	0	0.277601	0.950342	0	0	1.17342	0.404734	1.17944	0.629744	0.718075	0	0
'NEDD4L'	0	0	0	0	0	0	0	0	0	0	0.582704	0	0	0	0.596509	0	0	0.623538	0	0	0
'GPT2'	0	0	0	0	0	0	0	0	0	0	0	0	0	0	0	0	0	0.613418	0	0	0
'DAPK2'	0	0	0	0	0	0	0	0	0	0	0	0	0	0	0	0	0	0.613005	0	0	0
'PRRG4'	0	0	0	0	0	0	0	0	0	0	0	0	0	0	1.03112	0.251094	0.486005	0.588125	0	0	0
'SHROOM3'	0	0	0	0	0	0	0	0	0	0	0.301078	0	0	0	0	0	0	0.587308	0	0	0
'PIK3C2G'	0	0	0	0	0	0	0	0	0	0	0.379948	0	0	0	0	0	0	0.567407	0	0	0
'MAPK10'	0	0	0	0	0	0	0	0	0	0	0	0	0	0	0	0	0	0.546184	0	0	0
'MSI2'	0	0	0	0	0	0	0	0	0	0	0.66964	0	0	0	0	0	0	0.533082	0	0	0
'DSC3'	0	0	0	0	0	0	0	0	0	0	0	0	0	0	0	0	0	0.524163	0	0	0
'HACL1'	0	0	0	0	0	0	0	0	0	0	0	0	0	0	0	0	0	0.511245	0	0	0
'RASSF5'	0	0	0	0	0	0	0	0	0	0	0	0	0	0	1.21981	0.856697	0	0.509648	0	0	0
'EDAR'	0	0	0	0	0	0	0	0	0	0	0	0	0	0	0	0	0	0.507282	0	0	0
'SLC26A4'	0	0	0	0	0	0	0	0	0	0	0	0	0	0	0	0	0	0.50003	0	0	0
'CTSL'	0	0	0	0	0	0	0	0	0	0	0	0	0	0	0	0	0	0.499191	0	0	0
'AHNAK2'	0	0.278478	0	0	0	0	0	0	0.339996	0.4371	0	0	0.499341	0	0	0	0	0.496258	0	0	0
'TGFA'	0	0	0	0	0	0	0	0	0	0	0	0	0	0	0	0	0	0.493884	0	0	0
'ZNF704'	0	0	0	0	0	0	0	0	0.256722	0	0.281089	0	0.389083	0	0	0	0	0.493669	0	0	0
'ACER3'	0	0	0	0	0	0	0	0	0	0	0.319106	0	0	0	0.324963	0	0.39327	0.463496	0.460168	0	0
'TRPS1'	0	0	0	0	0	0	0	0	0.374086	0.37666	0.304433	0	1.07728	0	0	0	0.631339	0.462111	0	0	0
'GOLGA4'	0	0.509424	0	0	0	0	0	0	0.327536	0.302283	0	0	0	0	0	0	0	0.458488	0	0	0
'PCP4'	0	0	0	0	0	0	0	0	0	0	0	0	0	0	0	0	0	0.455353	0	0	0
'CREB3'	0	0	0	0	0	0	0	0	0	0	0	0	0	0	0	0	0	0.444741	0	0	0
'N4BP2'	0	0	0	0	0	0	0	0	0	0	0	0	0	0	0	0	0	0.440237	0	0	0
'ALDH1A1'	0	0.324234	0	0	0	0	0	0	0	0	0	0	0	0	0	0	0	0.437599	0	0	0
'NR3C2'	0	0	0	0	0	0	0	0	0	0	0.565329	0.299793	0	0	0	0	0	0.421956	0	0	0
'KIAA1211L'	0	0	0	0	0	0	0	0	0	0	0	0	0	0	0.599465	0	0.789656	0.410509	0	0	0
'ARHGEF28'	0	0	0	0.272855	0	0	0	0	0	0	0.468466	0	0	0	0	0	0	0.406003	0	0	0
'EFNA5'	0	0.265425	0	0	0	0	0	0	0	0.353568	0	0	0	0	0	0	0	0.389881	0	0	0
'ANKRD22'	0	0	0	0	0	0	0	0	0	0	0	0	0	0	0	0	0	0.38657	0.526127	0	0
'ADHFE1'	0	0	0	0	0	0	0	0	0	0	0	0	0	0	0	0	0	0.384786	0	0	0
'SPINK5'	0	0	0	0	0	0	0	0	0	0	0	0	0	0	0	0	0	0.381171	0	0	0
'ELOVL7'	0	0	0	0.385714	0.763236	0	0	0	0	0	0.389956	0.296455	0	0	0	0	0	0.376739	0	0	0
'ITSN2'	0	0	0	0.303224	0	0	0	0.335998	0	0	0.354931	0.25478	0	0	0.354949	0.657411	0	0.376347	0.419694	0	0
'CFI'	0	0	0	0	0	0	0	0	0	0	0	0	0	0	0	0	0	0.37619	0	0	0
'COL7A1'	0	0	0	0	0	0	0	0	0.388766	0	0	0	0.748694	0	0	0	0	0.376009	0	0	0
'XRRA1'	0	0	0	0	0	0	0	0	0	0	0	0	0	0	0	0	0	0.375803	0	0	0
'LAMA3'	0	0.399207	0	0.385279	0.411834	0	0	0.404133	0	0	0.82644	0	0	0	0	0	0	0.373287	0	0	0
'GALNT7'	0	0	0	0	0	0	0	0	0	0	0	0	0	0	0	1.12204	0	0.370053	0	0	0
'RAD51B'	0	0	0	0	0	0	0	0	0	0	0.52991	0	0	0	0	0	0	0.368489	0	0	0
'C16H5orf34'	0	0	0	0	0	0	0	0	0	0	0	0	0	0	0	0	0	0.354303	0	0	0
'ARL4A'	0	0	0	0	0.573747	0	0	0.377893	0	0	0	1.05096	0	0.263396	0	0	0	0.350534	0	0	0
'MOXD1'	0	0	0	0	0	0	0	0	1.02734	0	0	0	0	0.329597	0	0	0	0.349167	0	0	0
'TMEM135'	0	0	0	0	0	0	0	0	0	0	0.377183	0	0	0	0	0	0.387267	0.346537	0	0	0
'MFSD4A'	0	0	0	0.476243	0	0	0	0.558581	0	0	0	0	0	0	0	0	0	0.344444	0	0	0
'GANC'	0	0	0	0	0	0	0	0	0	0	0	0	0	0	0	0	0	0.343948	0	0	0
'PSEN2'	0	0	0	0	0	0	0	0	0	0	0	0	0	0	0.667007	0	0.603108	0.340645	0	0	0
'KCTD8'	0	0	0	0	0	0	0	0	0	0	0	0	0	0	0	0	0	0.336404	0	0	0
'SIPA1L1'	0	0	0	0	0	0	0	0.262946	0	0	0.315282	0	0	0	0.303024	0	0	0.329144	0	0	0
'IMMP2L'	0	0	0	0	0	0	0	0	0	0	0.711962	0	0	0	0	0	0.256006	0.327286	0	0	0
'GALK2'	0	0	0	0	0	0	0	0	0	0	0	0	0	0	0	0	0.284985	0.326098	0	0	0
'AKAP9'	0	0.266499	0	0	0	0	0	0	0	0	0.27266	0	0	0	0	0	0	0.326097	0	0	0
'RAD50'	0	0	0	0	0	0	0	0	0	0.250866	0	0	0	0	0	0	0	0.322296	0	0	0
'AFF3'	0	0.43482	0	0	0	0	0	0	0	0	0.361358	0	0	0	0.40883	0	0	0.319785	0	0	0
'LOC100514323'	0	0	0	0	0	0	0	0	0	0	0	0.544754	0	0	0	0	0	0.319397	0	0	0
'LOC100625479'	0	0	0	0	0	0	0.358418	0	0	0	0	0	1.36213	0	0	0	0	0.31797	0	0	0
'LGR4'	0	0	0.471329	0	0	0	0	0	0	0	0	0	0	0	0	0	0	0.306658	0	0	0
'LRCH3'	0	0	0	0	0	0	0	0	0	0	0	0	0	0	0	0	0	0.301697	0	0	0
'SPATA13'	0	0	0	0	0.271371	0	0	0	0	0	0.750907	0	0	0	0	0	0	0.300478	0	0	0
'KCNB1'	0	0	0	0	0	0	0	0	0	0	0	0	0	0	0	0	0	0.295665	0	0	0
'BHLHE41'	0	0	0	0	0	0	0	0	0	0	0	0	0.555178	0	1.04349	0	0.667791	0.293116	0.669983	0	0
'ESR1'	0	0	0	0	0	0	0	0	0	0	0	0	0	0	0	0	0	0.290418	0	0	0
'AQP11'	0	0	0	0	0	0	0	0	0	0	0	0	0	0	0	0	0	0.289788	0	0	0
'LARP1B'	0	0	0	0	0	0	0	0	0	0	0	0	0	0	0	0	0	0.287377	0	0	0
'TES'	0	0	0	0.467177	0	0	0	0.265055	0	0	0	0	0	0	0	0	0	0.287181	0	0	0
'EYS'	0	0	0	0	0	0	0	0	0	0	0.797949	0	0	0	0	0	0	0.284206	0	0	0
'TTC25'	0	0	0	0	0	0	0	0	0	0	0	0	0	0	0	0	0	0.28201	0	0	0
'PCCA'	0	0	0	0	0	0	0	0	0	0	0.402233	0.296078	0	0	0	0	0	0.281816	0	0	0
'LRP1B'	0	0	0	0	0	0	0	0	0	0	0.894872	0	0	0	0	0	0	0.277072	0	0	0
'FCGR2B'	0	0	0	0	0	0	0	0	0	0	0	0	0	0	1.69866	0	0.900513	0.275936	0	0	0
'PLBD1'	0	0	0	0	0	0	0	0	0	0	0	0	0	0	0.530893	0	0.678753	0.273923	0	0	0
'COL8A2'	0	0	0	0	0	0	0	0	0	0	0	0	0.701258	0	0	0	0	0.265397	0	0	0
'ACSM3'	0	0	0	0	0	0	0	0	0	0	0	0	0	0	0	0	0	0.264545	0	0	0
'NHSL1'	0	0	0	0	0	0	0	0	0	0	0	0.586772	0	0	0	0	0	0.263067	0	0	0
'RBP1'	0	0	0	0	0	0	0	0	0.34341	0.316027	0	0	0	0	0	0	0	0.263017	0	0	0
'SLC39A11'	0	0	0	0	0	0	0	0	0	0	0.40126	0	0	0	0	0	0.706692	0.258754	0	0	0
'SEMA3A'	0	0	0	0	0	0	0	0	0.731039	0	0.383751	0	0	0	0	0	0	0.256506	0	0	0
'RAB27B'	0	0	0	0	0	0	0	0	0	0	0	0	0	0	0	1.84365	0	0.254683	0	0	0
'COL23A1'	0	0	0	0	0	0	0	0.337738	0.681484	0	0	0	0.475135	0	0	0	0	0.254225	0	0	0
'GOLGB1'	0	0	0	0	0	0	0	0	0	0.321858	0	0.309949	0	0	0	0	0	0.252492	0	0	0
'UTP20'	0	0	0	0	0	0	0	0	0	0	0	0	0	0	0	0	0	0.251103	0	0	0
'FOXP2'	0	0	0	0	0	0	0	0	0	0	0.345597	0.320646	0	0	0	0	0	0.250722	0	0	0
'GIMAP1'	0	0	0	0	0	0	0	0	0	0	0	0	0	0	3.0944	2.82683	2.06342	0	2.98786	0	0
'BCL2A1'	0	0	0	0	0	0	0	0	0	0	0	0	0	0	2.79272	0.402712	1.12399	0	2.92993	0	0
'MAFB'	0	0	0	0	0	0	0	0	0	0	0	0	0.970948	0	0.81292	0	1.77956	0	2.69572	0	0
'SLA-DQA1'	0	0	0	1.08428	0.454845	0	0	1.17233	0	0	0	0	0	0	3.346	0	1.95777	0	2.30753	0	0
'SGK1'	0	0	0	0.625465	0	0	0	0	0	0	0	0.85437	0	0	0.929538	0.912326	1.31022	0	2.19695	0	0
'SRGN'	0	0	0	0	0	0	0	0.509691	0	0	0	0	0	0	2.6992	2.83793	2.77902	0	2.17932	0	0
'LOC100525396'	0	0	0	0	0	1.03733	0.436794	0	0	0	0	0	0	0	1.22233	0	0.772139	0	2.15122	0	0
'SLA-DQB1'	0	0	0	1.03329	0.531733	0	0	1.14392	0	0	0	0	0	0	3.28934	0	1.82509	0	2.09043	0	0
'FCER1G'	0	0	0	0	0	0	0	0	0	0	0	0	0	0	1.28637	0.464609	1.69699	0	2.08137	0	0
'RGS1'	0	0	0	0	0	0	0	0	0	0	0	0	0	0	2.57191	2.91548	3.23524	0	2.06194	0	0
'SLA-DRB1'	0	0	0	0.619236	0.519885	0	0	0.934967	0	0	0	0	0	0	3.33075	0	1.78668	0	1.90601	0	0
'FCGR3A'	0	0	0	0	0	0	0	0	0	0	0	0	0	0	1.84952	0.770358	2.34862	0	1.8843	0	0
'CD83'	0	0	0	0	0	0	0	0	0	0	0	0	0	0	2.59707	0	1.46266	0	1.86052	0	0
'CD300C'	0	0	0	0	0	0	0	0	0	0	0	0	0	0	0	0	0.261758	0	1.71709	0	0
'PLEK'	0	0	0	0	0	0	0	0	0	0	0	0	0	0	1.44058	0	0.894639	0	1.69851	0	0
'IL10RA'	0	0	0	0	0	0	0	0	0	0	0	0	0	0	0.829085	0.842481	1.17398	0	1.63696	0	0
'CYTIP'	0	0	0	0	0	0	0	0	0	0	0	0	0	0	0.655851	0.998249	0.274064	0	1.62794	0	0
'TNFRSF1B'	0	0	0	0	0.493069	0.313148	0	0	0	0	0	0	0	0	1.44066	1.72876	0.584925	0	1.62665	0	0
'PTPRC'	0	0	0	0	0	0	0	0	0	0	0	0	0	0	0.918395	1.73408	0.680525	0	1.62021	0	0
'SLA-DRA'	0	0	0	0.98211	0.554373	0	0	1.17889	0	0	0	0	0	0	3.28375	0	1.65324	0	1.60188	0	0
'CXCL8'	0	0	0	0	0	0	0	0	0	0	0	0	0	0	2.99054	0	1.93275	0	1.59181	0	0
'CD53'	0	0	0	0	0	0	0	0	0	0	0	0	0	0	1.92189	2.56734	1.37556	0	1.47452	0	0
'LAPTM5'	0	0	0	0	0	0	0	0	0	0	0	1.58126	0	0	1.96347	2.55442	1.5459	0	1.46994	0	0
'TYROBP'	0	0	0	0	0	0	0	0	0	0	0	0	0	0	2.55805	0.342362	1.89335	0	1.44538	0	0
'IRF5'	0	0	0	0	0	0	0	0	0	0	0	0	0	0	1.21754	0.300976	1.13701	0	1.42857	0	0
'TNFSF9'	0	0	0	0	0	0.305618	0	0	0	0	0	0	0	0	0.447563	1.18101	1.2161	0	1.41597	0	0
'ENPP4'	0	0	0	0.336861	0	0	0	0.493898	0	0	0	0	0	0	0	0	0	0	1.40433	0	0
'CD74'	0	0	0	1.22945	0.971547	0	0	1.3179	0	0	0	0	0	0	2.91652	0	1.63144	0	1.39347	0	0
'STK17A'	0	0	0	0	0	0	0.714947	0.317594	0	0	0	0	0	0	0.824919	1.29308	0	0	1.38714	0	0
'BIRC3'	0	0	0	0.781662	0	0	0	1.12027	0	0	0	0	0	0	0.633266	0	0	0	1.38353	0	0
'TBXAS1'	0	0	0	0	0	0	0	0	0	0	0	0	0	0	0	0	0.459579	0	1.38338	0	0
'GMFG'	0	0	0	0	0	0	0	0	0	0	0	0.47893	0	0	0.918018	0.341097	0.812429	0	1.37036	0	0
'C5AR1'	0	0	0	0	0	0	0	0	0	0	0	0	0	0	0	0	1.3928	0	1.3684	0	0
'CCL5'	0	0	0	0	0	0	0	0	0	0	0	0	0	0	1.54332	1.12736	1.07788	0	1.35907	0	0
'AIF1'	0	0	0	0	0	0	0	0	0	0	0	0	0	0	1.24332	0	1.52886	0	1.3539	0	0
'LOC100514068'	0	0	0	0	0	0	0	0	0	0	0	0	0	0	0	0	0.74114	0	1.32839	0	0
'CSF1R'	0	0	0	0	0	0	0	0	0	0	0	0	0	0	0.935689	0	2.4452	0	1.28066	0	0
'LOC100154053'	0	0	0	0	0	0	0	0	0	0	0	0	0	0	1.44728	1.48111	0.683883	0	1.26457	0	0
'NCF2'	0	0	0	0	0	0	0	0	0	0	0	0	0	0	1.16639	0	1.04542	0	1.25523	0	0
'ITGB2'	0	0	0	0	0	0	0	0	0	0	0	0	0	0	0.926752	0.473031	0.862261	0	1.25168	0	0
'ARHGAP30'	0	0	0	0	0	0	0	0	0	0	0	0	0	0	0.674356	1.90165	0.486679	0	1.2327	0	0
'RGS18'	0	0	0	0	0	0	0	0	0	0	0	0	0	0	0.600912	0	0	0	1.21369	0	0
'ADGRG1'	0	0	0	1.27969	1.06281	0	0	1.29252	0	0	0.642224	0	0	0	0	0	0	0	1.16206	0	0
'CD86'	0	0	0	0	0	0	0	0	0	0	0	0	0	0	1.96512	0	0.691355	0	1.1531	0	0
'TNF'	0	0	0	0	0	0	0	0	0	0	0	0	0	0	0.523055	0.543093	0.641969	0	1.12405	0	0
'POU2F2'	0	0	0	0	0	0	0	0	0	0	0	0	0	0	0.336719	0	0	0	1.12178	0	0
'PLVAP'	0	0	0	1.13387	1.44128	0	0	0	0	0	0.37445	0	0	0	0	0	0	0	1.11543	0	0
'RHOH'	0	0	0	0	0	0	0	0	0	0	0	0	0	0	0.269219	2.13586	0.52344	0	1.10217	0	0
'DUSP2'	0	0	0	0	0	0	0	0	0	0	0	0	0	0	0.812803	0.684718	1.61799	0	1.08699	0	0
'PTGS1'	0	0	0	0	0	0	0	0	0.753905	0	0	0	0.269399	0	0	0.800552	0	0	1.08205	0	0
'SLA'	0	0	0	0	0	0	0	0	0	0	0	0	0	0	1.70333	2.55307	0	0	1.07829	0	0
'HSPH1'	0	0	0	0	0	0	0	0	0	0	0	0	0	0	0.375603	0.534799	0.964805	0	1.06463	0	0
'LCP1'	0	0	0	0	0	0	0	0	0	0	0	0	0	0	1.57217	1.87313	1.18727	0	1.04739	0	0
'CD80'	0	0	0	0	0	0	0	0	0	0	0	0	0	0	1.34448	0.40328	0.408556	0	1.04521	0	0
'C1QC'	0	0	0	0	0	0	0	0	0	0	0	0	0	0	0	0	3.12472	0	0.993421	0	0
'FAM46C'	0	0	0	0	0	0	0	0	0	0	0	0	0	0	1.48611	0.730809	1.05437	0	0.979275	0	0
'LOC110256340'	0	0	0	0	0	0	0	0	0	0	0	0	0	0	0.548354	0	0.543247	0	0.977749	0	0
'SAT1'	0	0	0	0.442343	0	0	0	0.729299	0	0	0	0	0	0	0.412434	0.720694	0.346069	0	0.959081	0	0
'RGS2'	0	0	0	0.843828	0.687351	0	0	1.2423	0	0	0	0	0	0	0.44781	1.23056	1.65696	0	0.956969	0	0
'PLEKHF2'	0	0	0	0	0	0	0	0	0	0	0	0	0	0	0	0.480141	0	0	0.951129	0	0
'UBL3'	0	0	0	0	0	0	0	0	0	0	0	0	0	0	1.29365	0.56664	1.14007	0	0.949665	0	0
'MGAT4A'	0	0	0	0	0	0	0	0	0	0	0	0.321407	0	0	0.525477	0	1.09139	0	0.944042	0	0
'BANK1'	0	0	0	0	0	0	0	0	0	0	0.298725	0	0	0	0.306	0	0.984142	0	0.940661	0	0
'SPEN'	0	0	0	0	0	0	0	0	0	0	0	0	0	0	0	0.256506	0	0	0.915874	0	0
'CPM'	0	0	0.309548	0	0	0.856084	0.462249	0	0	0	0	0	0	0	0	0	0.663205	0	0.897271	0	0
'THEMIS2'	0	0	0	0	0	0	0	0	0	0	0	0	0	0	0.844454	0	0.499951	0	0.88089	0	0
'FYB'	0	0	0	0	0	0	0	0	0	0	0	0	0	0	0.337256	0.667905	0.722072	0	0.871239	0	0
'PIK3AP1'	0	0	0	0	0	0	0	0	0	0	0	0	0	0	1.16158	1.47029	0.645669	0	0.870867	0	0
'CFLAR'	0	0	0	0.371811	0.313011	0	0	0.402952	0	0	0	0.701367	0	0	0.853562	0.850112	0	0	0.842629	0	0
'MTSS1'	0	0	0	0	0	0	0	0	0	0	0	0	0	0	0.508671	0.459265	0.683814	0	0.841109	0	0
'CD48'	0	0	0	0	0	0	0	0	0	0	0	0	0	0	0.966048	1.35464	0.63103	0	0.834501	0	0
'PLCB2'	0	0	0	0	0	0	0	0	0	0	0	0	0	0	0.618878	0	0.329511	0	0.819626	0	0
'CCDC88A'	0	0	0	0	0	0	0	0	0	0.356646	0	0	0	0	1.17752	0	0.747006	0	0.804454	0	0
'CLEC2D'	0	0	0	0.678428	0.569611	0	0	0.330871	0	0	0	0	0	0	0.389425	0.793599	0	0	0.804446	0	0
'EHD4'	0	0	0	0.29573	0.438424	0	0	0.28712	0	0	0.480886	0	0	0	0	0	0	0	0.793948	0	0
'TNFAIP8'	0	0	0	0	0	0	0	0	0	0	0	0	0	0	0.470316	0.807009	0.577813	0	0.77226	0	0
'INPP5D'	0	0	0	0	0	0	0	0	0	0	0.3444	0	0	0	0.570607	0.86257	0.78627	0	0.749846	0	0
'PRKCB'	0	0	0	0	0	0	0	0	0	0	0.415934	0	0	0	0	0.91022	0.255834	0	0.748847	0	0
'LRMP'	0	0	0	0	0	0	0	0	0	0	0	0	0	0	0	0.454975	0	0	0.738929	0	0
'CYTH1'	0	0	0	0	0	0	0	0	0	0	0.311965	0	0	0	1.62095	1.31099	0.691063	0	0.735948	0	0
'SAMSN1'	0	0	0	0	0	0	0	0	0	0	0	0	0	0	0.399061	2.15955	0.493048	0	0.733167	0	0
'BACH1'	0	0	0	0	0	0.397574	0.60645	0	0	0	0	0	0	0	0.955579	0	0	0	0.723079	0	0
'CTSS'	0	0	0	0.297504	0.402362	0	0	0.344756	0	0	0	0	0	0	1.70831	0	2.15062	0	0.719055	0	0
'ATP2B1'	0	0	0	0	0	0	0	0	0	0	0	0.635849	0	0	1.39661	0.331246	0.836798	0	0.704391	0	0
'TRAF1'	0	0	0	0.34666	0	0	0	0.2696	0	0	0	0	0	0	0.678456	0.362233	0.368549	0	0.690548	0	0
'DUSP1'	0	0	0	0.725191	0.912219	0	0	1.04209	0	0	0	0.980902	0	0	0	0.322225	1.03663	0	0.687935	0	0
'HCLS1'	0	0	0	0	0	0	0	0	0	0	0	0	0	0	0.655291	0.649574	0.780086	0	0.679989	0	0
'GRK3'	0	0	0	0	0	0.290362	0	0	0	0	0	0	0	0	0.896959	0	0.700487	0	0.6746	0	0
'HPGD'	0	0.475921	0	0	0	0	0	0	0.9061	0.479339	0	0	0	0	0	0	0	0	0.671374	0	0
'APBB1IP'	0	0	0	0	0	0	0	0	0	0	0	0	0	0	0.387929	0.648583	0.65681	0	0.669859	0	0
'EMP1'	0	0	0	0.863245	0	0	0.335931	1.12736	0	0	0	0	0	0	0	0	0	0	0.666014	0	0
'TMIGD3'	0	0	0	0	0	0	0	0	0	0	0	0	0	0	0.513311	0	0.613165	0	0.653763	0	0
'TNIK'	0	0	0	0	0	0	0	0	0	0	0.335945	0	0	0	0	0.580234	0	0	0.65327	0	0
'CCL4'	0	0	0	0	0	0	0	0	0	0	0	0	0	0	0	0	0.430878	0	0.646274	0	0
'ARHGAP25'	0	0	0	0	0.411901	0	0	0	0	0	0	0	0	0	0.422487	1.72079	0.327827	0	0.640669	0	0
'SOD2'	0	0	0	0	0	0.304111	0.418281	0	0	0	0	0	0	0	0	0	0.589022	0	0.637531	0	0
'SNX10'	0	0	0.319373	0	0	0.457439	0	0	0	0	0	0	0	0	0.582872	0	0.6275	0	0.631853	0	0
'KIAA1551'	0	0	0	0.518678	0.413011	0	0	0	0	0	0	0	0	0	0	0.265129	0.329443	0	0.628217	0	0
'HCK'	0	0	0	0	0	0	0	0	0	0	0	0	0	0	0	0	0	0	0.622509	0	0
'DOCK8'	0	0	0	0	0	0	0	0	0	0	0	0	0	0	0.435487	0.41984	0	0	0.605347	0	0
'PNP'	0	0	0	0.340336	0	0	0	0	0	0	0	0	0	0	1.45565	1.71372	0	0	0.599495	0	0
'SLA-1'	0	0	0	0.91922	0.588988	0	0	1.1301	0	0	0	0	0	0	0	0.643776	0	0	0.598981	0	0
'NFKB1'	0	0	0	0	0	0.471769	0	0	0	0	0	0	0	0	1.50147	1.05195	0.434258	0	0.595045	0	0
'THRB'	0	0	0	0	0	0	0	0	0.27715	0.521721	0.32348	0	0	0	0	0	0	0	0.58911	0	0
'TMEM2'	0	0	0	0	0	0	0	0	0	0	0.440944	0	0	0	0	0	0	0	0.558462	0	0
'gene-FOLR1'	0	0.678379	0	0	0	0	0	0	0	0	0	0.477805	0	0	1.31238	0	3.0137	0	0.550601	0	0
'CD68'	0	0	0	0	0	0	0	0	0	0	0	0	0	0	0.254079	0	1.79913	0	0.542571	0	0
'STK17B'	0	0	0.282361	0	0	0	0	0	0	0	0	0	0	0	1.42695	1.95309	0.967274	0	0.52235	0	0
'TLR2'	0	0	0	0	0	0	0	0	0	0	0	0	0	0	0.795296	0	0.957161	0	0.515237	0	0
'SLC11A1'	0	0	0	0	0	0	0	0	0	0	0	0	0	0	0	0	0.275615	0	0.483935	0	0
'KIT'	0	0	0	0	0	0	0	0	0	0	0	0	0	0	0	0.455348	0	0	0.48063	0	0
'C3AR1'	0	0	0	0	0	0	0	0	0	0	0	0	0	0	0	0	0.977533	0	0.479851	0	0
'RBM34'	0	0	0	0	0	0	0	0	0	0	0	0	0	0	0.447705	0	0	0	0.477351	0	0
'PIK3R5'	0	0	0	0	0	0	0	0	0	0	0	0	0	0	1.05617	0.386783	0.694583	0	0.46095	0	0
'FAM110A'	0	0	0	0	0	0	0	0	0	0	0	0	0	0	0.957508	0	0.263406	0	0.457629	0	0
'DOCK10'	0	0	0	0	0	0	0	0	0	0	0.25107	0	0	0	0.805883	1.02726	1.02288	0	0.456977	0	0
'SWAP70'	0	0	0	0.47723	0	0	0	0.686022	0	0	0.355866	0	0	0	0	0	0	0	0.455536	0	0
'GIMAP4'	0	0	0	0	0	0	0	0	0	0	0	0	0	0	0.270258	0	0.993096	0	0.451716	0	0
'PLEK2'	0	0	0	0	0	0	0	0	0	0	0	0	0	0	0	0	0	0	0.449153	0	0
'TSPAN13'	0	0	0	0.96167	0.578075	0	0	1.44343	0	0	0	0	0	0	0	0	0	0	0.448047	0	0
'STK4'	0	0	0	0	0	0	0	0	0	0	0	0	0	0	1.46496	1.18159	0.323473	0	0.446043	0	0
'PARP14'	0	0	0	0.54718	0	0	0	0.402395	0	0	0	0	0	0	0	0	0	0	0.445904	0	0
'UBASH3B'	0	0	0	0	0	0	0	0	0	0	0	0	0	0	0.48282	0.315142	0.716183	0	0.444923	0	0
'TANK'	0	0	0	0	0	0	0	0	0	0	0	0	0	0	1.34797	0.703963	0.291978	0	0.440911	0	0
'FGD4'	0	0	0	0	0	0	0	0.344924	0	0	0.395187	0	0	0	0	0	0.275032	0	0.436465	0	0
'SLC37A2'	0	0	0	0	0	0	0	0	0	0	0	0	0	0	0	0	0.636966	0	0.434471	0	0
'LCP2'	0	0	0	0	0	0	0	0	0	0	0	0	0	0	0.33331	0.76488	0.543223	0	0.434442	0	0
'DHRS9'	0	0	0	0	0	0	0	0	0	0	0	0	0	0	0.466016	0	0.475446	0	0.423569	0	0
'LOC100520491'	0	0	0	0	0	0	0	0	0	0	0	0	0	0	0.818427	1.27371	1.02139	0	0.422547	0	0
'IFITM1'	0	0	0	1.13236	0.64082	0	0	1.29191	0	0	0	0	0	0	0	0	0	0	0.421439	0	0
'CTSB'	0	0	0	0	0.455436	0	0	0	0.560636	0.438738	0	0	0	0	1.30161	0	2.30053	0	0.418263	0	0
'DNAJA1'	0	0	0	0.733942	0	0	0	1.01226	0	0	0	0	0	0	0	0.497993	0.572044	0	0.414288	0	0
'IFI30'	0	0.799137	0	0	0	0	0	0	0.740036	0.382606	0	0	0.457741	0	1.51785	0	1.87343	0	0.40583	0	0
'CTNNAL1'	0	0	0	0.329103	0.26933	0	0	1.2252	0	0	0	1.22451	0	0	0	0	0	0	0.402699	0	0
'PTGS2'	0	0	0	0	0	0.433117	0.606971	0	0	0	0	0	0	0	0.969898	0.683949	0	0	0.390203	0	0
'AMPD3'	0	0	0	0	0	0	0	0	0	0	0	0	0	0	0.632106	0	0	0	0.388535	0	0
'DNASE2'	0	0	0	0	0	0	0	0	0	0	0	0	0	0	0.30038	0.265591	1.31974	0	0.387006	0	0
'CTR9'	0	0	0	0	0.288853	0	0	0	0	0	0.418291	0	0	0	0	0.682152	0	0	0.386978	0	0
'LOC100624191'	0	0	0	0	0	0	0	0	0	0	0	0	0	0	0.769458	0.576113	0.901649	0	0.386692	0	0
'TIPARP'	0	0	0	0	0	0.659406	0.293189	0.45783	0	0	0	0	0	0	1.04593	0.572748	0.319349	0	0.384891	0	0
'GP91-PHOX'	0	0	0	0	0	0	0	0	0	0	0	0	0	0	0.389569	0	1.00402	0	0.377728	0	0
'CHD2'	0	0	0	0	0	0	0	0	0	0	0.497131	0.309631	0	0	0.410898	0.82155	0.596668	0	0.37301	0	0
'ICAM1'	0	0	0	0.564504	0.814148	0.27556	0	0.628524	0	0	0.714121	0	0	0	0.442515	0	0	0	0.368764	0	0
'LOC100153163'	0	0	0	0	0	0	0	0	0	0	0	0	0	0	0.331356	0.73447	0	0	0.367483	0	0
'SBNO1'	0	0	0	0	0	0	0	0	0	0	0	0	0	0	0	0	0	0	0.360713	0	0
'TOR1AIP1'	0	0	0	0	0	0	0	0	0	0	0.380418	0	0	0	0.360267	0.314758	0.34372	0	0.358328	0	0
'MARCH1'	0	0	0	0	0	0	0	0	0	0	0.424267	0	0	0	0.622668	0	0.614173	0	0.347401	0	0
'HERC1'	0	0	0	0	0	0	0	0	0	0	0	0	0	0	0	0	0.467409	0	0.344544	0	0
'NUS1'	0	0	0	0	0	0	0	0	0	0	0	0	0	0	0.62933	0	0	0	0.333458	0	0
'EMILIN2'	0	0.427922	0	0	0	0	0	0	0	0	0	0	0	0	1.26849	0	1.17963	0	0.323886	0	0
'DDIT4'	0	0.681764	0	0	0.662042	0	0	0	0	0	0	1.23786	0	0	0	0.608498	0.281186	0	0.32166	0	0
'PTGDR'	0	0	0	0	0	0	0	0	0	0	0	0	0	0	0	0	0	0	0.320314	0	0
'SELE'	0	0	0	0	2.50839	0	0	0	0	0	0.683636	0	0	0	0	0	0	0	0.316703	0	0
'LOC110256370'	0	0	0	0	0	0	0	0	0	0	0	0	0	0	0	0	0	0	0.31433	0	0
'BAZ1A'	0	0	0	0.265237	0	0.335437	0	0	0	0	0.384009	0	0	0	1.36309	0.606892	0.376006	0	0.307424	0	0
'ITPR2'	0	0	0	0.431201	0.620043	0	0	0.606603	0	0	1.29693	0.324724	0	0	0	0	0	0	0.302612	0	0
'PRKAR2A'	0	0	0	0	0	0	0	0	0	0	0.279219	0	0	0	0.336939	0	1.14301	0	0.301395	0	0
'SLC39A8'	0	0	0	0	0.518166	0	0	0	0	0	0	0	0	0	0.257943	0	0	0	0.300913	0	0
'PTPN6'	0	0	0	0	0	0	0	0	0	0	0	0	0	0	0	0.27478	0.529347	0	0.300531	0	0
'IRF8'	0	0	0	0	0	0	0	0	0	0	0	0.313533	0	0	1.33995	0.322143	1.31924	0	0.299379	0	0
'CD55'	0	0.304345	0	0	0	0	0	0	0.653098	0.698854	0	0	0.581183	0	0	0	0	0	0.297268	0	0
'CDH5'	0	0	0	1.0158	0.674367	0	0	1.09835	0	0	0.662735	0.611618	0	0	0	0	0	0	0.29699	0	0
'NPC1'	0	0	0	0	0	0	0	0	0	0	0	0	0	0	0	0	0.48786	0	0.294481	0	0
'DBF4'	0	0	0	0	0	0	0	0	0	0	0	0	0	0	0	0	0	0	0.29125	0	0
'HMGXB4'	0	0	0	0	0	0	0	0	0	0	0	0	0	0	0.271686	0.296209	0	0	0.286233	0	0
'CHST11'	0	0	0	0	0	0	0	0	0	0	0.483426	0	0	0	0	0.493132	0	0	0.272526	0	0
'CEP112'	0	0	0	0	0	0	0	0.62689	0	0	0	0	0	0	0	0	0	0	0.265255	0	0
'JAK2'	0	0	0	0	0	0	0	0	0	0	0	0	0	0	0.29632	0	0	0	0.261992	0	0
'LOC110262100'	0	0	0	0	0	0	0	0	0	0	0.529633	0	0	0	0	0	0	0	0.256406	0	0
'MFSD12'	0	0	0	0.393326	0	0	0	0.484631	0	0	0	0	0	0	0.677957	0	0	0	0.256293	0	0
'SETX'	0	0	0	0.376997	0	0	0	0	0	0	0.304786	0	0	0	0	0	0	0	0.254371	0	0
'LGMN'	0	0	0	0.414926	0.315345	0	0	0	0	0	0	0.454474	0	0	0.545359	0	2.0721	0	0.253151	0	0
'gene-C4BPA-2'	0	0	0	0	0	0	0	0	0	0	0	0	0	0	0	0	3.81058	0	0	0	0
'CST3'	0	0.86645	0	0	0	0	0	0	0.639691	0.520768	0	0	0.321132	0	3.15783	0	2.65242	0	0	0	0
'CCL14'	0	0	0	0	0	0	0	0	0	0	0	0	0	0	0	0	2.3126	0	0	0	0
'MRC1'	0	0	0	0	0	0	0	0	0	0	0	0.792111	0	0	0.839227	0	2.06244	0	0	0	0
'F13A1'	0	0	0	0	0	0	0	0	2.62227	0.693219	0	0	0	0	0.291174	0	1.90991	0	0	0	0
'HMOX1'	0	0	0	0	0	0	0	0	0	0	0	0	0	0	0.783358	0	1.6056	0	0	0	0
'CTSH'	0	0.947952	0	0	0	0	0	0	0.602377	0	0	0	0	0	1.3758	0	1.57312	0	0	0	0
'ACP5'	0	0	0	0	0	0	0	0	0	0	0	0.444253	0	0	0	0.390118	1.56981	0	0	0	0
'HSPA6'	0	0.253767	0	0	0.365002	0	0	0	0	0	0	0.376729	0	0	0.613842	0	1.53965	0	0	0	0
'PHACTR1'	0	0	0	0	0	0	0	0	0	0	0.794505	0	0	0	2.39636	0.644404	1.40417	0	0	0	0
'GPR183'	0	0	0	0	0	0	0	0	0	0	0	0	0	0	3.11855	3.34344	1.40266	0	0	0	0
'PLEKHO1'	0	0	0	0.769735	0.721879	0	0	0.312138	0	0	0.293934	0	0	0	0.811388	0	1.38676	0	0	0	0
'JAML'	0	0	0	0	0	0	0	0	0	0	0	0	0	0	2.02556	0.839811	1.34853	0	0	0	0
'METRNL'	0	0.921178	0	0	0	0	0	0	0.648893	0	0	0	0.340969	0	0.83364	0.31777	1.33109	0	0	0	0
'SELENOP'	0	0.942088	0	0	0	0	0	0.380853	0.893286	1.03233	0	0	0.569928	0	0	0	1.19003	0	0	0	0
'GPNMB'	0	0	0	0	0	0	0	0	0.700136	0.319851	0	0	0.344032	0	0	0	1.17268	0	0	0	0
'LAT2'	0	0.251121	0	0	0	0	0	0	0	0	0	0	0	0	0.655309	0.374895	1.15184	0	0	0	0
'DAB2'	0	0.579702	0	0	0	0	0	0	0.330313	0.607835	0	0	0	0	0	0	1.08243	0	0	0	0
'COLEC12'	0	0	0	0	0	0	0	0	0.741465	0.862124	0	0	0.467828	0	0	0	1.0617	0	0	0	0
'GLRX'	0	0	0	0	0	0	0	0	0	0	0	0	0	0	2.14997	0.520237	0.95502	0	0	0	0
'SERPINB1'	0	0	0	0	0	0	0	0	0	0	0	0	0	0	2.65285	0	0.927353	0	0	0	0
'CSF2RA'	0	0	0	0	0	0	0	0	0	0	0	0	0	0	1.83542	0	0.866924	0	0	0	0
'CSF2RB'	0	0	0	0.6741	0.458516	0	0	0.601683	0	0	0.333251	0	0	0	1.13446	0.650629	0.861759	0	0	0	0
'ARHGAP22'	0	0	0	0	0	0	0	0	0	0	0	0	0	0	0.510148	0	0.860504	0	0	0	0
'MSR1'	0	0	0	0	0	0	0	0	0	0	0	0	0	0	0	0	0.852509	0	0	0	0
'FRMPD4'	0	0	0	0	0	0	0	0	0	0	0.43995	0	0	0	0.360347	0	0.850656	0	0	0	0
'IL1B'	0	0	0	0	0	0	0	0	0	0	0	0	0	0	3.07488	0	0.833902	0	0	0	0
'ARL4C'	0	0	0	0	0	0	0	0	0	0	0	0	0	0	1.58384	0.643562	0.815537	0	0	0	0
'IGF1'	0	0	0	0	0	0	0	0	0	0.66685	0	0.543237	0.939285	0	0	0	0.811841	0	0	0	0
'FNIP2'	0	0	0	0	0	0	0	0	0	0	0.278066	0	0	0	0.832458	0.34832	0.777734	0	0	0	0
'RFTN1'	0	0	0	0	0	0	0	0	0	0	0	0	0	0	1.0188	0.401102	0.771228	0	0	0	0
'FAM81A'	0	0	0	0	0	0	0	0	0	0	0	0	0	0	0.31247	0	0.753016	0	0	0	0
'FGD2'	0	0	0	0	0	0	0	0	0	0	0	0	0	0	0.747021	0	0.745976	0	0	0	0
'CFD'	0	1.33684	0	0	0	0	0	0	0.774181	1.33671	0	0	0.300773	0	0	0	0.703212	0	0	0	0
'DNAH2'	0	0	0	0	0	0	0	0	0	0	0	0	0	0	0.486249	0	0.699339	0	0	0	0
'PDE7B'	0	0	0	0	0	0	0	0	0	0	0.562403	0	0	0	0	0.314238	0.679568	0	0	0	0
'ITSN1'	0	0.373888	0	0	0	0	0	0	0.319845	0.497448	0	0	0	0	0	0	0.658864	0	0	0	0
'GLIS3'	0	0	0	0	0	0	0	0	0	0.272104	0.371465	0.63226	0	0	0	0	0.637208	0	0	0	0
'IL1A'	0	0	0	0	0	0	0	0	0	0	0	0	0	0	2.18615	0	0.633639	0	0	0	0
'RUNX1'	0	0	0	0	0	0.900455	0.554749	0	0	0	0	0	0	0	1.22532	0.340979	0.628766	0	0	0	0
'SNX30'	0	0	0	0	0	0	0	0	0	0	0	0	0	0	0	0	0.6197	0	0	0	0
'EPB41L3'	0	0.254248	0	0	0	0	0	0	0	0	0	0	0	0	0.329435	0	0.611226	0	0	0	0
'RETREG1'	0	0.279872	0	0	0	0	0	0	0.31766	0	0	0	0	0	0	0.463006	0.584864	0	0	0	0
'G0S2'	0	0	0	0	0	0	0	0	0	0	0	0	0	0	0	0	0.583104	0	0	0	0
'DNASE1L3'	0	0	0	0	0	0	0	0	0	0	0	0.415832	0	0	1.22562	0	0.574315	0	0	0	0
'RAB7B'	0	0	0	0	0	0	0.580431	0	0	0	0	0	0	0	0.655609	0	0.572337	0	0	0	0
'P2RY12'	0	0	0	0	0	0	0	0	0	0	0	0	0	0	0.371875	0	0.56659	0	0	0	0
'ADAM8'	0	0	0	0	0	0	0	0	0	0	0	0	0	0	1.18255	0.605732	0.565501	0	0	0	0
'TGFB1'	0	0	0	0.283268	0	0	0	0	0	0	0	0	0	0	1.72587	1.26471	0.559205	0	0	0	0
'SSH2'	0	0	0	0	0	0	0	0	0	0	0.583868	0.292338	0	0	0	0.351684	0.555416	0	0	0	0
'HACD4'	0	0	0	0	0	0	0	0	0.559507	0	0	0	0	0	0.305817	0	0.553482	0	0	0	0
'LOC110255652'	0	0	0	0	0	0	0	0	0	0	0.369977	0	0	0	0.634965	0	0.551382	0	0	0	0
'TESK2'	0	0	0	0	0	0	0	0	0	0	0	0	0	0	0.284118	0.967169	0.547249	0	0	0	0
'EMR4'	0	0	0	0	0	0	0	0	0	0	0	0	0	0	0.594393	0	0.545572	0	0	0	0
'SLC9A9'	0	0	0	0	0	0	0	0	0	0.259327	0.455658	0.336795	0	0	0	0	0.524517	0	0	0	0
'TFEC'	0	0	0	0	0	0	0	0	0	0	0	0	0	0	0.405264	0	0.501007	0	0	0	0
'CCSER1'	0	0	0	0.374841	0.332139	0	0	0.591477	0	0	1.334	0	0	0	0.274513	0	0.484643	0	0	0	0
'LOC100511343'	0	0	0	0	0	0	0	0	0	0	0	0	0	0	0	0	0.483485	0	0	0	0
'XYLT1'	0	0.564955	0	0	0	0	0	0	0.435995	0.27567	0.291776	0	0	0	0.632415	0.381559	0.481725	0	0	0	0
'PLA2G7'	0	0	0	0	0	0	0	0	0.812183	0	0	0	0	0	0	0	0.480855	0	0	0	0
'HCAR2'	0	0	0	0	0	0	0	0	0	0	0	0	0	0	0.346915	0	0.471719	0	0	0	0
'BCAT1'	0	0.263201	0	0	0	0	0	0	0	0	0	0	0	0	0	0	0.470479	0	0	0	0
'FMN1'	0	0	0	0	0	0	0	0	0.394072	0	0.34129	0	0	0	0	0	0.470466	0	0	0	0
'PTPRE'	0	0	0	0.847585	0.318496	0	0	0.321013	0	0	1.41272	0.408461	0	0	0.743473	0	0.46797	0	0	0	0
'ARHGAP18'	0	0	0	0	0	0	0	0	0	0	0	0	0	0	0.388587	0	0.454327	0	0	0	0
'ARHGAP24'	0	0.521256	0	0	0	0	0	0	0.3082	0	0.336709	0	0	0	0	0	0.452101	0	0	0	0
'TANC2'	0	0	0	0	0	0	0	0	0	0	0.383447	0.807468	0	0	0.290557	0	0.447933	0	0	0	0
'DNM1'	0	0.428878	0	0	0	0	0	0	0.526582	0.347227	0	0	0.36638	0	0	0	0.429046	0	0	0	0
'PPARG'	0	0	0	0	0	0.627968	0	0	0	0	0.317294	0	0	0	0	0	0.409313	0	0	0	0
'SLC46A2'	0	0	0	0	0	0	0	0	0	0	0	0	0	0	0	0	0.405397	0	0	0	0
'NCEH1'	0	0.311751	0	0	0	0	0	0	0	0	0	0	0	0	0	0	0.400491	0	0	0	0
'DAPK1'	0	0	0	0	0	0	0	0	0	0	0	1.66505	0	0	0.48346	0	0.393656	0	0	0	0
'SDCCAG8'	0	0	0	0	0	0	0	0	0	0	0.303024	0	0	0	0	0	0.391997	0	0	0	0
'AREG'	0	0	0	0	0	0	0	0	0	0	0	0	0	0	1.65054	0	0.380762	0	0	0	0
'FAM102B'	0	0.590995	0	0	0	0	0	0	1.05298	0.748773	0	0	0.484389	0	0.307654	0	0.376899	0	0	0	0
'HDAC4'	0	0	0	0	0	0	0	0	0	0	0.251461	0	0	0	0.322952	0	0.371425	0	0	0	0
'ZC3H12C'	0	0	0	0	0	0	0	0	0	0	0	0	0	0	0.889599	0	0.368696	0	0	0	0
'BTBD9'	0	0	0	0	0	0	0	0	0	0	0.604657	0	0	0	0	0.411411	0.367794	0	0	0	0
'DYNC1I1'	0	0	0	0	0	0	0	0	0	0	0.378158	0	0	0	0.465078	0	0.363707	0	0	0	0
'ARHGAP15'	0	0	0	0	0	0	0	0	0	0	0.501762	0	0	0	0	0.582194	0.362065	0	0	0	0
'SLC40A1'	0	0.323083	0	0	0	0	0	0	0.256681	0	0	0	0.332653	0	0	0	0.352243	0	0	0	0
'DOCK4'	0	0	0	0.314253	0.45865	0	0	0	0	0	1.23367	0.449523	0	0	0	0	0.350999	0	0	0	0
'MCTP1'	0	0	0	0.381179	0.322184	0	0	1.12244	0	0	1.21174	0	0	0	0	0	0.344077	0	0	0	0
'CSNK1G1'	0	0	0	0	0	0	0	0	0	0	0.470147	0	0	0	0	0	0.33995	0	0	0	0
'VASH2'	0	0	0	0	0	0	0	0	0	0	0	0.253575	0	0	0.467731	0	0.331472	0	0	0	0
'NINJ1'	0	0	0	0	0	0	0	0	0	0	0	0	0	0	1.52921	0	0.331424	0	0	0	0
'ZFAND2A'	0	0	0	0	0	0	0	0	0	0	0	0	0	0	0.457033	0	0.320979	0	0	0	0
'MBOAT1'	0	0	0	0	0	0	0	0	0	0	0	0	0	0	0	0	0.320557	0	0	0	0
'MYO5A'	0	0	0.261616	0	0	0	0.254881	0	0	0	0	0	0	0	0	0	0.300997	0	0	0	0
'IGSF6'	0	0	0	0	0	0	0	0	0	0	0	0	0	0	0	0	0.300084	0	0	0	0
'NAV3'	0	0	0	0	0	0	0	0	0	0.300999	0.615814	0	0	0	0	0	0.30001	0	0	0	0
'PIK3CB'	0	0	0	0	0	0	0	0	0	0	0	0	0	0	0.418287	0	0.294921	0	0	0	0
'RAPGEF6'	0	0	0	0	0	0	0	0	0	0	0.430019	0	0	0	0.921893	0.651715	0.292229	0	0	0	0
'TFIP11'	0	0	0	0	0	0	0	0	0	0	0	0	0	0	0	0	0.286071	0	0	0	0
'CXCR4'	0	0	0	0	0	0	0	0	0	0	0	0	0	0	0.788709	1.40701	0.284278	0	0	0	0
'ACOT11'	0	0	0	0	0	0	0	0	0	0	0	0	0	0	0.386763	0	0.283243	0	0	0	0
'LACC1'	0	0	0	0	0	0	0	0	0	0	0	0	0	0	0	0	0.280168	0	0	0	0
'PIKFYVE'	0	0	0	0	0	0	0	0	0	0	0	0	0	0	1.32848	0	0.278189	0	0	0	0
'NIN'	0	0	0	0.310557	0	0	0	0	0	0	0	0	0	0	0.362665	0	0.277536	0	0	0	0
'IPCEF1'	0	0	0	0	0	0	0	0	0	0	0	0	0	0	0	0.34967	0.276471	0	0	0	0
'HUNK'	0	0	0	0	0	0	0	0	0	0	0	0	0	0	0	0	0.269252	0	0	0	0
'GALNTL5'	0	0	0	0	0	0	0	0	0	0	0	0	0	0	0	0	0.263825	0	0	0	0
'MERTK'	0	0	0	0	0	0	0	0.394806	0	0	0.476495	0	0	0	0	0	0.256353	0	0	0	0
'HIVEP3'	0	0	0	0	0	0	0	0	0	0	0	0	0	0	0.305527	0	0.253844	0	0	0	0
'ELMSAN1'	0	0	0	0	0	0	0	0	0	0	0.294059	0	0	0	0	0	0.252127	0	0	0	0
'TEC'	0	0	0	0	0	0	0	0	0	0	0.269691	0	0	0	0.653489	0	0.251901	0	0	0	0
'CCR7'	0	0	0	0	0	0	0	0	0	0	0	0	0	0	2.2834	0.317113	0	0	0	0	0
'ETV3'	0	0	0	0	0	0.450766	0.543494	0	0	0	0	0	0	0	1.59162	0	0	0	0	0	0
'SLC7A11'	0	0	0	0	0	0	0	0	0	0	0	0	0	0	1.57206	0	0	0	0	0	0
'PKIB'	0	0	0	0	0	0	0	0	0	0	0	0	0	0	1.36243	0	0	0	0	0	0
'DUSP5'	0	0	0	0.706232	0.390012	0	0	0.845631	0	0	0.265014	0	0	0	1.11423	0	0	0	0	0	0
'FLT3'	0	0	0	0	0	0	0	0	0	0	0	0	0	0	1.03562	0	0	0	0	0	0
'RALA'	0	0	0	0.378038	0.573177	0	0	0	0	0	0	0.473428	0	0	1.03309	0	0	0	0	0	0
'DEPDC7'	0	0	0	0	0	0	0	0	0	0	0	0	0	0	0.907175	0	0	0	0	0	0
'CYLD'	0	0	0	0	0	0	0	0	0	0	0	0	0	0	0.89678	0	0	0	0	0	0
'SMPDL3B'	0	0	0	0	0.39075	0	0	0	0	0	0.353724	0.344054	0	0	0.89066	0	0	0	0	0	0
'MREG'	0	0	0	0	0	0	0	0	0	0	0	0	0	0	0.884657	0	0	0	0	0	0
'GPR132'	0	0	0	0	0	0	0	0	0	0	0	0	0	0	0.880021	0.568147	0	0	0	0	0
'IRF4'	0	0	0	0	0	0	0	0	0	0	0	0	0	0	0.858572	0.412868	0	0	0	0	0
'DAPP1'	0	0	0	0	0	0	0	0	0	0	0	0	0	0	0.827439	0.271255	0	0	0	0	0
'IL7R'	0	0	0	0	0	0	0	0	0	0	0	0	0	0	0.825476	1.66907	0	0	0	0	0
'CNOT9'	0	0	0	0	0	0.252166	0	0	0	0	0.278408	0	0	0	0.802917	0.338901	0	0	0	0	0
'SLC38A1'	0	0	0	0	0	0	0	0	0	0	0.557207	0	0	0	0.751301	0.443273	0	0	0	0	0
'LOC110257903'	0	0	0	0	0	0	0	0	0	0	0	0	0	0	0.723812	0	0	0	0	0	0
'TRAFD1'	0	0	0	0	0	0	0	0	0	0	0	0	0	0	0.710494	0	0	0	0	0	0
'C1H15orf48'	0	0	0	0	0	0	0	0.503573	0	0	0	0	0	0	0.697295	0	0	0	0	0	0
'CD72'	0	0	0	0	0	0	0	0	0	0	0	0	0	0	0.623142	0	0	0	0	0	0
'DENND1B'	0	0	0	0	0	0	0	0	0	0	0	0	0	0	0.618118	1.3858	0	0	0	0	0
'MGAM'	0	0	0	0	0	0	0	0	0	0	0	0	0	0	0.600551	0	0	0	0	0	0
'SMC6'	0	0	0	0	0	0	0	0	0	0	0	0	0	0	0.584933	0	0	0	0	0	0
'STX3'	0	0	0	0	0	0	0	0	0	0	0	0	0	0	0.582048	0.309917	0	0	0	0	0
'NF2'	0	0	0	0	0	0	0	0	0	0	0	0	0	0	0.568689	0	0	0	0	0	0
'SNAPC1'	0	0	0	0.525014	0	0	0	0.493252	0	0	0.308443	0	0	0	0.524775	1.05291	0	0	0	0	0
'AHI1'	0	0	0	0	0	0	0	0	0	0	0.462915	0	0	0	0.489373	1.33593	0	0	0	0	0
'ITGB7'	0	0	0	0	0	0	0	0	0	0	0	0	0	0	0.486663	0.332961	0	0	0	0	0
'SPSB1'	0	0	0	0	0	0	0	0	0	0	0	0.519337	0	0	0.464305	0	0	0	0	0	0
'CHD1'	0	0	0	0.272508	0	0.43122	0	0	0	0	0	0	0	0	0.459735	0.332738	0	0	0	0	0
'CD274'	0	0	0	0	0	0	0	0	0	0	0	0	0	0	0.44693	0.259191	0	0	0	0	0
'FZD5'	0	0	0	0	0	0	0	0	0	0	0	0	0	0	0.406645	0	0	0	0	0	0
'UST'	0	0.504937	0	0	0	0	0	0	0.252988	0.387977	0	0	0	0	0.3988	0	0	0	0	0	0
'ST8SIA4'	0	0	0	0.276852	0	0.337413	0	0	0	0	0.301393	0	0	0	0.393174	1.21489	0	0	0	0	0
'DUSP4'	0	0	0	0	0	0	0	0	0	0	0	0	0	0	0.391718	0.306984	0	0	0	0	0
'CEP78'	0	0	0	0	0	0	0	0	0	0	0	0	0	0	0.370311	0	0	0	0	0	0
'SUCNR1'	0	0	0	0	0	0	0	0	0	0	0	0	0	0	0.33051	0	0	0	0	0	0
'KLHL8'	0	0	0	0	0	0	0	0	0	0	0	0	0	0	0.327425	0	0	0	0	0	0
'RNASE10'	0	0	0	0	0	0	0	0	0	0	0	0	0	0	0.32236	0	0	0	0	0	0
'LOC100525346'	0	0	0	0.416822	0	0.664551	0	0.261972	0	0	0	0	0	0	0.313317	0	0	0	0	0	0
'ARG1'	0	0	0	0	0	0	0	0	0	0	0	0	0	0	0.308795	0	0	0	0	0	0
'ANKRD37'	0	0	0	0	0	0	0	0	0	0	0	0	0	0	0.308769	0.341371	0	0	0	0	0
'RUNX2'	0	0	0	0	0	0	0	0	0	0	0	0	0.299864	0	0.295706	0.971274	0	0	0	0	0
'HAVCR2'	0	0	0	0	0	0	0	0	0	0	0	0	0	0	0.273053	0	0	0	0	0	0
'SV2C'	0	0	0	0	0	0	0	0	0	0	0.315693	0	0	0	0.270962	0.51089	0	0	0	0	0
'RUNX3'	0	0	0	0	0	0	0	0	0	0	0	0	0	0	0.269447	1.55353	0	0	0	0	0
'PTK2B'	0	0	0	0	0.448811	0	0	0	0	0	0.693141	0	0	0	0.261396	0	0	0	0	0	0
'SLC4A4'	0	0	0	0	0	0	0	0	0	0	0.311106	0	0	0	0.253749	0	0	0	0	0	0
'LOC102158411'	0	0	0	0	0	0	0	0	0	0	0	0	0	0	0	2.03695	0	0	0	0	0
'ITK'	0	0	0	0	0	0	0	0	0	0	0	0	0	0	0	1.50212	0	0	0	0	0
'EPHB6'	0	0	0	0	0	0	0	0	0	0	0	0	0	0	0	1.49412	0	0	0	0	0
'LAX1'	0	0	0	0	0	0	0	0	0	0	0	0	0	0	0	1.3935	0	0	0	0	0
'TNFAIP3'	0	0	0	0	0	0.584833	0.674503	0.254205	0	0	0.342073	0	0	0	0	1.39115	0	0	0	0	0
'SYTL3'	0	0	0	0	0	0	0	0	0	0	0	0	0	0	0	1.31115	0	0	0	0	0
'BLK'	0	0	0	0	0	0	0	0	0	0	0	0	0	0	0	1.06337	0	0	0	0	0
'VWA5A'	0	0	0	0	0	0	0	0	0	0	0	0	0	0	0	1.04899	0	0	0	0	0
'IKZF3'	0	0	0	0	0	0	0	0	0	0	0	0	0	0	0	0.974495	0	0	0	0	0
'TRAF5'	0	0	0	0	0	0	0	0	0	0	0	0	0	0	0	0.875979	0	0	0	0	0
'THOC2'	0	0	0	0	0	0	0	0	0	0	0	0	0	0	0	0.800468	0	0	0	0	0
'PAG1'	0	0	0	0	0	0	0.272782	0	0	0	0	0	0	0	0	0.753815	0	0	0	0	0
'BIN2'	0	0	0	0	0	0	0	0	0	0	0	0	0	0	0	0.748956	0	0	0	0	0
'ENPP3'	0	0	0.532196	0	0	0.291252	0	0	0	0	0	0	0	0	0	0.740626	0	0	0	0	0
'PARP8'	0	0	0	0	0	0	0	0	0	0	0	0	0	0	0	0.719094	0	0	0	0	0
'HDC'	0	0	0	0	0	0	0	0	0	0	0	0	0	0	0	0.7168	0	0	0	0	0
'GRAP2'	0	0	0	0	0	0	0	0	0	0	0	0	0	0	0	0.713674	0	0	0	0	0
'LOC100155195'	0	0	0	0	0	0	0	0.351153	0	0	0	0	0	0	0	0.71105	0	0	0	0	0
'PTPN22'	0	0	0	0	0	0	0	0	0	0	0	0	0	0	0	0.639597	0	0	0	0	0
'KCNQ5'	0	0	0	0	0	0	0	0	0	0	0.425639	0	0	0	0	0.626383	0	0	0	0	0
'IL18R1'	0	0	0	0	0	0	0	0	0	0	0	0	0	0	0	0.613523	0	0	0	0	0
'PDE3B'	0	0	0	0	0	0	0	0	0.291304	0	0	0	0	0	0	0.605635	0	0	0	0	0
'ISG15'	0	0	0	1.49714	0.28854	0	0	1.21593	0	0	0	0	0	0	0	0.585645	0	0	0	0	0
'FHL2'	0	0	0.532527	0	0	0	0	0	0	0	0	0	0	0.45112	0	0.559114	0	0	0	0	0
'LOC100156073'	0	0	0	1.01448	1.05288	0	0	0.874417	0	0	0.499718	0.94848	0	0	0	0.548164	0	0	0	0	0
'LTB'	0	0	0	0	0	0	0	0	0	0	0	0.329034	0	0	0	0.510385	0	0	0	0	0
'ST8SIA1'	0	0	0	0	0	0	0	0	0	0	0	0	0	0	0	0.509056	0	0	0	0	0
'STK26'	0	0	0	0	0	0	0	0	0	0	0	0	0	0	0	0.505987	0	0	0	0	0
'SLAMF1'	0	0	0	0	0	0	0	0	0	0	0	0	0	0	0	0.482267	0	0	0	0	0
'TRAF3'	0	0	0	0.289134	0	0	0	0.368764	0	0	0.421319	0	0	0	0	0.465375	0	0	0	0	0
'F2R'	0	0	0	0	0	0	0	0	0.655692	1.1851	0	0	1.35435	0	0	0.461843	0	0	0	0	0
'SPOCK2'	0	0	0	0.408753	0	0	0	1.62155	0.259887	0	0	0	0	0	0	0.453015	0	0	0	0	0
'CCDC88C'	0	0	0	0.285748	0	0	0	0.513436	0	0	0.271343	0	0	0	0	0.435549	0	0	0	0	0
'TRIB3'	0	0.344811	0	0	0	0	0	0	0	0	0	0	0	0	0	0.42163	0	0	0	0	0
'HPGDS'	0	0	0	0	0	0	0	0	0	0	0	0	0	0	0	0.418814	0	0	0	0	0
'ENC1'	0	0	0	0	0	0	0	0	0	0	0	0	0	0	0	0.415631	0	0	0	0	0
'FOXJ3'	0	0	0	0	0	0	0	0	0	0	0.285735	0	0	0	0	0.389904	0	0	0	0	0
'THSD7B'	0	0	0	0	0	0	0	0	0	0	0.599125	0	0	0	0	0.378395	0	0	0	0	0
'LIF'	0	0	0	0	0	0	0	0	0	0	0	0	0	0	0	0.351302	0	0	0	0	0
'GBP1'	0	0	0	0.916996	0.34588	0	0	1.00729	0	0	0.283054	0.429155	0	0	0	0.333434	0	0	0	0	0
'BDP1'	0	0	0	0	0	0	0	0	0	0	0.300325	0	0	0	0	0.327637	0	0	0	0	0
'METTL16'	0	0	0	0	0	0	0	0	0	0	0	0	0	0	0	0.325718	0	0	0	0	0
'TNFSF11'	0	0	0	0	0	0	0	0	0	0	0	0	0	0	0	0.305155	0	0	0	0	0
'CDC14A'	0	0	0	0	0	0	0	0	0	0	0.265248	0	0	0	0	0.28823	0	0	0	0	0
'TNN'	0	0	0	0	0	0	0	0	0	0	0	0	1.04939	0	0	0.285391	0	0	0	0	0
'ARAP2'	0	0	0	0	0	0	0.607067	0	0	0	0	0	0	0	0	0.284592	0	0	0	0	0
'ZNF292'	0	0	0	0	0	0	0	0	0	0	0	0	0	0	0	0.281308	0	0	0	0	0
'PPM1L'	0	0	0	0	0	0	0	0	0	0	0.424142	0	0	0	0	0.274628	0	0	0	0	0
'SPEF2'	0	0	0	0	0	0	0	0	0	0	0	0	0	0	0	0.264786	0	0	0	0	0
'SMCHD1'	0	0	0	0.451461	0	0	0	0.253981	0	0	0.69405	0	0	0	0	0.260404	0	0	0	0	0
'PPP3R1'	0	0.293203	0	0	0	0	0	0	0.312104	0	0	0	0	0	0	0.25823	0	0	0	0	0
'LOC110261122'	0	0	0	0	0	0	0	0	0	0	0.330481	0	0	0	0	0.2578	0	0	0	0	0
'CRABP1'	0	0	0	0	0	0	0	0	0.511343	0.290075	0	0	1.93945	0	0	0	0	0	0	0	0
'LAMA2'	0	0	0	0	0	0	0	0	1.20766	1.52786	0	0	1.74951	0	0	0	0	0	0	0	0
'F2RL2'	0	0.653962	0	0	0	0	0	0	0.92476	2.04658	0	0	1.64764	0	0	0	0	0	0	0	0
'APOE'	0	0	0	0	0	0	0.299838	0	0.327857	1.98412	0	0	1.51008	0	0	0	0	0	0	0	0
'TNC'	0	0	0	0	0	0	0	0	0	0	0	0	1.37408	0	0	0	0	0	0	0	0
'CNTN1'	0	0.400629	0	0	0	0	0	0	0.504725	0.375467	0	0	1.19863	0	0	0	0	0	0	0	0
'MFAP4'	0	0.933545	0	0	0	0	0	0	0.699087	0	0	0	1.1899	0	0	0	0	0	0	0	0
'APCDD1'	0	0	0	0.377582	0	0	0	0	0.806922	0.484511	0	0	1.13702	0	0	0	0	0	0	0	0
'LAMC3'	0	0	0	0	0	0	0.464115	0	0.886463	0.288702	0	0	1.08707	0	0	0	0	0	0	0	0
'DKK2'	0	0.29791	0.25684	0	0	0	0	0	0.471258	0.438169	0	0	1.07127	0	0	0	0	0	0	0	0
'PDGFRA'	0	0.490115	0	0	0	0	0	0	1.12153	1.29102	0	0	1.04839	0	0	0	0	0	0	0	0
'THBS2'	0	1.2081	0	0	0	0	0	0	1.84879	0	0	0	1.04499	0	0	0	0	0	0	0	0
'DCN'	0	2.52069	0	0	0	0	0	0	1.16151	1.01448	0	0	0.993887	0	0	0	0	0	0	0	0
'FBLN1'	0	1.22893	0	0	0	0	0	0	0	0.914247	0	0	0.950015	0	0	0	0	0	0	0	0
'IGFBP2'	0	0	0.566527	0	0	0.271132	0	1.1361	0	0	0	0	0.939629	0	0	0	0	0	0	0	0
'MMP2'	0	1.61846	0	0	0	0	0	0	0.992915	1.31214	0	0	0.93121	0	0	0	0	0	0	0	0
'SPON1'	0	0.671004	0	0	0	0	0	0	1.51992	0.542615	0	0	0.897304	0	0	0	0	0	0	0	0
'SND1'	0	0.539943	0	0	0	0	0	0	0.710477	0.400392	0	0	0.883939	0	0	0	0	0	0	0	0
'NTRK2'	0	1.17466	0	0	0	0	0	0	0.264799	1.53485	0	0	0.881147	0	0	0	0	0	0	0	0
'FBLN5'	0	0	0	0	0	0	0	0	0.42725	0.723094	0	0	0.877886	0	0	0	0	0	0	0	0
'ANPEP'	0	1.2794	0	0	0	0	0	0	0.487138	0.728041	0	0	0.871973	0	0	0	0	0	0	0	0
'LTBP2'	0	0	0	0	0	0	0	0	0.415871	0	0	0	0.829425	0	0	0	0	0	0	0	0
'FKBP10'	0	1.11815	0	0	0	0	0	0	1.00717	0	0	0	0.794394	0	0	0	0	0	0	0	0
'LRP1'	0	1.45196	0	0	0	0	0	0	1.14712	0.918329	0	0	0.790115	0	0	0	0	0	0	0	0
'ZNF366'	0	0	0	0	0.296415	0	0	0	0	0.88326	0.379921	0	0.78504	0	0	0	0	0	0	0	0
'RRBP1'	0	1.07963	0	0	0	0	0	0	0.659784	0.513881	0	0	0.729779	0	0	0	0	0	0	0	0
'POSTN'	0	3.00982	0	0	0	0	0	0	0.731097	0	0	0	0.720856	0	0	0	0	0	0	0	0
'DPT'	0	1.48001	0	0	0	0	0	0	1.12981	0.850734	0	0	0.708404	0	0	0	0	0	0	0	0
'FIBIN'	0	0	0	0	0	0	0	0	0.495403	0	0	0	0.689191	0	0	0	0	0	0	0	0
'CHD9'	0	0	0	0	0	0	0	0	0.290678	0.325535	0	0.405147	0.688919	0	0	0	0	0	0	0	0
'GLI2'	0	0	0	0	0	0	0	0	0	0.369182	0	0	0.659265	0	0	0	0	0	0	0	0
'LVRN'	0	0.590456	0	0	0	0	0	0	0.634478	0.679558	0	0	0.616935	0	0	0	0	0	0	0	0
'RARRES2'	0	1.12535	0	0	0	0	0	0	0.924955	0.750183	0	0	0.577423	0	0	0	0	0	0	0	0
'AEBP1'	0	1.91048	0	0	0	0	0	0	1.00462	0.454786	0	0	0.575665	0	0	0	0	0	0	0	0
'LOC100519808'	0	0.396642	0	0	0	0	0	0	0.475947	0.265743	0	0	0.575482	0	0	0	0	0	0	0	0
'PPL'	0	0.599517	0	0	0	0	0	0	1.0151	0.98745	0	0.412394	0.564134	0	0	0	0	0	0	0	0
'CPXM1'	0	1.11652	0	0	0	0	0	0	0.56506	0	0	0	0.560216	0	0	0	0	0	0	0	0
'HMCN1'	0	0	0	0	0	0	0	0	0.921057	0	0.3245	0	0.544488	0	0	0	0	0	0	0	0
'MAML2'	0	0.526812	0	0	0	0	0	0	0.756744	0.393003	0.422245	0	0.540677	0	0	0	0	0	0	0	0
'FAM180A'	0	1.88544	0	0	0	0	0	0	1.24196	0	0	0	0.525885	0	0	0	0	0	0	0	0
'CTSK'	0	1.61502	0	0	0	0	0	0	0.855523	0.967704	0	0	0.524267	0	0	0	0	0	0	0	0
'MAGED1'	0	0.791028	0	0	0	0	0	0	0.338464	0	0	0	0.5164	0	0	0	0	0	0	0	0
'NEGR1'	0	0	0	0	0	0	0	0	0	1.23441	0.437245	0	0.516327	0	0	0	0	0	0	0	0
'MRC2'	0	1.65357	0	0	0	0	0	0	0.889951	0.628125	0	0	0.515625	0	0	0	0	0	0	0	0
'SLIT2'	0	0.65737	0	0	0	0	0	0	0.466283	0.437148	0	0	0.51533	0	0	0	0	0	0	0	0
'CHD5'	0	0.806493	0	0	0	0	0	0	0.353801	0	0	0	0.490572	0	0	0	0	0	0	0	0
'CYBRD1'	0	1.33177	0	0	0	0	0	0	0.499761	0.741637	0	0	0.486854	0	0	0	0	0	0	0	0
'COL12A1'	0	1.47718	0	0	0	0	0	0	0.52893	0	0	0	0.483943	0	0	0	0	0	0	0	0
'TMEM132C'	0	0	0	0	0	0	0	0	0	0	0.39584	0	0.483463	0	0	0	0	0	0	0	0
'SETBP1'	0	0.436717	0	0	0	0	0	0	0	0.368486	0	0	0.471889	0	0	0	0	0	0	0	0
'CFAP161'	0	0	0	0	0	0	0	0	0	0	0	0	0.471048	0	0	0	0	0	0	0	0
'HAPLN1'	0	0	0	0	0	0	0	0	0	0	0	0	0.470158	0	0	0	0	0	0	0	0
'HPSE2'	0	0	0	0	0	0	0	0	0.309369	0.560531	0.463013	0	0.453281	0	0	0	0	0	0	0	0
'LOC100520216'	0	0	0	0	0	0	0	0	0.437789	1.5613	0	0	0.449178	0	0	0	0	0	0	0	0
'COL13A1'	0	0	0	0.290666	0	0	0	0	0	0	0	0	0.42929	0	0	0	0	0	0	0	0
'C1R'	0	1.27602	0	0	0	0	0	0	0.567349	1.50448	0	0	0.429023	0	0	0	0	0	0	0	0
'SDCBP2'	0	0	0	0	0	0	0	0	0.324651	0	0	0	0.427048	0	0	0	0	0	0	0	0
'LRRN4CL'	0	1.02389	0	0	0	0	0	0	0.925949	0.965874	0	0.571768	0.423289	0	0	0	0	0	0	0	0
'COL21A1'	0	0.49537	0	0	0	0	0	0	0.480278	0.509963	0.302711	0	0.419878	0	0	0	0	0	0	0	0
'OGN'	0	1.78539	0	0	0	0	0	0	0	0.570831	0	0	0.416257	0	0	0	0	0	0	0	0
'PI16'	0	2.30539	0	0	0	0	0	0	0	0	0	0	0.414747	0	0	0	0	0	0	0	0
'CGNL1'	0	0.623795	0	0	0	0	0	0	0.473066	0.34115	0	0	0.411904	0	0	0	0	0	0	0	0
'ADAM12'	0	0	0	0	0	0	0	0	0	0	0	0	0.410748	0	0	0	0	0	0	0	0
'TDRD12'	0	0	0	0	0	0	0	0	0	0	0	0	0.410043	0	0	0	0	0	0	0	0
'GALNT15'	0	0.271496	0	0.326058	0	0	0	0.505712	0	0.310888	0	0	0.402766	0	0	0	0	0	0	0	0
'GRIA2'	0	0	0	0	0	0	0	0	0.552859	0.288071	0	0	0.402096	0	0	0	0	0	0	0	0
'NT5E'	0	1.00876	0	0	0	0	0	0	0.963671	0	0	0	0.399781	0	0	0	0	0	0	0	0
'IL17RD'	0	0	0	0	0.335152	0	0	0	0	0.484077	0	0	0.399586	0	0	0	0	0	0	0	0
'FN1'	0	1.49184	0	0	0	0	0	0	0.562237	1.55457	0	0	0.397499	0	0	0	0	0	0	0	0
'DPEP1'	0	0.577903	0	0	0	0	0	0	0	0	0	0	0.396775	0	0	0	0	0	0	0	0
'PLXDC1'	0	1.44928	0	0	0	0	0	0	0.630382	0.638747	0	0	0.395793	0	0	0	0	0	0	0	0
'PDPN'	0	0.611574	0	0	0	0	0	0	1.16174	0.633495	0	1.6252	0.393461	0	0	0	0	0	0	0	0
'LONRF3'	0	0.27086	0	0	0	0	0	0	0.307614	0	0	0	0.393257	0	0	0	0	0	0	0	0
'MGP'	0	1.95899	0	0	0	0	0	0	0.574387	1.17452	0	0	0.392995	0	0	0	0	0	0	0	0
'NKTR'	0	0	0	0	0	0	0	0	0	0	0	0	0.392866	0	0	0	0	0	0	0	0
'MMP16'	0	0.282881	0	0	0	0	0	0	0.455885	0.566818	0	0	0.3915	0	0	0	0	0	0	0	0
GPC3'	0	0	0.698734	0	0	0	0.748009	0	0	1.10061	0	0	0.383466	0	0	0	0	0	0	0	0
'NUPR1'	0	1.5522	0	0	0	0	0	0	1.04833	0.255447	0	0.301043	0.381167	0	0	0	0	0	0	0	0
'ROR1'	0	0	0	0	0	0	0	0	0.347152	0.575205	0	0	0.37296	0	0	0	0	0	0	0	0
'TBX3'	0	0	0	0.546804	0	0	0	0	0	0	0	0	0.371047	0	0	0	0	0	0	0	0
'COL14A1'	0	2.47872	0	0	0	0	0	0	1.2525	0.414365	0	0	0.362261	0	0	0	0	0	0	0	0
'C1S'	0	0.534131	0	0	0	0	0	0	0	2.0261	0	0	0.361448	0	0	0	0	0	0	0	0
'LOC106508546'	0	0.730764	0	0	0	0	0	0	0	0.283051	0.38431	0	0.358924	0	0	0	0	0	0	0	0
'SVEP1'	0	1.22857	0	0	0	0	0	0	0.652743	0	0	0	0.35791	0	0	0	0	0	0	0	0
'VPS13C'	0	0.424798	0	0	0	0	0	0	0.352786	0	0	0	0.357452	0	0	0	0	0	0	0	0
'ASPN'	0	0.390788	0.542102	0	0	0.360534	0	0	0	0	0	0	0.35689	0	0	0	0	0	0	0	0
'MME'	0	0	0	0	0	0	0	0	0	0.548739	0	0	0.352696	0	0	0	0	0	0	0	0
'GFPT2'	0	1.02816	0	0	0	0	0	0	0.287198	0.718479	0	0	0.349974	0	0	0	0	0	0	0	0
'ADAMTS2'	0	1.38887	0	0	0	0	0	0	0.571547	0	0	0	0.346233	0	0	0	0	0	0	0	0
'AK5'	0	0	0	0	0	0	0	0	0	0	0.275884	0	0.341541	0	0	0	0	0	0	0	0
'FBXO24'	0	2.18632	0	0	0	0	0	0	0.617848	0.372817	0	0	0.338418	0	0	0	0	0	0	0	0
'TRIM56'	0	0	0	0	0	0	0	0	0	0	0	0.264646	0.338376	0	0	0	0	0	0	0	0
'CEP290'	0	0	0	0	0	0	0	0	0	0.371259	0	0	0.337588	0	0	0	0	0	0	0	0
'HLF'	0	0	0	0	0	0	0	0	0.351945	0.615248	0	0	0.33686	0	0	0	0	0	0	0	0
'APC'	0	0	0	0	0	0	0	0	0	0	0	0	0.332121	0	0	0	0	0	0	0	0
'CEP250'	0	0	0	0	0	0	0	0	0	0	0	0	0.329888	0	0	0	0	0	0	0	0
'NHS'	0	0	0	0	0	0	0	0	0	0	0.321417	0	0.327468	0	0	0	0	0	0	0	0
'SERPINF1'	0	2.18889	0	0	0	0	0	0	0.984963	0.540505	0	0	0.322786	0	0	0	0	0	0	0	0
'ISM1'	0	0.263485	0	0	0	0	0	0	0.585744	0	0	0	0.321251	0	0	0	0	0	0	0	0
'FBXL7'	0	0	0	0	0	0	0	0	0	0	0.568968	0.671124	0.318398	0	0	0	0	0	0	0	0
'PSD3'	0	0	0	0	0	0	0	0	0.417027	0	0.498119	0	0.316294	0	0	0	0	0	0	0	0
'COL8A1'	0	0	0	0	0	0	0	0	0	0	0	0	0.316238	0	0	0	0	0	0	0	0
'FKBP11'	0	0.761694	0	0	0.387477	0	0	0	0.404921	0	0	0	0.310408	0	0	0	0	0	0	0	0
'COL6A6'	0	0.948114	0	0	0	0	0	0	0	0.399059	0	0	0.309736	0	0	0	0	0	0	0	0
'SGCD'	0	0	0	0	0	0	0	0	0.345249	0.290692	0.623165	0.380426	0.308447	0	0	0	0	0	0	0	0
'FBN1'	0	1.00029	0	0	0	0	0	0	0.468665	0.54582	0.306829	0	0.306606	0	0	0	0	0	0	0	0
'TIAM2'	0	0	0	0	0	0	0	0	0.4202	0	0	0	0.304327	0	0	0	0	0	0	0	0
'FAM114A1'	0	0.945405	0	0	0	0	0	0	0.616215	0.313433	0	0	0.299062	0	0	0	0	0	0	0	0
'LOC100516390'	0	0	0	0	0	0	0	0	0.282046	0.26596	0	0	0.291888	0	0	0	0	0	0	0	0
'SCARA5'	0	1.80292	0	0	0	0	0	0	0.968514	0.878308	0	0	0.290972	0	0	0	0	0	0	0	0
'RNF24'	0	0	0	0	0	0	0	0	0	0	0.40568	0	0.289331	0	0	0	0	0	0	0	0
'SCUBE3'	0	0	0	0	0	0	0	0	0	0	0	0	0.288983	0	0	0	0	0	0	0	0
'GJA1'	0	0.59971	0	0.7544	0	0	0	0.444056	0.281474	0	0	0	0.285435	0	0	0	0	0	0	0	0
'GXYLT2'	0	0.440783	0	0	0	0	0	0	0.339427	0.526112	0	0	0.282278	0	0	0	0	0	0	0	0
'MCC'	0	0	0	0.521895	0	0	0	0	0	0.258624	1.22751	0	0.281385	0	0	0	0	0	0	0	0
'TENM3'	0	0	0	0	0	0	0	0	0	0	0.947632	0	0.280582	0	0	0	0	0	0	0	0
'HHIP'	0	0	0	0	0	0	0	0	0	0	0	0	0.278907	0	0	0	0	0	0	0	0
'FKBP7'	0	1.08279	0	0	0	0	0	0	0.499101	0	0	0	0.278507	0	0	0	0	0	0	0	0
'RCN3'	0	1.31312	0	0	0	0	0	0	0.54583	0	0	0	0.277782	0	0	0	0	0	0	0	0
'DYNC2H1'	0	0	0	0	0	0	0	0	0	0	0	0	0.271689	0	0	0	0	0	0	0	0
'IFT81'	0	0	0	0	0	0	0	0	0	0	0	0	0.266388	0	0	0	0	0	0	0	0
'CLMP'	0	1.42708	0	0	0	0	0	0	0.445345	0.788687	0	0	0.265319	0	0	0	0	0	0	0	0
'PTGIS'	0	0.40042	0	0	0	0	0	0	0	0.486361	0	0	0.263972	0	0	0	0	0	0	0	0
'MAGI2'	0	0	0	0	0	0	0	0	0.367156	0.28387	0.608723	0.261022	0.256033	0	0	0	0	0	0	0	0
'RSPO3'	0	0	0	0	0	0	0	0	0.298181	0	0	0	0.252933	0	0	0	0	0	0	0	0
'GCC2'	0	0.279944	0	0	0	0	0	0	0	0	0	0	0.250196	0	0	0	0	0	0	0	0
'MYOC'	0	0	0	0	0	0	0	0	0	2.31621	0	0	0	0	0	0	0	0	0	0	0
'FMO2'	0	0	0	0	0	0	0	0	0.331379	2.1889	0	0	0	0	0	0	0	0	0	0	0
'EFEMP1'	0	0	0.327982	0	0	0	0	0	0	1.67162	0	0	0	0	0	0	0	0	0	0	0
'CFH'	0	0	0	0	0	0	0	0	0.525594	1.63282	0	0	0	0	0	0	0	0	0	0	0
'COL6A5'	0	0.742539	0	0	0	0	0	0	0.63818	1.60296	0	0	0	0	0	0	0	0	0	0	0
'CXCL12'	0	0	0.4277	0.334541	0	0.254093	0	0.920313	0	1.17864	0	0	0	0	0	0	0	0	0	0	0
'AGT'	0	0	0	0	0	0	0	0	0.410813	1.06265	0	0	0	0	0	0	0	0	0	0	0
'ABI3BP'	0	1.12866	0	0	0	0	0	0	0.606051	1.03373	0	0.286707	0	0	0	0	0	0	0	0	0
'LEPR'	0	0.367625	0	0	0	0	0	0	0	0.969331	0	0	0	0	0	0	0	0	0	0	0
'TMEM100'	0	0	0	0	0	0	0	0.842959	0	0.9197	0	0	0	0	0	0	0	0	0	0	0
'MAP1B'	0	0	0.570463	0	0	0	0	0	0	0.900804	0	0	0	0.668385	0	0	0	0	0	0	0
'FAM111A'	0	0	0	0.300786	0.610504	0	0	0.566215	0	0.7882	0	0	0	0	0	0	0	0	0	0	0
'DDR2'	0	0	0.433377	0	0	0.289532	0.55285	0	0	0.77361	0	0	0	0	0	0	0	0	0	0	0
'CHRDL1'	0	1.68985	0	0	0	0	0	0	0	0.737584	0	0	0	0	0	0	0	0	0	0	0
'GREM1'	0	0	0	0	0	0	0	0	0.994906	0.647195	0	0	0	0	0	0	0	0	0	0	0
'TFPI2'	0	0.636961	0	0	0	1.19908	0	0	0.261326	0.647083	0	0	0	0	0	0	0	0	0	0	0
'PCDH11X'	0	0	0	0	0	0	0.282448	0	0	0.586086	0.374171	0	0	0	0	0	0	0	0	0	0
'CCDC80'	0	2.71158	0	0	0	0	0	0	0.798594	0.571676	0	0	0	0	0	0	0	0	0	0	0
'GHR'	0	0	0	0	0	0	0	0	0	0.57036	0.271048	0	0	0	0	0	0	0	0	0	0
FGF7'	0	0	0.737503	0	0	0.291086	0	0	0	0.537793	0	0	0	0.388014	0	0	0	0	0	0	0
'REV3L'	0	0	0	0	0	0	0	0	0	0.536727	0.42618	0.261461	0	0	0	0	0	0	0	0	0
'SVIL'	0	0.288819	0	0.260622	0	0	0	0	0	0.499015	0.901201	0.561777	0	0	0	0	0	0	0	0	0
'ZNF385D'	0	0.599566	0	0	0	0	0	0	0.428972	0.497028	0.38552	0	0	0	0	0	0	0	0	0	0
'LRRC17'	0	1.37102	0	0	0	0	0	0	0	0.487307	0	0	0	0	0	0	0	0	0	0	0
CCL19'	0	0	0.907896	0	0	0.558153	0	0	0	0.455024	0	0	0	0	0	0	0	0	0	0	0
'FMO1'	0	0.293076	0	0.600796	0.651258	0	0	0	0	0.44039	0	0	0	0	0	0	0	0	0	0	0
'PNPO'	0	0.434788	0	0	0	0	0	0	0	0.43571	0	0	0	0	0	0	0	0	0	0	0
'P4HA2'	0	1.47967	0	0	0	0	0	0	0.69543	0.406238	0	0	0	0	0	0	0	0	0	0	0
'CLEC3B'	0	2.04557	0	0	0.265299	0	0	0	0.554733	0.4058	0	0	0	0	0	0	0	0	0	0	0
'PDGFRL'	0	2.18146	0	0	0	0	0	0	0.622451	0.404191	0	0	0	0	0	0	0	0	0	0	0
'LGR5'	0	0.268575	0	0	0	0	0	0	0	0.392846	0	0	0	0	0	0	0	0	0	0	0
'VIT'	0	0	0	0	0	0	0	0	0	0.390779	0	0	0	0	0	0	0	0	0	0	0
'FGFR2'	0	0	0	0	0	0	0	0	0.36021	0.374491	0	0	0	0	0	0	0	0	0	0	0
'FAM198B'	0	0	0	0	0	0	0	0	0	0.373726	0	0	0	0	0	0	0	0	0	0	0
'ADAMTS17'	0	0	0	0	0	0	0	0	0	0.368269	0	0	0	0	0	0	0	0	0	0	0
'COL3A1'	0	2.83519	0	0	0	0	0	0	1.07439	0.362996	0	0	0	0	0	0	0	0	0	0	0
'ARCN1'	0	0	0	0	0	0	0	0	0.678346	0.35897	0	0	0	0	0	0	0	0	0	0	0
'MMP27'	0	1.54795	0	0	0	0	0	0	0.706291	0.355927	0	0	0	0	0	0	0	0	0	0	0
'AR'	0	0.289884	0	0	0	0	0	0	0	0.35058	0	0	0	0	0	0	0	0	0	0	0
'PTX3'	0	0	0	0	0	0	0	0	0	0.343419	0	1.64021	0	0	0	0	0	0	0	0	0
'PTGFR'	0	1.18049	0	0	0	0	0	0	0	0.326007	0	0	0	0	0	0	0	0	0	0	0
'CYP27A1'	0	1.13903	0	0	0	0	0	0	0.808683	0.325585	0	0	0	0	0	0	0	0	0	0	0
'LOX'	0	1.75548	0	0	0	0	0	0	0.525658	0.317703	0	0	0	0	0	0	0	0	0	0	0
'ACSS3'	0	0	0.340329	0	0	0	0	0	0	0.313159	0	0	0	0.278415	0	0	0	0	0	0	0
'NUDT3'	0	0	0	0	0	0	0	0	0	0.310068	0	0	0	0	0	0	0	0	0	0	0
'TNFAIP6'	0	1.3468	0	0	0	0	0	0	0.477716	0.300335	0	0	0	0	0	0	0	0	0	0	0
'FAM185A'	0	0	0	0	0	0	0	0	0	0.295618	0	0	0	0	0	0	0	0	0	0	0
'NTN4'	0	0	0	0	0	0	0	0	0	0.292582	0	0	0	0	0	0	0	0	0	0	0
'TNFSF10'	0	0	0	0.575912	1.07352	0	0	1.08779	0	0.287489	0	0.920266	0	0	0	0	0	0	0	0	0
'DIO2'	0	0	0	0	0	0	0	0	0	0.284436	0	0	0	0	0	0	0	0	0	0	0
'PLCD3'	0	0.631015	0	0	0	0	0	0	0.869349	0.284205	0	0.577154	0	0	0	0	0	0	0	0	0
'ZNF638'	0	0	0	0	0	0	0	0	0	0.276487	0	0	0	0	0	0	0	0	0	0	0
'FGF10'	0	0	0	0	0	0	0	0	0	0.275481	0	0	0	0	0	0	0	0	0	0	0
'RETSAT'	0	0	0	0	0	0	0	0	0	0.272286	0	0	0	0	0	0	0	0	0	0	0
'TMEFF2'	0	0	0	0	0	0	0	0	0	0.265132	0.28886	0	0	0	0	0	0	0	0	0	0
'NTM'	0	0	0	0	0	0	0	0	0	0.260049	0.550668	0	0	0	0	0	0	0	0	0	0
'ACKR2'	0	0.310728	0	0	0	0	0	0	0	0.258682	0	1.01817	0	0	0	0	0	0	0	0	0
'GRID2'	0	0	0	0	0	0	0	0	0	0.253217	0	0	0	0	0	0	0	0	0	0	0
'GAREM1'	0	0	0	0	0	0	0	0	0	0.251433	0.351891	0	0	0	0	0	0	0	0	0	0
'WIF1'	0	0.630274	0	0	0	0	0	0	2.36781	0	0	0	0	0	0	0	0	0	0	0	0
'ACKR4'	0	1.39566	0	0	0	0	0	0	1.28118	0	0	0	0	0	0	0	0	0	0	0	0
'SPARC'	0	2.15253	0	0	0	0	0	0	0.990524	0	0	0	0	0	0	0	0	0	0	0	0
'COL1A2'	0	3.05392	0	0	0	0	0	0	0.966732	0	0	0	0	0	0	0	0	0	0	0	0
'OMD'	0	2.52605	0	0	0	0	0	0	0.919107	0	0	0	0	0	0	0	0	0	0	0	0
'ITGBL1'	0	2.56753	0	0	0	0	0	0	0.90744	0	0	0	0	0	0	0	0	0	0	0	0
'RECK'	0	0	0	0	0	0	0	0	0.779201	0	0	0	0	0	0	0	0	0	0	0	0
'C1QTNF3'	0	0	0	0	0	0	0	0	0.717172	0	0	0	0	0	0	0	0	0	0	0	0
'CPZ'	0	2.18023	0	0	0	0	0	0	0.684663	0	0	0	0	0	0	0	0	0	0	0	0
'KERA'	0	2.08505	0	0	0	0	0	0	0.662806	0	0	0	0	0	0	0	0	0	0	0	0
'CGREF1'	0	0.786692	0	0	0	0	0	0	0.601814	0	0	0	0	0	0	0	0	0	0	0	0
'LOXL4'	0	0.589018	0	0	0	0	0	0	0.526088	0	0	0	0	0	0	0	0	0	0	0	0
'ZNF608'	0	0	0	0	0	0	0	0	0.525565	0	0	0	0	0	0	0	0	0	0	0	0
'COPZ2'	0	1.26913	0	0	0	0	0	0	0.487244	0	0	0	0	0.255021	0	0	0	0	0	0	0
'PI15'	0	0.597656	0	0	0	0	0	0	0.482367	0	0	0	0	0	0	0	0	0	0	0	0
'GADD45G'	0	0.690422	0	0	0	0	0	0	0.460669	0	0	0	0	0.464559	0	0	0	0	0	0	0
'THBS1'	0	0	0	0.576415	0	0	0	1.04259	0.417474	0	0	0	0	0	0	0	0	0	0	0	0
'C3H16orf62'	0	0	0	0	0	0	0	0	0.414357	0	0	0	0	0	0	0	0	0	0	0	0
'ECM2'	0	0.980676	0.372422	0	0	0	0	0	0.40997	0	0	0	0	0	0	0	0	0	0	0	0
'ASTN1'	0	0	0	0	0	0	0	0	0.393125	0	0.284462	0	0	0	0	0	0	0	0	0	0
'SSTR3'	0	0	0	0	0	0	0	0	0.331871	0	0	0	0	0	0	0	0	0	0	0	0
'PLCB4'	0	0	0	0	0	0	0	0.424016	0.331783	0	0.702783	0.780633	0	0	0	0	0	0	0	0	0
'C7H14orf132'	0	0.62423	0	0	0	0	0	0	0.316585	0	0	0	0	0	0	0	0	0	0	0	0
'ENOX1'	0	0	0	0	0	0	0	0	0.307298	0	0.491483	0	0	0	0	0	0	0	0	0	0
'SCN9A'	0	0	0	0	0	0	0	0	0.286019	0	0	0	0	0	0	0	0	0	0	0	0
'SYNJ2'	0	0	0	0	0	0	0	0	0.277853	0	0	0	0	0	0	0	0	0	0	0	0
'LOC100736825'	0	0	0	0	0	0	0	0	0.276748	0	0	0	0	0	0	0	0	0	0	0	0
'FHL1'	0	0.719416	0.499804	0	0	0	0	0	0.276586	0	0	0	0	1.09516	0	0	0	0	0	0	0
'PPP2R2B'	0	0	0	0	0	0	0	0	0.276041	0	0	0	0	0	0	0	0	0	0	0	0
'ADM'	0	0.303562	0	0	0	0	0	0	0.270661	0	0	0	0	0	0	0	0	0	0	0	0
'MICAL2'	0	0	0	0	0	0	0	0	0.26183	0	0.273271	0	0	0	0	0	0	0	0	0	0
'MAOB'	0	0	0	0	0	0	0	0	0.255892	0	0	0	0	0	0	0	0	0	0	0	0
'ZFP92'	0	0	0	0	0	0	0	0	0.253326	0	0	0	0	0	0	0	0	0	0	0	0
'CILP'	0	1.95076	0	0	0	0	0	0	0	0	0	0	0	0	0	0	0	0	0	0	0
'ANGPTL1'	0	1.49971	0	0	0	0	0	0	0	0	0	0	0	0	0	0	0	0	0	0	0
'CHPF'	0	1.25236	0	0	0	0	0	0	0	0	0	0	0	0	0	0	0	0	0	0	0
'FAM198A'	0	1.03032	0	0	0	0	0	0	0	0	0	0	0	0	0	0	0	0	0	0	0
'ADGRD1'	0	1.00727	0	0	0	0	0	0	0	0	0	0	0	0	0	0	0	0	0	0	0
'PEBP4'	0	0.926674	0	0	0	0	0	0	0	0	0	0	0	0	0	0	0	0	0	0	0
'CYP7A1'	0	0.915297	0	0	0	0	0	0	0	0	0	0	0	0	0	0	0	0	0	0	0
'SUPT7L'	0	0.617736	0	0	0	0	0	0	0	0	0	0	0	0	0	0	0	0	0	0	0
'AOX2'	0	0.611934	0	0	0	0	0	0	0	0	0	0	0	0	0	0	0	0	0	0	0
'SEMA3E'	0	0.55941	0	0	0	0	0	0	0	0	0	0	0	0	0	0	0	0	0	0	0
'GALNT5'	0	0.516811	0	0	0	0	0	0	0	0	0	0	0	0	0	0	0	0	0	0	0
'HTRA4'	0	0.493986	0	0	0	0	0	0	0	0	0	0	0	0	0	0	0	0	0	0	0
'CHAC1'	0	0.478361	0	0	0	0	0	0	0	0	0	0	0	0	0	0	0	0	0	0	0
'SEMA3D'	0	0.405403	0	0	0	0	0	0	0	0	0	0.976554	0	0	0	0	0	0	0	0	0
'ADAMTSL1'	0	0.369447	0	0	0	0	0	0	0	0	0.587616	0	0	0	0	0	0	0	0	0	0
'EEF2K'	0	0.325221	0	0	0.251222	0	0	0	0	0	0	0.86266	0	0	0	0	0	0	0	0	0
'SNX22'	0	0.290899	0	0	0	0	0	0	0	0	0	0	0	0	0	0	0	0	0	0	0
'BCHE'	0	0.283591	0	0	0	0	0	0	0	0	0	0	0	0	0	0	0	0	0	0	0
'NIPAL2'	0	0.267233	0	0	0	0	0	0	0	0	0	0	0	0	0	0	0	0	0	0	0
'CCDC93'	0	0.267002	0	0	0	0	0	0	0	0	0	0	0	0	0	0	0	0	0	0	0
'MMRN1'	0	0	0	0	0	0	0	0	0	0	0	2.91824	0	0	0	0	0	0	0	0	0
'CAVIN2'	0	0	0	0.712216	0	0	0	1.03799	0	0	0	2.45607	0	0	0	0	0	0	0	0	0
'TBX1'	0	0	0	0	0	0	0	0	0	0	0	1.99105	0	0	0	0	0	0	0	0	0
'VAT1L'	0	0	0	0	0	0	0	0	0	0	0	1.95145	0	0	0	0	0	0	0	0	0
'F8'	0	0	0	0.272241	0.430475	0	0	0	0	0	0	1.6615	0	0	0	0	0	0	0	0	0
'PROX1'	0	0	0	0	0	0	0	0	0	0	0	1.62519	0	0	0	0	0	0	0	0	0
'RCAN1'	0	0	0	0.838284	0	0.289615	0	0.76528	0	0	0	1.57565	0	0	0	0	0	0	0	0	0
'PARD6G'	0	0	0	0	0	0	0	0	0	0	0	1.57008	0	0	0	0	0	0	0	0	0
'LYVE1'	0	0	0	0	0	0	0	0	0	0	0	1.55934	0	0	0	0	0	0	0	0	0
'FLT4'	0	0	0	0	0	0	0	0	0	0	0	1.48245	0	0	0	0	0	0	0	0	0
'FAM174B'	0	0	0	0	0	0	0	0	0	0	0	1.44145	0	0	0	0	0	0	0	0	0
'SCN3B'	0	0	0	0	0	0	0	0	0	0	0	1.36172	0	0	0	0	0	0	0	0	0
'CNKSR3'	0	0	0	0.370234	0.317732	0	0	0	0	0	0.895117	1.34402	0	0	0	0	0	0	0	0	0
'RASSF9'	0	0	0	0	0.396191	0	0	0.272084	0	0	0	1.33871	0	0	0	0	0	0	0	0	0
'SMAD1'	0	0	0	0.759521	0.552379	0	0	0.474559	0	0	0.70409	1.27879	0	0	0	0	0	0	0	0	0
'GPM6A'	0	0	0	0	0	0	0	0	0	0	0.32429	1.27337	0	0	0	0	0	0	0	0	0
'VWF'	0	0	0	0.994375	1.43234	0	0	0.802909	0	0	0.944658	1.23333	0	0	0	0	0	0	0	0	0
'ECSCR'	0	0	0	0.672198	0.900789	0	0	0.764808	0	0	0	1.21122	0	0	0	0	0	0	0	0	0
'BST1'	0	0	0	0	0	0	0	0.816355	0	0	0	1.15076	0	0	0	0	0	0	0	0	0
'PECAM1'	0	0	0	1.33606	1.81603	0	0	1.01011	0	0	0.636907	1.14465	0	0	0	0	0	0	0	0	0
'DLGAP1'	0	0	0	0	0	0	0	0	0	0	0.567087	1.13472	0	0	0	0	0	0	0	0	0
'CHP2'	0	0	0	0.708667	0.790426	0	0	1.31256	0	0	0	1.10271	0	0	0	0	0	0	0	0	0
'RNF212B'	0	0	0	0	0	0	0	0	0	0	0	1.09106	0	0	0	0	0	0	0	0	0
'AKAP12'	0	0	0.592968	0	0	0.334129	0.290709	0	0	0	0	1.06958	0	0	0	0	0	0	0	0	0
'MAGI1'	0	0	0	0.517071	0.352655	0	0	0.54464	0	0	1.58818	1.04949	0	0	0	0	0	0	0	0	0
'PKHD1L1'	0	0	0	0	0	0	0	0	0	0	0	1.02211	0	0	0	0	0	0	0	0	0
'LMO2'	0	0	0	0.457955	0.275563	0	0	1.14819	0	0	0	1.01974	0	0	0	0	0	0	0	0	0
'GNG11'	0	0	0	1.15781	0.67844	0	0	0.885321	0	0	0	1.00481	0	0	0	0	0	0	0	0	0
'TSHZ2'	0	0	0	0	0	0	0	0	0	0	0	0.999826	0	0	0	0	0	0	0	0	0
'SCN3A'	0	0	0	0	0	0	0	0	0	0	0	0.981351	0	0	0	0	0	0	0	0	0
'USP31'	0	0	0	0	0	0	0	0	0	0	0	0.967062	0	0	0	0	0	0	0	0	0
'MGAT5'	0	0	0	0.344985	0.293237	0	0	0.407506	0	0	1.07862	0.901694	0	0	0	0	0	0	0	0	0
'PDLIM3'	0	0	0	0	0	0	0	0	0	0	0	0.887328	0	0.842382	0	0	0	0	0	0	0
'GALNT10'	0	0	0	0	0	0	0	0	0	0	0.416163	0.880465	0	0	0	0	0	0	0	0	0
'NRP2'	0	0	0	0	0	0	0	0	0	0	0.358518	0.777713	0	0	0	0	0	0	0	0	0
'STON2'	0	0	0	0	0	0	0	0	0	0	0	0.761662	0	0	0	0	0	0	0	0	0
'RFX2'	0	0	0	0	0	0	0	0	0	0	0.85386	0.756206	0	0	0	0	0	0	0	0	0
'TMTC1'	0	0	0	0	0	0	0	0.251713	0	0	0.272288	0.755656	0	0	0	0	0	0	0	0	0
'KDR'	0	0	0	0.876743	0.517194	0	0	0	0	0	0.291381	0.744467	0	0	0	0	0	0	0	0	0
'S1PR1'	0	0	0	1.09065	0.945653	0	0	1.17776	0	0	0	0.723679	0	0	0	0	0	0	0	0	0
'SYNPR'	0	0	0	0	0	0	0	0	0	0	0.309723	0.719469	0	0	0	0	0	0	0	0	0
'KLHL4'	0	0	0	0	0	0	0	0	0	0	0	0.683757	0	0	0	0	0	0	0	0	0
'EFCC1'	0	0	0	0	0	0	0	0	0	0	0	0.664616	0	0	0	0	0	0	0	0	0
'ZFPM2'	0	0	0	0	0	0	0	0	0	0	0.562393	0.663054	0	0	0	0	0	0	0	0	0
'EMCN'	0	0	0	0.927866	0.955407	0	0	0.828581	0	0	0.340631	0.655653	0	0	0	0	0	0	0	0	0
'RTN1'	0	0	0	0	0	0	0	0	0	0	0	0.651779	0	0	0	0	0	0	0	0	0
'PODXL'	0	0	0	0.880825	0.30587	0	0	1.14072	0	0	0	0.624725	0	0	0	0	0	0	0	0	0
'CALCRL'	0	0	0	0.632641	0.661544	0	0	0.519991	0	0	0.820182	0.599225	0	0	0	0	0	0	0	0	0
'EIF2B5'	0	0	0	0	0	0	0	0	0	0	0	0.588025	0	0	0	0	0	0	0	0	0
'CCL24'	0	0	0	0.540804	1.49815	0	0	0	0	0	0	0.570973	0	0	0	0	0	0	0	0	0
'PIEZO2'	0	0	0	0	0	0	0	0	0	0	0	0.543962	0	0	0	0	0	0	0	0	0
'ERG'	0	0	0	1.22917	1.18702	0	0	1.08528	0	0	0.861636	0.529562	0	0	0	0	0	0	0	0	0
'BCR'	0	0	0	1.02003	0	0	0	1.20583	0	0	0.341352	0.518567	0	0	0	0	0	0	0	0	0
'BBX'	0	0	0	0	0	0	0	0	0	0	0.268605	0.514677	0	0	0	0	0	0	0	0	0
'HOMER1'	0	0	0	0	0	0	0	0.266615	0	0	0.814902	0.511833	0	0	0	0	0	0	0	0	0
'SCIN'	0	0	0	0	0	0	0	2.24766	0	0	0	0.499151	0	0	0	0	0	0	0	0	0
'PTPRM'	0	0	0	0.491812	0.710704	0	0	0.456433	0	0	1.77712	0.498192	0	0	0	0	0	0	0	0	0
'PHACTR2'	0	0	0	0.288513	0	0	0	0.499268	0	0	0.521675	0.49004	0	0	0	0	0	0	0	0	0
'LOC100626318'	0	0	0	0.397395	0.745127	0	0	0.468241	0	0	0.344209	0.477895	0	0	0	0	0	0	0	0	0
'MYO1D'	0	0	0	0	0	0	0	0	0	0	0	0.473001	0	0	0	0	0	0	0	0	0
'FLI1'	0	0	0	0.579792	1.01539	0	0	0.453488	0	0	1.05702	0.454301	0	0	0	0	0	0	0	0	0
'NRG1'	0	0	0	0	0	0	0	0	0	0	0.718044	0.452775	0	0	0	0	0	0	0	0	0
'MEIS2'	0	0	0	0	0	0	0	0	0	0	0	0.4497	0	0	0	0	0	0	0	0	0
'ID1'	0	0	0	0.768834	0.541372	0	0	0.618633	0	0	0	0.437664	0	0	0	0	0	0	0	0	0
'MALT1'	0	0	0	0	0.265213	0	0	0	0	0	0	0.407678	0	0	0	0	0	0	0	0	0
'GATA2'	0	0	0	0.69667	0.384433	0	0	0.584058	0	0	0	0.399785	0	0	0	0	0	0	0	0	0
'PRKCH'	0	0	0	0.614954	0.925745	0	0	0.342793	0	0	1.57091	0.398386	0	0	0	0	0	0	0	0	0
'THSD4'	0	0	0.450478	0	0	0	0	0	0	0	0.396726	0.397708	0	0	0	0	0	0	0	0	0
'ARID4A'	0	0	0	0	0	0	0	0	0	0	0	0.394746	0	0	0	0	0	0	0	0	0
'ARHGAP31'	0	0	0	0.646071	0.774129	0	0	0.342728	0	0	0	0.391156	0	0	0	0	0	0	0	0	0
'RAPGEF4'	0	0	0	0.486396	0	0	0	0	0	0	1.00921	0.379367	0	0	0	0	0	0	0	0	0
'MTMR12'	0	0	0	0	0	0	0	0	0	0	0	0.370756	0	0	0	0	0	0	0	0	0
'LOC106510546'	0	0	0	0	0.400877	0	0	0	0	0	0	0.367952	0	0	0	0	0	0	0	0	0
'RAPGEF5'	0	0	0	0.382403	0.546815	0	0	0.269292	0	0	0.67363	0.367427	0	0	0	0	0	0	0	0	0
'PLK2'	0	0	0	1.04055	0.823136	0	0	0.981861	0	0	0.686967	0.364549	0	0	0	0	0	0	0	0	0
'MDGA2'	0	0	0	0	0	0	0	0	0	0	0.632934	0.361593	0	0	0	0	0	0	0	0	0
'KBTBD11'	0	0	0	0	0	0	0	0	0	0	0	0.357841	0	0	0	0	0	0	0	0	0
'SERPINE1'	0	0	0.251484	0	0	0.697153	0	0	0	0	0	0.356657	0	0	0	0	0	0	0	0	0
'IGF2BP2'	0	0	0	0.263695	0	0	0	0.299577	0	0	0.590086	0.339977	0	0	0	0	0	0	0	0	0
'RASSF10'	0	0	0	0	0	0	0	0	0	0	0	0.337271	0	0	0	0	0	0	0	0	0
'DHX34'	0	0	0	0	0	0	0	0	0	0	0.262619	0.333478	0	0	0	0	0	0	0	0	0
'ADAMTS3'	0	0	0	0	0	0	0	0	0	0	0	0.332652	0	0	0	0	0	0	0	0	0
'FAR2'	0	0	0	0	0	0	0	0	0	0	0.288099	0.305026	0	0	0	0	0	0	0	0	0
'FLNB'	0	0	0	0.823345	0.449571	0	0	1.23654	0	0	0.955497	0.302124	0	0	0	0	0	0	0	0	0
'PTPRT'	0	0	0	0	0	0	0	0	0	0	0.728693	0.29955	0	0	0	0	0	0	0	0	0
'TANGO6'	0	0	0	0	1.16833	0	0	0	0	0	0.787017	0.299484	0	0	0	0	0	0	0	0	0
'OSBPL6'	0	0	0	0	0	0	0	0	0	0	0	0.298691	0	0	0	0	0	0	0	0	0
'SLK'	0	0	0	0	0	0	0	0	0	0	0	0.297526	0	0	0	0	0	0	0	0	0
'JCAD'	0	0	0	0.712787	0	0	0	0.949443	0	0	0	0.294317	0	0	0	0	0	0	0	0	0
'GTF2F2'	0	0	0	0	0	0	0	0	0	0	0	0.293466	0	0	0	0	0	0	0	0	0
'PHLDB3'	0	0	0	0	0	0	0	0	0	0	0	0.290066	0	0	0	0	0	0	0	0	0
'NAV2'	0	0	0	0	0	0	0	0	0	0	1.15678	0.286181	0	0	0	0	0	0	0	0	0
'GOLGA7B'	0	0	0	0	0	0	0	0	0	0	0.275075	0.276432	0	0	0	0	0	0	0	0	0
'ZNF462'	0	0	0	0	0.284359	0	0	0	0	0	0.406624	0.275855	0	0	0	0	0	0	0	0	0
'CWC27'	0	0	0	0	0	0	0	0	0	0	0	0.270207	0	0	0	0	0	0	0	0	0
'ITM2A'	0	0	0	0.861919	1.18744	0	0	0.513931	0	0	0	0.267073	0	0	0	0	0	0	0	0	0
'PHF14'	0	0	0	0	0	0	0	0	0	0	0	0.266872	0	0	0	0	0	0	0	0	0
'TTN'	0	0	0	0	0	0	0	0	0	0	0	0.259837	0	0	0	0	0	0	0	0	0
'MYCT1'	0	0	0	0.714621	0.417129	0	0	0.780782	0	0	0	0.255761	0	0	0	0	0	0	0	0	0
'CLEC2B'	0	0	0	0.993778	0.574095	0	0	1.41936	0	0	0.798744	0.25516	0	0	0	0	0	0	0	0	0
'OPHN1'	0	0	0	0	0	0	0	0	0	0	0.781908	0.253986	0	0	0	0	0	0	0	0	0
'PITPNC1'	0	0	0	0.533165	0.849163	0	0	0	0	0	1.76863	0	0	0	0	0	0	0	0	0	0
'MYO1E'	0	0	0	0.478227	0.257669	0	0	0.356734	0	0	1.69557	0	0	0	0	0	0	0	0	0	0
'MECOM'	0	0	0	0.608992	0.463024	0	0	1.22389	0	0	1.63116	0	0	0	0	0	0	0	0	0	0
'ADAMTS9'	0	0	0	0.46645	0.783535	0	0	0	0	0	1.57965	0	0	0	0	0	0	0	0	0	0
'ARL15'	0	0	0	0.250302	0	0	0	0.654061	0	0	1.28511	0	0	0	0	0	0	0	0	0	0
'PLCB1'	0	0	0	0	0.354575	0	0	0.319927	0	0	1.2357	0	0	0.578988	0	0	0	0	0	0	0
'MARCH3'	0	0	0	0.341301	0.26055	0	0	0.310198	0	0	1.20664	0	0	0	0	0	0	0	0	0	0
'LCK'	0	0	0	0.821417	0.360408	0	0	0	0	0	1.18869	0	0	0	0	0	0	0	0	0	0
'SYNE2'	0	0	0	0.577462	0.547016	0	0	1.21836	0	0	1.07983	0	0	0	0	0	0	0	0	0	0
'DACH1'	0	0	0	0.301621	0.291886	0	0	0	0	0	1.07566	0	0	0	0	0	0	0	0	0	0
'LOC100624226'	0	0	0	1.27675	0.915064	0	0	0.961425	0	0	1.03809	0	0	0	0	0	0	0	0	0	0
'PIK3C2A'	0	0	0	0.770442	0.60103	0	0	0.707162	0	0	1.02791	0	0	0	0	0	0	0	0	0	0
'MAST4'	0	0	0	0.375835	0	0	0	0.922701	0	0	1.0086	0	0	0	0	0	0	0	0	0	0
'CNTNAP2'	0	0	0	0	0	0	0	0	0	0	0.993547	0	0	0	0	0	0	0	0	0	0
'TENM2'	0	0	0	0	0	0	0	0	0	0	0.958929	0	0	0	0	0	0	0	0	0	0
'FLT1'	0	0	0	0.842927	0.868546	0	0	0.59288	0	0	0.942056	0	0	0	0	0	0	0	0	0	0
'CSMD1'	0	0	0	0	0	0	0	0	0	0	0.911494	0	0	0	0	0	0	0	0	0	0
'PTPRB'	0	0	0	0.814378	1.17851	0	0	0.939232	0	0	0.891254	0	0	0	0	0	0	0	0	0	0
'IGF2'	0	0	0	1.26338	1.18767	0	0	1.59314	0	0	0.889816	0	0	0	0	0	0	0	0	0	0
'NRXN3'	0	0	0	0	0	0	0	0	0	0	0.874914	0	0	0	0	0	0	0	0	0	0
'ARHGAP23'	0	0	0	0.280751	0	0	0	0.283754	0	0	0.873714	0	0	0	0	0	0	0	0	0	0
'RALGAPA2'	0	0	0	0.395033	0.251786	0	0	0.349593	0	0	0.864233	0	0	0	0	0	0	0	0	0	0
'OSBPL3'	0	0	0	0	0	0	0	0.560712	0	0	0.861442	0	0	0	0	0	0	0	0	0	0
'PTPRD'	0	0	0	0	0	0	0	0	0	0	0.844658	0	0	0	0	0	0	0	0	0	0
'DNM3'	0	0	0	0	0.405357	0	0	0	0	0	0.827552	0	0	0	0	0	0	0	0	0	0
'PLAT'	0	0	0	0	1.74728	0	0	0.939784	0	0	0.823851	0	0	0	0	0	0	0	0	0	0
'SOX5'	0	0	0.284159	0	0	0	0	0	0	0	0.816301	0	0	0	0	0	0	0	0	0	0
'USP3'	0	0	0	0.255172	0	0	0	0	0	0	0.811732	0	0	0	0	0	0	0	0	0	0
'DLG2'	0	0	0.416669	0	0	0	0	0	0	0	0.804323	0	0	0	0	0	0	0	0	0	0
'LARGE1'	0	0	0	0	0	0	0	0	0	0	0.777802	0	0	0	0	0	0	0	0	0	0
'ERBB4'	0	0	0	0	0	0	0	0	0	0	0.770039	0	0	0	0	0	0	0	0	0	0
'LRRC23'	0	0	0	0	0	0	0	0	0	0	0.762362	0	0	0	0	0	0	0	0	0	0
'PRKG1'	0	0	0.504546	0	0	0.487853	0	0	0	0	0.75825	0	0	0	0	0	0	0	0	0	0
'MYRIP'	0	0	0	0	0.301921	0	0	0.603421	0	0	0.750073	0	0	0	0	0	0	0	0	0	0
'DISC1'	0	0	0	0	0	0	0	0	0	0	0.743631	0	0	0	0	0	0	0	0	0	0
'GALNTL6'	0	0	0	0	0	0	0	0	0	0	0.742352	0	0	0	0	0	0	0	0	0	0
'CTNNA2'	0	0	0	0	0	0	0	0	0	0	0.724224	0	0	0	0	0	0	0	0	0	0
'LMCD1'	0	0	0	0.599418	0.714166	0	0	0.605605	0	0	0.718189	0	0	0	0	0	0	0	0	0	0
'CYYR1'	0	0	0	1.00242	1.65389	0	0	1.01959	0	0	0.707018	0	0	0	0	0	0	0	0	0	0
'STPG4'	0	0	0	0	0	0	0	0	0	0	0.69193	0	0	0	0	0	0	0	0	0	0
'SH3RF2'	0	0	0	0	0.827214	0	0	0	0	0	0.69192	0	0	0	0	0	0	0	0	0	0
'N4BP1'	0	0	0	0.58632	0.715906	0	0	0.458413	0	0	0.6859	0	0	0	0	0	0	0	0	0	0
'ARHGEF9'	0	0	0	0	0	0	0	0	0	0	0.662149	0	0	0	0	0	0	0	0	0	0
'KITLG'	0	0	0	0.548399	0	0	0	0.540224	0	0	0.661725	0	0	0	0	0	0	0	0	0	0
'OPCML'	0	0	0	0	0	0	0	0	0	0	0.658749	0	0	0	0	0	0	0	0	0	0
'CDH18'	0	0	0	0	0	0	0	0	0	0	0.654762	0	0	0	0	0	0	0	0	0	0
'ABLIM3'	0	0	0	0.901067	0	0	0	0.531241	0	0	0.646572	0	0	0	0	0	0	0	0	0	0
'CNTN4'	0	0	0	0	0	0	0	0	0	0	0.642846	0	0	0	0	0	0	0	0	0	0
'ADGRF5'	0	0	0	0.766477	0	0.46995	0	1.29534	0	0	0.638498	0	0	0	0	0	0	0	0	0	0
'PCDH15'	0	0	0	0	0	0	0	0	0	0	0.636265	0	0	0	0	0	0	0	0	0	0
'NRG3'	0	0	0	0	0	0	0	0	0	0	0.627306	0	0	0	0	0	0	0	0	0	0
'SGCZ'	0	0	0	0	0	0	0	0	0	0	0.626979	0	0	0	0	0	0	0	0	0	0
'CLEC1A'	0	0	0	0.632597	0.493422	0	0	0.260255	0	0	0.61502	0	0	0	0	0	0	0	0	0	0
'SHROOM4'	0	0	0	0.731688	0.900832	0	0	0.550453	0	0	0.611319	0	0	0	0	0	0	0	0	0	0
'FABP5'	0	0	0	1.37472	1.30695	0	0	0.305491	0	0	0.598398	0	0	0	0	0	0	0	0	0	0
'ENPP2'	0	0	0	1.10171	0.635495	0	0	0.942442	0	0	0.595749	0	0	0	0	0	0	0	0	0	0
'MCTP2'	0	0	0	0	0	0	0	0	0	0	0.59558	0	0	0	0	0	0	0	0	0	0
'NCKAP5'	0	0	0.43956	0	0	0	0	0	0	0	0.594441	0	0	0	0	0	0	0	0	0	0
'EPHA6'	0	0	0	0	0	0	0	0	0	0	0.592575	0	0	0	0	0	0	0	0	0	0
'SCLT1'	0	0	0	0	0	0	0	0	0	0	0.591232	0	0	0	0	0	0	0	0	0	0
'BBS9'	0	0	0	0	0	0	0	0	0	0	0.588673	0	0	0	0	0	0	0	0	0	0
'GRM7'	0	0	0	0	0	0	0	0	0	0	0.586888	0	0	0	0	0	0	0	0	0	0
'POLG2'	0	0	0	0	0	0	0	0	0	0	0.577186	0	0	0	0	0	0	0	0	0	0
'GALNT13'	0	0	0	0	0	0	0	0	0	0	0.567313	0	0	0	0	0	0	0	0	0	0
'MGAT4C'	0	0	0	0	0	0	0	0	0	0	0.544366	0	0	0	0	0	0	0	0	0	0
'CACNB2'	0	0	0	0	0	0	0	0	0	0	0.540859	0	0	0	0	0	0	0	0	0	0
'TRPM3'	0	0	0	0	0	0	0	0	0	0	0.540321	0	0	0	0	0	0	0	0	0	0
'MEOX1'	0	0	0	0	1.45654	0	0	0	0	0	0.540315	0	0	0	0	0	0	0	0	0	0
'GRM8'	0	0	0	0	0	0	0	0	0	0	0.535464	0	0	0	0	0	0	0	0	0	0
'NR5A2'	0	0	0	0.534809	0.250094	0	0	0	0	0	0.531222	0	0	0	0	0	0	0	0	0	0
'RAPGEF1'	0	0	0	0.441269	0	0	0	0.77331	0	0	0.529694	0	0	0	0	0	0	0	0	0	0
'ADORA2A'	0	0	0	0.577375	0.287819	0	0	1.50137	0	0	0.52689	0	0	0	0	0	0	0	0	0	0
'PLCL1'	0	0	0	0	0	0.360428	0	0	0	0	0.524929	0	0	0	0	0	0	0	0	0	0
'EFNB2'	0	0	0	0	0	0	0	0.292575	0	0	0.516329	0	0	0	0	0	0	0	0	0	0
'LSAMP'	0	0	0	0	0	0	0	0	0	0	0.513086	0	0	0	0	0	0	0	0	0	0
'MAGI3'	0	0	0	0	0	0	0	0	0	0	0.512541	0	0	0	0	0	0	0	0	0	0
'KHDRBS2'	0	0	0	0	0	0	0	0	0	0	0.509614	0	0	0	0	0	0	0	0	0	0
'BAZ2B'	0	0	0	0.322857	0	0	0	0.35302	0	0	0.503123	0	0	0	0	0	0	0	0	0	0
'ZC3H12B'	0	0	0	0	0	0	0	0	0	0	0.501098	0	0	0	0	0	0	0	0	0	0
'CHRM3'	0	0	0	0	0	0	0	0	0	0	0.500243	0	0	0	0	0	0	0	0	0	0
'DPP10'	0	0	0	0	0	0	0	0	0	0	0.499099	0	0	0	0	0	0	0	0	0	0
'ADGRF2'	0	0	0	1.5608	0.413516	0	0	1.28632	0	0	0.497605	0	0	0	0	0	0	0	0	0	0
'ASTN2'	0	0	0	0	0	0	0	0	0	0	0.495841	0	0	0	0	0	0	0	0	0	0
'SLCO2A1'	0	0	0	0	0.270878	0	0	0	0	0	0.494074	0	0	0	0	0	0	0	0	0	0
'CMSS1'	0	0	0	0	0	0	0	0	0	0	0.49012	0	0	0	0	0	0	0	0	0	0
'AKAP6'	0	0	0	0	0	0	0	0	0	0	0.487811	0	0	0	0	0	0	0	0	0	0
'MALRD1'	0	0	0	0	0	0	0	0	0	0	0.481504	0	0	0	0	0	0	0	0	0	0
'TRPM6'	0	0	0	0	0	0	0	0.757162	0	0	0.47646	0	0	0	0	0	0	0	0	0	0
'C9H11orf87'	0	0	0	0	0	0	0	0	0	0	0.475324	0	0	0	0	0	0	0	0	0	0
'CLIC5'	0	0	0	1.01539	0.558266	0	0	0.511575	0	0	0.474198	0	0	0	0	0	0	0	0	0	0
'LUZP2'	0	0	0	0	0	0	0	0	0	0	0.473864	0	0	0	0	0	0	0	0	0	0
'B3GALT1'	0	0	0	0	0	0	0	0	0	0	0.469441	0	0	0	0	0	0	0	0	0	0
'ESRRG'	0	0	0	0	0	0	0	0	0	0	0.466681	0	0	0	0	0	0	0	0	0	0
'LOC100511937'	0	0	0	0.275478	0	0	0	0.336755	0	0	0.465876	0	0	0	0	0	0	0	0	0	0
'COL25A1'	0	0	0	0	0	0	0	0	0	0	0.464768	0	0	0	0	0	0	0	0	0	0
'LRRC7'	0	0	0	0	0	0	0	0	0	0	0.460159	0	0	0	0	0	0	0	0	0	0
'ATP8A1'	0	0	0	0	0	0	0	0	0	0	0.458153	0	0	0	0	0	0	0	0	0	0
'TNFSF4'	0	0	0	0	0	0	0	0	0	0	0.457467	0	0	0	0	0	0	0	0	0	0
'KCNH8'	0	0	0	0	0	0	0	0	0	0	0.447571	0	0	0	0	0	0	0	0	0	0
'COLEC10'	0	0	0	0	0	0	0	0	0	0	0.446723	0	0	0	0	0	0	0	0	0	0
'MMRN2'	0	0	0	0.992718	1.52876	0	0	1.40983	0	0	0.442568	0	0	0	0	0	0	0	0	0	0
'FBXW7'	0	0	0	0	0	0	0	0	0	0	0.439309	0	0	0	0	0	0	0	0	0	0
'MYO10'	0	0	0	0.320048	0	0	0	0.948262	0	0	0.438219	0	0	0	0	0	0	0	0	0	0
'DOCK3'	0	0	0	0	0	0	0	0	0	0	0.435864	0	0	0	0	0	0	0	0	0	0
'FAM19A2'	0	0	0	0	0	0	0	0	0	0	0.434231	0	0	0	0	0	0	0	0	0	0
'LOC110257749'	0	0	0	0	0	0	0	0	0	0	0.43122	0	0	0	0	0	0	0	0	0	0
'GABRG3'	0	0	0	0	0	0	0	0	0	0	0.429823	0	0	0	0	0	0	0	0	0	0
'FHOD3'	0	0	0	0	0	0	0	0	0	0	0.426249	0	0	0	0	0	0	0	0	0	0
'KCNN3'	0	0	0	0.3882	0	0	0	0.588391	0	0	0.424417	0	0	0	0	0	0	0	0	0	0
'KLHL1'	0	0	0	0	0	0	0	0	0	0	0.424248	0	0	0	0	0	0	0	0	0	0
'PTPN4'	0	0	0	0	0	0	0	0	0	0	0.418645	0	0	0	0	0	0	0	0	0	0
'UNC5C'	0	0	0	0	0	0	0	0	0	0	0.415725	0	0	0	0	0	0	0	0	0	0
'SUFU'	0	0	0	0	0	0	0	0	0	0	0.41378	0	0	0	0	0	0	0	0	0	0
'RPGR'	0	0	0	0	0	0	0	0	0	0	0.409728	0	0	0	0	0	0	0	0	0	0
'FRY'	0	0	0	0	0	0	0.301089	0	0	0	0.403105	0	0	0	0	0	0	0	0	0	0
'NPSR1'	0	0	0	0	0	0	0	0	0	0	0.401132	0	0	0	0	0	0	0	0	0	0
'SPATA5'	0	0	0	0	0	0	0	0	0	0	0.401081	0	0	0	0	0	0	0	0	0	0
'MAML3'	0	0	0	0	0	0	0	0	0	0	0.400892	0	0	0	0	0	0	0	0	0	0
'PIK3C2B'	0	0	0	0.295138	0	0	0	0.277838	0	0	0.397297	0	0	0	0	0	0	0	0	0	0
'BICD1'	0	0	0	0	0	0	0	0	0	0	0.396441	0	0	0	0	0	0	0	0	0	0
'RIMS1'	0	0	0	0	0	0	0	0	0	0	0.396116	0	0	0	0	0	0	0	0	0	0
'DENND5B'	0	0	0	0	0	0	0	0	0	0	0.395467	0	0	0	0	0	0	0	0	0	0
LHFPL3'	0	0	0.847575	0	0	0	0	0	0	0	0.395259	0	0	0	0	0	0	0	0	0	0
'CHORDC1'	0	0	0	0	0	0	0	0.433042	0	0	0.39491	0	0	0	0	0	0	0	0	0	0
'SPIDR'	0	0	0	0	0	0	0	0	0	0	0.392883	0	0	0	0	0	0	0	0	0	0
'LOC110261352'	0	0	0	0	0	0	0	0	0	0	0.3919	0	0	0	0	0	0	0	0	0	0
'LOC100524794'	0	0	0	0	0	0	0	0	0	0	0.388916	0	0	0	0	0	0	0	0	0	0
'RGS6'	0	0	0	0	0	0	0	0	0	0	0.388894	0	0	0	0	0	0	0	0	0	0
'LOC100523747'	0	0	0	0	0	0	0	0	0	0	0.388563	0	0	0	0	0	0	0	0	0	0
'SAMD5'	0	0	0	0	0	0	0	0	0	0	0.379959	0	0	0	0	0	0	0	0	0	0
'HDAC8'	0	0	0	0	0	0	0	0	0	0	0.379686	0	0	0	0	0	0	0	0	0	0
'RNF216'	0	0	0	0	0	0	0	0	0	0	0.379661	0	0	0	0	0	0	0	0	0	0
'CHODL'	0	0	0	0	0	0	0	0	0	0	0.379619	0	0	0	0	0	0	0	0	0	0
'TOX3'	0	0	0	0	0.322892	0	0	0	0	0	0.378647	0	0	0	0	0	0	0	0	0	0
'PHACTR4'	0	0	0	0	0	0	0	0.512625	0	0	0.377708	0	0	0	0	0	0	0	0	0	0
'IFNAR2'	0	0	0	0.359402	0	0	0	0	0	0	0.375244	0	0	0	0	0	0	0	0	0	0
'KCNB2'	0	0	0	0	0	0	0	0	0	0	0.371557	0	0	0	0	0	0	0	0	0	0
'SCFD2'	0	0	0	0	0	0	0	0	0	0	0.369919	0	0	0	0	0	0	0	0	0	0
'ANO6'	0	0	0	0.298985	0	0	0	1.56333	0	0	0.368594	0	0	0	0	0	0	0	0	0	0
'DTNB'	0	0	0	0	0	0.258352	0	0	0	0	0.366255	0	0	0	0	0	0	0	0	0	0
'LOC102164422'	0	0	0	0	0	0	0	0	0	0	0.365061	0	0	0	0	0	0	0	0	0	0
'PAK5'	0	0	0	0	0	0	0	0	0	0	0.364719	0	0	0	0	0	0	0	0	0	0
'DTNA'	0	0	0	0	0	0	0.386416	0	0	0	0.362871	0	0	0.685752	0	0	0	0	0	0	0
'EPHA4'	0	0	0	0	0	0	0	0.267201	0	0	0.362785	0	0	0	0	0	0	0	0	0	0
'IFIH1'	0	0	0	0.654828	0	0	0	0.797909	0	0	0.361759	0	0	0	0	0	0	0	0	0	0
'FAM219A'	0	0	0	0	0	0	0	0	0	0	0.358348	0	0	0	0	0	0	0	0	0	0
'SULF1'	0	0	0	0	0	0.571609	0	0.535553	0	0	0.355422	0	0	0	0	0	0	0	0	0	0
'C8H4orf17'	0	0	0	0	0	0	0	0	0	0	0.349769	0	0	0	0	0	0	0	0	0	0
'IQCK'	0	0	0	0	0	0	0	0	0	0	0.346985	0	0	0	0	0	0	0	0	0	0
'LOC106509492'	0	0	0	0	0	0	0	0	0	0	0.342058	0	0	0	0	0	0	0	0	0	0
'LNX1'	0	0	0	0	0	0	0	0	0	0	0.341325	0	0	0	0	0	0	0	0	0	0
'ATP10B'	0	0	0	0	0	0	0	0	0	0	0.337072	0	0	0	0	0	0	0	0	0	0
'ROBO4'	0	0	0	1.09232	0.393506	0	0	0.51898	0	0	0.336494	0	0	0	0	0	0	0	0	0	0
'SRGAP1'	0	0	0	0	0	0	0	0	0	0	0.334906	0	0	0	0	0	0	0	0	0	0
'RNLS'	0	0	0	0	0	0	0	0	0	0	0.333988	0	0	0	0	0	0	0	0	0	0
'TTC29'	0	0	0	0	0	0	0	0	0	0	0.332276	0	0	0	0	0	0	0	0	0	0
'LOC100520241'	0	0	0	0	0	0	0	0	0	0	0.32856	0	0	0	0	0	0	0	0	0	0
'SPATA16'	0	0	0	0	0	0	0	0	0	0	0.327289	0	0	0	0	0	0	0	0	0	0
'NLRC5'	0	0	0	0	0	0	0	0	0	0	0.324087	0	0	0	0	0	0	0	0	0	0
'RFX7'	0	0	0	0	0	0	0	0	0	0	0.323202	0	0	0	0	0	0	0	0	0	0
'ARNTL2'	0	0	0	0	0	0	0	0	0	0	0.322517	0	0	0	0	0	0	0	0	0	0
'LPAR6'	0	0	0	0.939068	0.45561	0	0	0.524419	0	0	0.319387	0	0	0	0	0	0	0	0	0	0
'LOC100511545'	0	0	0	0	0	0	0	0	0	0	0.318948	0	0	0	0	0	0	0	0	0	0
'GIPC2'	0	0	0	0	0	0	0	0.334145	0	0	0.317767	0	0	0	0	0	0	0	0	0	0
'LOC100517129'	0	0	0	0.544075	0.348514	0	0	0.425118	0	0	0.317598	0	0	0	0	0	0	0	0	0	0
'TBC1D20'	0	0	0	0.647827	0	0	0	1.38102	0	0	0.316248	0	0	0	0	0	0	0	0	0	0
'KCNT2'	0	0	0	0	0	0	0	0	0	0	0.316013	0	0	0	0	0	0	0	0	0	0
'SLC16A14'	0	0	0	0.77591	0.696704	0	0	0	0	0	0.313901	0	0	0	0	0	0	0	0	0	0
'EYA1'	0	0	0	0	0	0	0	0	0	0	0.313171	0	0	0	0	0	0	0	0	0	0
'BPTF'	0	0	0	0	0	0	0	0	0	0	0.30826	0	0	0	0	0	0	0	0	0	0
'PCDH19'	0	0	0	0	0	0	0	0	0	0	0.306972	0	0	0	0	0	0	0	0	0	0
'JAM2'	0	0	0	0.896845	1.07697	0	0	0.664678	0	0	0.306897	0	0	0	0	0	0	0	0	0	0
'PDE11A'	0	0	0	0	0	0	0	0	0	0	0.306459	0	0	0	0	0	0	0	0	0	0
'STC1'	0	0	0	0	0.376047	0	0	0.501066	0	0	0.305237	0	0	0	0	0	0	0	0	0	0
'MYO3B'	0	0	0	0	0	0	0	0	0	0	0.304531	0	0	0	0	0	0	0	0	0	0
'UBE2D4'	0	0	0	0	0.364228	0	0	0	0	0	0.303472	0	0	0	0	0	0	0	0	0	0
'LOC106510097'	0	0	0	0	0.631897	0	0	0	0	0	0.299677	0	0	0	0	0	0	0	0	0	0
'POLA1'	0	0	0	0	0	0	0	0	0	0	0.299405	0	0	0	0	0	0	0	0	0	0
'DCHS2'	0	0	0	0	0	0	0	0	0	0	0.29848	0	0	0	0	0	0	0	0	0	0
'MEOX2'	0	0	0	0	0.271679	0	0	0	0	0	0.29844	0	0	0	0	0	0	0	0	0	0
'GRM3'	0	0	0	0	0	0	0	0	0	0	0.298369	0	0	0	0	0	0	0	0	0	0
'VWA8'	0	0	0	0	0	0	0	0	0	0	0.297634	0	0	0	0	0	0	0	0	0	0
'AHCYL2'	0	0	0	0	0	0	0	0	0	0	0.293488	0	0	0	0	0	0	0	0	0	0
'PAK3'	0	0	0.41946	0	0	0	0	0	0	0	0.289745	0	0	0	0	0	0	0	0	0	0
'NRCAM'	0	0	0	0	0	0	0	0	0	0	0.289477	0	0	0	0	0	0	0	0	0	0
'HTR2C'	0	0	0	0	0	0	0	0	0	0	0.285163	0	0	0	0	0	0	0	0	0	0
'HCN1'	0	0	0	0	0	0	0	0	0	0	0.283276	0	0	0	0	0	0	0	0	0	0
'LCLAT1'	0	0	0	0	0	0	0	0	0	0	0.282079	0	0	0	0	0	0	0	0	0	0
SCAI'	0	0	0	0	0	0	0	0	0	0	0.278949	0	0	0	0	0	0	0	0	0	0
'PBX3'	0	0	0	0	0	0	0	0	0	0	0.272037	0	0	0	0	0	0	0	0	0	0
'RDH10'	0	0	0	0.366289	0	0	0	0	0	0	0.271206	0	0	0	0	0	0	0	0	0	0
'ENOX2'	0	0	0	0	0	0	0	0	0	0	0.269481	0	0	0	0	0	0	0	0	0	0
'C2CD4B'	0	0	0	1.50929	1.1625	0	0	0.949957	0	0	0.268654	0	0	0	0	0	0	0	0	0	0
'ABTB2'	0	0	0	0	0	0	0	0	0	0	0.268028	0	0	0	0	0	0	0	0	0	0
'TCP11'	0	0	0	0	0	0	0	0	0	0	0.266318	0	0	0	0	0	0	0	0	0	0
'BRWD3'	0	0	0	0	0	0	0	0	0	0	0.266169	0	0	0	0	0	0	0	0	0	0
'NHSL2'	0	0	0	0	0	0	0	0	0	0	0.263359	0	0	0	0	0	0	0	0	0	0
'SIPA1L3'	0	0	0	0	0	0	0	0	0	0	0.263196	0	0	0	0	0	0	0	0	0	0
'TMEM178A'	0	0	0	0	0	0	0	0	0	0	0.262554	0	0	0	0	0	0	0	0	0	0
'PLPPR1'	0	0	0	0	0	0	0	0	0	0	0.259236	0	0	0	0	0	0	0	0	0	0
'FAM35A'	0	0	0	0	0	0	0	0	0	0	0.259085	0	0	0	0	0	0	0	0	0	0
'PCNX2'	0	0	0	0	0	0	0	0	0	0	0.258348	0	0	0	0	0	0	0	0	0	0
'RAI1'	0	0	0	0	0	0	0	0	0	0	0.258043	0	0	0	0	0	0	0	0	0	0
'MYO1B'	0	0	0.359605	0	0	0.895848	0.702662	0	0	0	0.256683	0	0	0	0	0	0	0	0	0	0
'ABCB1'	0	0	0	0.425896	0	0	0	0	0	0	0.256377	0	0	0	0	0	0	0	0	0	0
'CUL2'	0	0	0	0	0	0.260551	0	0	0	0	0.25124	0	0	0	0	0	0	0	0	0	0
'PGAP1'	0	0	0	0	0	0	0	0	0	0	0.250175	0	0	0	0	0	0	0	0	0	0
'ACKR1'	0	0	0	0	3.14413	0	0	0	0	0	0.250007	0	0	0	0	0	0	0	0	0	0
'C14H10orf10'	0	0	0	1.11012	0.827509	0	0	1.64814	0	0	0	0	0	0	0	0	0	0	0	0	0
'IL33'	0	0	0	0.348942	1.16615	0	0	1.57368	0	0	0	0	0	0	0	0	0	0	0	0	0
'UBB'	0	0	0	1.25975	0.489606	0	0	1.40978	0	0	0	0	0	0	0	0	0	0	0	0	0
'TSC22D1'	0	0	0	1.01002	0	0	0	1.39412	0	0	0	0	0	0	0	0	0	0	0	0	0
'DLL4'	0	0	0	0.952487	0	0	0	1.30967	0	0	0	0	0	0	0	0	0	0	0	0	0
'SEMA7A'	0	0	0	1.03378	0	0	0	1.26148	0	0	0	0	0	0	0	0	0	0	0	0	0
'EDN1'	0	0	0	0.45787	0.833742	0	0	1.21728	0	0	0	0	0	0	0	0	0	0	0	0	0
'LOC102161418'	0	0	0	0.846459	1.09482	0	0	1.20934	0	0	0	0	0	0	0	0	0	0	0	0	0
'SOX17'	0	0	0	1.13464	0.502225	0	0	1.18187	0	0	0	0	0	0	0	0	0	0	0	0	0
'NEDD9'	0	0	0	0.949835	0.324467	0	0	1.17027	0	0	0	0	0	0	0	0	0	0	0	0	0
'EGR1'	0	0	0	0.587049	0	0	0	1.16941	0	0	0	0	0	0	0	0	0	0	0	0	0
'USP53'	0	0	0	0	0	0	0.33044	1.05876	0	0	0	0	0	0	0	0	0	0	0	0	0
'HEY1'	0	0	0	0.376519	0	0	0	1.04278	0	0	0	0	0	0	0	0	0	0	0	0	0
'CASP7'	0	0	0	0.533506	0.339515	0	0	1.01308	0	0	0	0	0	0	0	0	0	0	0	0	0
'CLEC14A'	0	0	0	0.901618	1.17078	0	0	0.9739	0	0	0	0	0	0	0	0	0	0	0	0	0
'LPCAT2'	0	0	0	0	0	0	0	0.932525	0	0	0	0	0	0	0	0	0	0	0	0	0
'CX3CL1'	0	0	0	0.340885	0	0	0	0.888871	0	0	0	0	0	0	0	0	0	0	0	0	0
'IFIT1'	0	0	0	0.500328	0	0	0	0.874132	0	0	0	0	0	0	0	0	0	0	0	0	0
'NPR3'	0	0	0	0	0	0	0	0.857334	0	0	0	0	0	0	0	0	0	0	0	0	0
'UBD'	0	0	0	0.676796	0	0	0	0.821843	0	0	0	0	0	0	0	0	0	0	0	0	0
'CD93'	0	0	0	1.08764	1.25595	0	0	0.816458	0	0	0	0	0	0	0	0	0	0	0	0	0
'APOLD1'	0	0	0	0.880585	0	0.462947	0.59693	0.802033	0	0	0	0	0	0	0	0	0	0	0	0	0
'FAM208A'	0	0	0	0.303564	0	0	0	0.794684	0	0	0	0	0	0	0	0	0	0	0	0	0
'HYAL2'	0	0	0	0.580332	1.14934	0	0	0.764059	0	0	0	0	0	0	0	0	0	0	0	0	0
'GJA5'	0	0	0	0	0	0	0	0.741885	0	0	0	0	0	0.653646	0	0	0	0	0	0	0
'ACTR3B'	0	0	0	0	0	0	0	0.724002	0	0	0	0	0	0	0	0	0	0	0	0	0
'CD320'	0	0	0	1.23907	0	0	0	0.624297	0	0	0	0	0	0	0	0	0	0	0	0	0
'RSAD2'	0	0	0	0.484494	0	0	0	0.611705	0	0	0	0	0	0	0	0	0	0	0	0	0
'MALL'	0	0	0	0	0.631727	0	0	0.609147	0	0	0	0	0	0	0	0	0	0	0	0	0
'LOC100519098'	0	0	0	0.665183	0.421615	0	0	0.594443	0	0	0	0	0	0	0	0	0	0	0	0	0
'ADGRL4'	0	0	0	0.62083	0.826875	0	0	0.513986	0	0	0	0	0	0	0	0	0	0	0	0	0
'PUS7'	0	0	0	0	0	0	0	0.511136	0	0	0	0	0	0	0	0	0	0	0	0	0
'EIF2AK2'	0	0	0	0.42529	0	0	0	0.510676	0	0	0	0	0	0	0	0	0	0	0	0	0
'LOC110255360'	0	0	0	0.255785	0	0	0	0.504442	0	0	0	0	0	0	0	0	0	0	0	0	0
'RND1'	0	0	0	1.01528	0.547818	0	0	0.477118	0	0	0	0	0	0	0	0	0	0	0	0	0
'BDKRB2'	0	0	0	0.704765	0.263799	0	0	0.47497	0	0	0	0	0	0	0	0	0	0	0	0	0
'JPH4'	0	0	0	0	0	0	0	0.440005	0	0	0	0	0	0	0	0	0	0	0	0	0
'SEL1L3'	0	0	0	0	0	0	0	0.431286	0	0	0	0	0	0	0	0	0	0	0	0	0
'BMX'	0	0	0	0	0	0	0	0.382893	0	0	0	0	0	0	0	0	0	0	0	0	0
'LCN2'	0	0	0	0.269736	0	0	0	0.369823	0	0	0	0	0	0	0	0	0	0	0	0	0
'TTF1'	0	0	0	0.387188	0	0	0	0.367173	0	0	0	0	0	0	0	0	0	0	0	0	0
'CIR1'	0	0	0	0	0	0	0	0.353434	0	0	0	0	0	0	0	0	0	0	0	0	0
'SLC12A2'	0	0	0	0.331362	0	0	0.480879	0.347722	0	0	0	0	0	0	0	0	0	0	0	0	0
'TNFAIP8L1'	0	0	0	0.707029	0	0	0	0.346641	0	0	0	0	0	0	0	0	0	0	0	0	0
'CRYBG3'	0	0	0	0	0	0	0	0.318955	0	0	0	0	0	0	0	0	0	0	0	0	0
'DDX18'	0	0	0	0	0	0.408581	0	0.280184	0	0	0	0	0	0	0	0	0	0	0	0	0
'UPF2'	0	0	0	0	0	0	0	0.273656	0	0	0	0	0	0	0	0	0	0	0	0	0
'FAM167B'	0	0	0	1.15431	1.12685	0	0	0	0	0	0	0	0	0	0	0	0	0	0	0	0
'SERTM1'	0	0	0	0	0.806911	0	0	0	0	0	0	0	0	0	0	0	0	0	0	0	0
'IL6'	0	0	0.322211	0	0.679857	1.62392	0.751237	0	0	0	0	0	0	0	0	0	0	0	0	0	0
'C10H1orf115'	0	0	0	1.03419	0.601821	0	0	0	0	0	0	0	0	0	0	0	0	0	0	0	0
'CD36'	0	0	0	0.802895	0.578503	0.698916	0	0	0	0	0	0	0	0	0	0	0	0	0	0	0
'CCL26'	0	0	0	0	0.561352	0	0	0	0	0	0	0	0	0	0	0	0	0	0	0	0
'HOXB7'	0	0	0	0.439856	0.527315	0	0	0	0	0	0	0	0	0	0	0	0	0	0	0	0
'SELP'	0	0	0	0	0.379835	0	0	0	0	0	0	0	0	0	0	0	0	0	0	0	0
'CXCL9'	0	0	0	0	0.352341	0	0.329067	0	0	0	0	0	0	0	0	0	0	0	0	0	0
'BTNL9'	0	0	0	1.66988	0	0	0	0	0	0	0	0	0	0	0	0	0	0	0	0	0
FABP4'	0	0	0.974662	0.732577	0	1.08424	0	0	0	0	0	0	0	0	0	0	0	0	0	0	0
'SLPI'	0	0	0	0.719808	0	0	0	0	0	0	0	0	0	0	0	0	0	0	0	0	0
'LOC100521647'	0	0	0	0.273488	0	0	0	0	0	0	0	0	0	0	0	0	0	0	0	0	0
'C6H1orf64'	0	0	0	0.270239	0	0	0	0	0	0	0	0	0	0	0	0	0	0	0	0	0
'IFIT2'	0	0	0	0.265576	0	0	0	0	0	0	0	0	0	0	0	0	0	0	0	0	0
LPL'	0	0	0	0	0	0	1.89817	0	0	0	0	0	0	0	0	0	0	0	0	0	0
'LOC100521659'	0	0	0.332233	0	0	0	1.83196	0	0	0	0	0	0	0	0	0	0	0	0	0	0
CA4'	0	0	0	0	0	0	1.29984	0	0	0	0	0	0	1.01309	0	0	0	0	0	0	0
HIGD1B'	0	0	0.291428	0	0	0.725572	1.14974	0	0	0	0	0	0	0	0	0	0	0	0	0	0
PLAU'	0	0	0.702484	0	0	1.68047	1.03687	0	0	0	0	0	0	0	0	0	0	0	0	0	0
SLC7A2'	0	0	0.973807	0	0	0.91262	1.02663	0	0	0	0	0	0	0	0	0	0	0	0	0	0
ITGA1'	0	0	0.458289	0	0	0.574529	0.826931	0	0	0	0	0	0	0	0	0	0	0	0	0	0
FRMD3'	0	0	0.811677	0	0	1.00964	0.799999	0	0	0	0	0	0	0	0	0	0	0	0	0	0
CCL2'	0	0	1.065	0	0	1.70771	0.768262	0	0	0	0	0	0	0	0	0	0	0	0	0	0
'ABCC9'	0	0	0.542314	0	0	0.861359	0.758296	0	0	0	0	0	0	0	0	0	0	0	0	0	0
'RGS7BP'	0	0	0.405996	0	0	0.265582	0.731751	0	0	0	0	0	0	0	0	0	0	0	0	0	0
'ANO1'	0	0	0	0	0	0.434495	0.728234	0	0	0	0	0	0	0	0	0	0	0	0	0	0
'ADAP2'	0	0	0	0	0	0.308004	0.707764	0	0	0	0	0	0	0	0	0	0	0	0	0	0
GUCY1A2'	0	0	0.748575	0	0	0.675159	0.620662	0	0	0	0	0	0	0	0	0	0	0	0	0	0
'CXCL10'	0	0	0	0	0	0	0.603587	0	0	0	0	0	0	0	0	0	0	0	0	0	0
'OLFM2'	0	0	0.318982	0	0	0.278957	0.505568	0	0	0	0	0	0	0	0	0	0	0	0	0	0
PAPPA'	0	0	0.857583	0	0	0.535772	0.497222	0	0	0	0	0	0	0	0	0	0	0	0	0	0
'ANGPTL4'	0	0	0	0	0	1.17795	0.482754	0	0	0	0	0	0	0	0	0	0	0	0	0	0
'LOC110256043'	0	0	0.953909	0	0	0.600025	0.470771	0	0	0	0	0	0	0	0	0	0	0	0	0	0
KIF6'	0	0	1.18463	0	0	0.436221	0.444612	0	0	0	0	0	0	0	0	0	0	0	0	0	0
'SYTL2'	0	0	1.33541	0	0	0	0.367803	0	0	0	0	0	0	0.982826	0	0	0	0	0	0	0
'ANGPT1'	0	0	0.669309	0	0	0.551979	0.358853	0	0	0	0	0	0	0	0	0	0	0	0	0	0
'MAP2'	0	0	0.298173	0	0	0.320039	0.295819	0	0	0	0	0	0	0	0	0	0	0	0	0	0
'BDNF'	0	0	0	0	0	0.386168	0.289597	0	0	0	0	0	0	0	0	0	0	0	0	0	0
'ENPEP'	0	0	0.473998	0	0	0.861581	0	0	0	0	0	0	0	0	0	0	0	0	0	0	0
'HGF'	0	0	0.627457	0	0	0.821099	0	0	0	0	0	0	0	0	0	0	0	0	0	0	0
'RSPH6A'	0	0	0	0	0	0.629175	0	0	0	0	0	0	0	0	0	0	0	0	0	0	0
'PER3'	0	0	0	0	0	0.629008	0	0	0	0	0	0	0	0	0	0	0	0	0	0	0
'DES'	0	0	0.294808	0	0	0.554517	0	0	0	0	0	0	0	1.81433	0	0	0	0	0	0	0
'RNASEL'	0	0	0	0	0	0.508839	0	0	0	0	0	0	0	0	0	0	0	0	0	0	0
'CNOT10'	0	0	0	0	0	0.431719	0	0	0	0	0	0	0	0	0	0	0	0	0	0	0
'EPHA5'	0	0	0	0	0	0.394799	0	0	0	0	0	0	0	0	0	0	0	0	0	0	0
'EPN2'	0	0	0	0	0	0.311424	0	0	0	0	0	0	0	0	0	0	0	0	0	0	0
'EBF2'	0	0	0.33645	0	0	0.259299	0	0	0	0	0	0	0	0	0	0	0	0	0	0	0
ADAMTS5'	0	0	0.780651	0	0	0	0	0	0	0	0	0	0	0	0	0	0	0	0	0	0
'TTLL7'	0	0	0.654436	0	0	0	0	0	0	0	0	0	0	0.723273	0	0	0	0	0	0	0
'SFRP4'	0	0	0.571308	0	0	0	0	0	0	0	0	0	0	1.1705	0	0	0	0	0	0	0
'PTPRR'	0	0	0.449164	0	0	0	0	0	0	0	0	0	0	0.706771	0	0	0	0	0	0	0
'PENK'	0	0	0.392442	0	0	0	0	0	0	0	0	0	0	1.94767	0	0	0	0	0	0	0
'LOC100514340'	0	0	0.325145	0	0	0	0	0	0	0	0	0	0	0	0	0	0	0	0	0	0
'SPIRE1'	0	0	0.305009	0	0	0	0	0	0	0	0	0	0	0.313133	0	0	0	0	0	0	0
'TRIM44'	0	0	0.276784	0	0	0	0	0	0	0	0	0	0	0.345592	0	0	0	0	0	0	0
'GAP43'	0	0	0	0	0	0	0	0	0	0	0	0	0	0.895166	0	0	0	0	0	0	0
'PRUNE2'	0	0	0	0	0	0	0	0	0	0	0	0	0	0.557876	0	0	0	0	0	0	0
'MTIF2'	0	0	0	0	0	0	0	0	0	0	0	0	0	0.301335	0	0	0	0	0	0	0
