# Supplementary material for: A single-cell transcriptome atlas of pig skin characterizes anatomical positional heterogeneity
Source: eLife. 2023 Jun 5;12:e86504. doi: 10.7554/eLife.86504 (PMC10241519; doi:10.7554/eLife.86504)
Supplement: Figure 3—source data 1. [file elife-86504-fig3-data1.xlsx]

## Sheet:  Back-vs-Abdomen
Gene Symbol	log2fc (CH_Back / CH_Abdomen)
'PTX3'	0.411362
'MAP1B'	0.354891
'NFKB1'	0.350315
'UACA'	0.333773
'BCAS2'	0.332941
'APOE'	0.326947
'REL'	0.319719
'CHD1'	0.310347
'GOLGA4'	0.308591
'APOD'	0.307957
'ISG15'	0.303669
'PTGS2'	0.298971
'JMJD1C'	0.295418
'ARID4A'	0.292857
'KIF6'	0.287249
'ANO1'	0.284266
'GRAMD2B'	0.275383
'ANGPT2'	0.274268
'PPIG'	0.272388
'AKAP9'	0.27109
'TPR'	0.271014
'AHI1'	0.268019
'S100A4'	0.266768
'NIN'	0.26644
'TPM3'	0.261884
'HSPH1'	0.261044
'TFPI2'	0.259608
'TXNRD1'	0.257505
'ETV3'	0.25666
'DDX46'	0.252159
'NES'	0.251729
'LOC100525396'	0.426807
'SERPINE1'	0.318638
'FABP4'	0.305929
'SOX4'	0.302402
'GLUL'	0.298157
'ABCC9'	0.28932
'SYNE2'	0.28321
'ANGPTL4'	0.279063
'RRAD'	0.278828
'P3H2'	0.277762
'MGP'	0.273546
'PTPN1'	0.272135
'HSP70.2'	0.269995
'PRKG1'	0.269845
'AKAP12'	0.268712
'LRRC43'	0.261835
'PLXDC2'	0.257232
'CLIP1'	0.254103
'BIRC3'	0.251781
'IL6'	0.447692
'FILIP1L'	0.380741
'PLAU'	0.373114
'EGR1'	0.349397
'LOC100127131'	0.336088
'BAZ1B'	0.334346
'FILIP1'	0.327033
'RELL1'	0.324465
'CHD2'	0.322652
'CCL2'	0.32195
'PDE3A'	0.313953
'GRK5'	0.313433
'AFAP1L2'	0.305305
'RYR2'	0.303078
'BPTF'	0.296919
'APOLD1'	0.296424
'RGS16'	0.294423
'AVPR1A'	0.291333
'JMY'	0.288071
'UPF2'	0.286352
'CTGF'	0.28564
'GADD45G'	0.285571
'HAS1'	0.282209
'SYNM'	0.280804
'TAOK3'	0.276836
'CCDC14'	0.275642
'ATP2B1'	0.2749
'FRMD3'	0.273368
'FABP5'	0.271971
'XG'	0.266991
'INSIG1'	0.264271
'PHIP'	0.263892
'NKTR'	0.262199
'NR4A3'	0.259499
'PITPNC1'	0.257646
'DNAJB1'	0.257198
'IFI6'	0.256675
'ADAMTS9'	0.252098
'IWS1'	0.25019
'RSPH6A'	0.353387
'CD36'	0.353323
'MAFB'	0.337902
'CTR9'	0.333723
'LPL'	0.331265
'ATF3'	0.330388
'PER3'	0.32139
'BAZ1A'	0.319879
'RGS2'	0.318536
'TIPARP'	0.317168
'PLIN2'	0.31471
'CCPG1'	0.307315
'IL2RA'	0.298764
'SLC12A2'	0.296949
'FAM46A'	0.295575
'ACTA2'	0.295271
'DDR2'	0.29241
'STMN1'	0.292236
'ICAM1'	0.29051
'DUSP1'	0.284452
'GOLGB1'	0.284411
'MYH11'	0.281405
'ADGRF5'	0.281344
'THOC2'	0.278251
'HSPA8'	0.277299
'BOD1L1'	0.276812
'PHLDA1'	0.275939
'TTC3'	0.275368
'GUCY1A2'	0.27282
'HBEGF'	0.272412
'COL5A2'	0.27169
'RUNX1'	0.271015
'SGK1'	0.266542
'DDIT4'	0.265967
'PLCL1'	0.265391
'SQSTM1'	0.264823
'SAT1'	0.263833
'SLK'	0.262765
'SLC7A2'	0.261947
'DTNB'	0.258978
'FAM111A'	0.258211
'KIAA1551'	0.257792
'CACNB2'	0.257582
'PDE1C'	0.257426
'TUBB2B'	0.256719
'REV3L'	0.253733
'TENM2'	0.251215
'RGS5'	0.250356
'RCAN1'	0.250227
'DMXL2'	0.363888
'RUFY2'	0.353512
'FAM129A'	0.290626
'DLG2'	0.260106
'CIR1'	0.25456
'VCAM1'	0.351618
'ID3'	0.316
'PLXNC1'	0.287006
'ARL5B'	0.274179
'C1S'	0.264204
'SLC2A9'	0.261696
'ARL4A'	0.253985

## Sheet:  Back-vs-Head
Gene Symbol	log2fc (CH_Back / CH_Head)
'S100A4'	0.387878
'GOLGA4'	0.28584
'SYNE2'	0.270693
'TPR'	0.274287
'KIF6'	0.448806
'TIMP1'	0.25748
'TFPI2'	0.256573
'AKAP9'	0.339797
'DDR2'	0.250677
'FILIP1L'	0.26935
'LPL'	0.33512
'UACA'	0.296256
'AKAP12'	0.274315
'RGS5'	0.265186
'HSP70.2'	0.268405
'APOE'	0.299104
'GADD45G'	0.255871
'APOD'	0.305102
'IL6'	0.298467
'CHD1'	0.284933
'IFI6'	0.284232
'NIN'	0.27202
'HAS1'	0.264007
'JMJD1C'	0.26262
'BAZ1A'	0.251917
'PLCL1'	0.307033
'RRAD'	0.304871
'SLC12A2'	0.282407
'CHD2'	0.274146
'ATP2B1'	0.272829
'BOD1L1'	0.267041
'HGF'	0.266216
'ATF3'	0.264587
'CDC40'	0.261324
'FABP4'	0.260406
'PHIP'	0.25252
'GOLGB1'	0.250229
'DMXL2'	0.319356
'S1PR3'	0.307693
'PLAU'	0.286636
'FILIP1'	0.273615
'PPIG'	0.257861
'RELL1'	0.255804
'PTX3'	0.455646
'PTGS2'	0.376145
'CXCL10'	0.353684
'SPEN'	0.347215
'ANGPT2'	0.345501
'NFKB1'	0.344226
'REL'	0.336376
'HSPH1'	0.330765
'CSRP2'	0.322365
'AHI1'	0.316569
'FAM111A'	0.316444
'MAP1B'	0.307878
'MYH11'	0.299904
'DDX46'	0.299716
'TPM3'	0.290907
'ETV3'	0.2883
'ZC3H13'	0.28749
'SOX4'	0.283919
'ARID4A'	0.283218
'GRAMD2B'	0.281648
'ITGA1'	0.280936
'ADIRF'	0.277679
'ISG15'	0.275397
'PRPF4B'	0.27425
'SOD2'	0.272855
'USP53'	0.271799
'TNFAIP6'	0.264749
'LOC100525346'	0.263501
'FRMD3'	0.261165
'DUSP1'	0.258203
'TIPARP'	0.255068
'TGFB1'	0.254377
'COL12A1'	0.252963
'RRBP1'	0.251228
'SMC4'	0.250092
'ANO6'	0.2746
'PRUNE2'	0.26865
'LGALS3'	0.259923

## Sheet: Back-vs-Ear
Gene Symbol	log2fc (CH_Back / CH_Ear)
'RSPH6A'	0.393687
'MAFB'	0.35877
'EGR1'	0.356144
'AFAP1L2'	0.355245
'LPL'	0.351844
'NES'	0.33915
'RGS5'	0.313634
'SYNE2'	0.301521
'SLC12A2'	0.291912
'CD36'	0.287355
'PLIN2'	0.283233
'CTR9'	0.281844
'PLCL1'	0.27918
'PER3'	0.268058
'MAP1B'	0.267422
'P3H2'	0.257319
'SGK1'	0.251898
'RYR2'	0.253772
'BCAS2'	0.277022
'TFPI2'	0.409964
'ADORA2A'	0.300699

## Sheet: Back-vs-Leg
Gene Symbol	log2fc (CH_Back / CH_Leg)
'KIF6'	0.359241
'LOC100525396'	0.342704
'RRAD'	0.326978
'APOE'	0.322852
'LOC110256043'	0.300424
'SYNE2'	0.298517
'HSPH1'	0.285581
'FABP4'	0.284857
'SERPINE1'	0.282151
'NIN'	0.278097
'FILIP1L'	0.277799
'TXNRD1'	0.270332
'GADD45G'	0.265823
'AKAP12'	0.262206
'SOX4'	0.259808
'ANGPT2'	0.259613
'PTX3'	0.354066
'BCAS2'	0.351107
'HSP70.2'	0.321619
'CXCL10'	0.313235
'CHD2'	0.308257
'PTGS2'	0.291218
'UACA'	0.288081
'REL'	0.275789
'TPR'	0.272646
KIF6'	0.263512
'AKAP9'	0.257398
'BPTF'	0.256832
'STK17A'	0.256804
'BAZ1A'	0.255239
'PRPF4B'	0.250782
'AFAP1L2'	0.430747
'GLUL'	0.416794
'RSPH6A'	0.405202
'MAFB'	0.350488
'DUSP1'	0.318404
'C17H8orf4'	0.315162
'APOD'	0.313425
'BAZ1B'	0.312148
'ATF3'	0.311211
'PLK2'	0.305485
'ZC3H13'	0.304481
'CD36'	0.301741
'FABP5'	0.30051
'VCAM1'	0.300343
'PLIN2'	0.298445
'PHIP'	0.297927
'SLC12A2'	0.294431
'SGK1'	0.293484
'SQSTM1'	0.29287
'STMN1'	0.287008
'MYH11'	0.286105
'ABCC9'	0.27912
'IL6'	0.276918
'RASD1'	0.275023
'GRK5'	0.273905
'ICAM1'	0.273802
'HSPA8'	0.273658
'TIPARP'	0.273141
'TGFB1'	0.272128
'GOLGA4'	0.271349
'NES'	0.27065
'SLC7A2'	0.26824
'PIK3R1'	0.267166
'ATP2B1'	0.266617
'FAM46A'	0.266441
'MAP1B'	0.266059
'PER3'	0.26599
'TTC3'	0.264684
'MGP'	0.263638
'DDIT4'	0.263499
'ARID4A'	0.263254
'GOLGB1'	0.262402
'C1S'	0.259168
'BFAR'	0.258919
'COL5A2'	0.258162
'TAOK3'	0.257318
'TPM3'	0.25351
'HBEGF'	0.253381
'GRAMD2B'	0.250205
'LPL'	0.293596
'LOC100127131'	0.27927
'RUFY2'	0.256728
'MYO1B'	0.2532
'TFPI2'	0.472743
'ARF4'	0.441139
'PLAU'	0.309688
'JMY'	0.282977
'THOC2'	0.265093
'SAT1'	0.254955
'ISG15'	0.333583
'GTF2F2'	0.26485

## Sheet: Back-vs-SH
Gene Symbol	log2fc (CH_Back / CH_SH)
'KIF6'	0.54526
'HSP70.2'	0.428069
'UACA'	0.412292
'IL6'	0.392452
'GLUL'	0.389866
'APOE'	0.38667
'AKAP9'	0.383537
'SYNE2'	0.383363
'GADD45G'	0.375053
'LOC110256043'	0.367494
'SOX4'	0.367423
'S100A4'	0.36567
'FILIP1L'	0.365399
'RRAD'	0.364739
'TSC22D1'	0.352042
'FRMD3'	0.347368
'LPL'	0.340698
'AKAP12'	0.338409
'GOLGA4'	0.33793
'HSPH1'	0.337626
'MGP'	0.337089
'APOD'	0.336374
'ARID4A'	0.329376
'GPC3'	0.327535
'ADAMTS1'	0.327119
'NIN'	0.325601
'RYR2'	0.32517
'FABP4'	0.322593
'ID3'	0.322592
'MAP1B'	0.312532
'XG'	0.307993
'RASD1'	0.306569
'MYH11'	0.305963
'BIRC3'	0.30588
'TPR'	0.305717
'TFPI2'	0.302465
'FGF7'	0.302394
'DDR2'	0.300003
'ICAM1'	0.299779
'IFI6'	0.299687
'DUSP1'	0.296393
'SQSTM1'	0.295679
'HGF'	0.294657
'AVPR1A'	0.292419
'PPIG'	0.292261
'CXCL12'	0.292138
'PRKG1'	0.28882
'JMJD1C'	0.288497
'DNAJB1'	0.28731
'ANO6'	0.287003
'RGS5'	0.285458
'TAOK3'	0.284192
'CFD'	0.282356
'RARRES2'	0.282325
'ANGPT2'	0.282066
'AEBP1'	0.281454
'ZC3H13'	0.281292
'GOLGB1'	0.279963
'PHIP'	0.276039
'ITIH4'	0.275819
'LOC100525396'	0.273978
'ISG15'	0.273794
'ANGPTL4'	0.273471
'VCAM1'	0.273421
'TPM3'	0.266976
'ABCC9'	0.266547
'SYTL2'	0.266013
'PHLDA1'	0.265376
'GGTA1P'	0.264852
'P3H2'	0.263531
'LMOD1'	0.262813
'CHD2'	0.261241
'TIMP1'	0.260093
'PLXDC2'	0.259583
'LRRC43'	0.25695
'SELENOP'	0.256277
'SPAG9'	0.255408
'BAZ1B'	0.254386
'CLIP1'	0.253545
'CYCS'	0.253461
'SAT1'	0.252902
'CTSB'	0.2501
'PLAU'	0.588765
'PRPF4B'	0.432829
'REL'	0.419047
'TXNRD1'	0.404547
'BAZ1A'	0.403932
'FILIP1'	0.376248
'GRAMD2B'	0.374897
'APOLD1'	0.372465
'BPTF'	0.359495
'IL2RA'	0.358748
'GEM'	0.347237
'DNAJA1'	0.342617
'FN1'	0.339775
'ETV3'	0.336157
'RUFY2'	0.3337
'LOC100127131'	0.329995
'FABP5'	0.329427
'GRK5'	0.326834
'MYLK'	0.318848
'JMY'	0.31744
'C17H8orf4'	0.317152
'ATP2B1'	0.3152
'UPF2'	0.314508
'CCL2'	0.314202
'SBNO1'	0.313668
'SYNM'	0.313545
'AFAP1L2'	0.310581
'C1S'	0.309111
'CRYAB'	0.306689
'AHI1'	0.303099
'IWS1'	0.301714
'INSIG1'	0.30125
'S1PR3'	0.296516
'THOC2'	0.295839
'COL12A1'	0.295779
'RELL1'	0.295552
'C1R'	0.292314
'NKTR'	0.285949
'BDP1'	0.283201
'CEP83'	0.281118
'SPEN'	0.280248
'DDX18'	0.280239
'FKBP9'	0.278809
'CTR9'	0.277813
'CRTC3'	0.277596
'SQLE'	0.276364
'PDE3A'	0.276174
'TIPARP'	0.275204
'PLIN2'	0.274708
'CCDC88A'	0.272551
'CYR61'	0.269617
'ARRDC3'	0.269095
'SLK'	0.267832
'SLC7A2'	0.264872
'PITPNC1'	0.264378
'PAK1'	0.263933
'COL5A2'	0.263188
'PRSS23'	0.263023
'TGFB1'	0.257485
'MYO1E'	0.256861
'PLCE1'	0.256764
'MAP3K7CL'	0.255955
'STK17A'	0.254359
'ANO3'	0.254075
'CXCL2'	0.253149
'SMC1A'	0.252474
'SMC4'	0.250638
'SOD2'	0.250575
'CXCL10'	0.352958
'BOD1L1'	0.288919
'PTX3'	0.408622
'PHACTR2'	0.253636
'FAM111A'	0.277333
'ANO1'	0.288811
'OLFM2'	0.273905
'RRBP1'	0.252767
'SLC12A2'	0.286411
'RUNX1'	0.289253
'PTGS2'	0.373436
'NES'	0.277983
'BCAS2'	0.375422
'H2AFZ'	0.267076
'TGFB3'	0.273613
'C1QTNF1'	0.268088
'ADIRF'	0.289344
'SERPINF1'	0.25735
'SPARCL1'	0.315204
'RSPH6A'	0.423612
'CD36'	0.374188
'ID1'	0.371892
'MAFB'	0.362056
'PER3'	0.358941
'ATF3'	0.356431
'ACTA2'	0.352013
'PIK3R1'	0.34461
'ENPP3'	0.342363
'TTC3'	0.338605
'GNG2'	0.329748
'RCAN1'	0.326876
'ANGPT1'	0.317461
'HEY1'	0.310198
'DTNB'	0.310032
'MYO1D'	0.300894
'LAMA2'	0.298567
'HSPA8'	0.296297
'LOC100623720'	0.296054
'GNG11'	0.294735
'SGK1'	0.29415
'STMN1'	0.290322
'ADAP2'	0.288169
'DDIT4'	0.287619
'RGS2'	0.287131
'DMD'	0.287079
'FAM46A'	0.286392
'PLK2'	0.282364
'CUL2'	0.281729
'ADGRF5'	0.280166
'RASL11A'	0.276104
'SULF1'	0.273474
'KIAA1551'	0.269938
'PDE1C'	0.269249
'ASPN'	0.265051
'USP53'	0.259297
'COL6A3'	0.255719
'PHF3'	0.250016
'DMXL2'	0.383367
'FAM129A'	0.371667
'SLC2A9'	0.351516
'MFAP1'	0.344137
'DLG2'	0.330675
'NOV'	0.327286
'CTGF'	0.325997
'CIR1'	0.320329
'C14H10orf10'	0.317554
'CDC5L'	0.316171
'NEXN'	0.303682
'SLC8A1'	0.294213
'KLHL23'	0.294044
'CASQ2'	0.282969
'GIGYF2'	0.277752
'ARL4A'	0.276733
'SLA-1'	0.274282
'ITGA8'	0.271281
'KCNAB1'	0.266912
'BBX'	0.266751
'SUPT16H'	0.265349
'ANGPTL1'	0.265179
'TCAP'	0.263164
'ITSN2'	0.26313
'THBS1'	0.258805
'BTBD11'	0.257517
'MYOM1'	0.257278
'ALCAM'	0.254392
'KCNA5'	0.25125
'RGS1'	0.416846
'PRUNE2'	0.387636
'PLXNC1'	0.377809
'PLCB1'	0.343305
'PTPRR'	0.336798
'CHD9'	0.316774
'SLC39A11'	0.303764
'CD83'	0.292327
'TTLL7'	0.289126
'CWF19L2'	0.283775
'CNTNAP2'	0.282978
'CTSK'	0.281297
'NSRP1'	0.266984
'CST3'	0.263696
'ALDH16A1'	0.258584
'ADORA2A'	0.255706
'SMC2'	0.250034

## Sheet: SH-vs-Abdomen
Gene Symbol	log2fc (CH_SH / CH_Abdomen)
'TPR'	-0.253741
'CA4'	-0.260709
'STK17A'	-0.272326
'GOLGA4'	-0.276073
'AKAP9'	-0.286856
'COL12A1'	-0.29025
'LOC100521659'	-0.315669
'APOD'	-0.321638
'LPL'	-0.330029
'KIF6'	-0.3825
'S100A4'	-0.406231
'MAP1B'	-0.250447
'IFNAR2'	-0.252755
'PDE1C'	-0.262122
'HSP70.2'	-0.264493
'PPIG'	-0.27236
'BAZ1A'	-0.27984
'ITGA1'	-0.282715
'IL6'	-0.294508
'NIN'	-0.29769
'ANO6'	-0.254718
'PHIP'	-0.257164
'ENPP3'	-0.264269
'SYNE2'	-0.275476
'ARID4A'	-0.290758
'RYR2'	-0.299757
'CXCL10'	-0.448858
'CXCL9'	-0.252015
'GOLGB1'	-0.273084
'DDX46'	-0.253144
'DPT'	-0.264639
'ADAP2'	-0.252456
'MACF1'	-0.262507
'RBBP6'	-0.260195
'AFAP1L2'	-0.255473
'FAM111A'	-0.280408
'UACA'	-0.364712
'REL'	-0.278641
'FILIP1L'	-0.322258
'BCAS2'	-0.336282

## Sheet: SH-vs-Head
Gene Symbol	log2fc (CH_SH / CH_Head)
'TFPI2'	0.362329
'LPL'	0.350424
'PLAU'	0.28836
'KLHL23'	0.274985
'AKAP9'	0.263931
'IL6'	0.263204
'PRPF4B'	0.258905
'S100A4'	0.405654
'CTGF'	0.403868
'NOV'	0.398923
'KIF6'	0.392192
'LOC100525396'	0.369644
'UACA'	0.324677
'SERPINE1'	0.319416
'CHD1'	0.317368
'FILIP1L'	0.308461
'ID3'	0.301886
'GOLGB1'	0.29554
'AKAP12'	0.29432
'TPR'	0.292909
'TGFB3'	0.289231
'GADD45G'	0.286599
'RGS5'	0.282716
'ASPN'	0.280892
'TIMP1'	0.280146
'MYH11'	0.278885
'BPTF'	0.276745
'GOLGA4'	0.274136
'TPPP3'	0.271783
'DDR2'	0.271614
'NIN'	0.268287
'SYNM'	0.267542
'NEXN'	0.266643
'RBBP6'	0.265607
'MAP1B'	0.262321
'CSRP2'	0.259394
'ADAMTS5'	0.256482
'TAOK3'	0.252122
'BCAS2'	0.395558
'PLIN2'	0.385182
'SYNE2'	0.374836
'AFAP1L2'	0.361704
'LOC100127131'	0.35759
'ANGPT2'	0.34187
'VCAM1'	0.337876
'FAM111A'	0.321427
'IL2RA'	0.317911
'GNGT1'	0.304862
'SOX4'	0.299052
'RSPH6A'	0.295
'REL'	0.28522
'PTX3'	0.284307
'ID1'	0.280413
'RRAD'	0.279336
'HGF'	0.275833
'ITGA1'	0.274273
'CHD2'	0.273815
'TTC3'	0.273285
'BAZ1A'	0.272181
'LOC100525346'	0.265134
'ETV3'	0.265048
'PPIG'	0.262796
'THOC2'	0.261025
'NKTR'	0.260795
'DTNB'	0.260082
'APOE'	0.258788
'DDX46'	0.2579
'C17H8orf4'	0.25742
'SLC12A2'	0.255169
'GRAMD2B'	0.25218
'PTGS2'	0.453391
'TNFAIP6'	0.351429
'FABP4'	0.301595
'CXCL10'	0.283977
'COL6A5'	0.282793
'CRYAB'	0.279687
'HSPD1'	0.269248
'ANGPT1'	0.267107
'TIPARP'	0.259228
'SH3BP5'	0.258139
'ARID4A'	0.255791
'PRDM1'	0.255382
'BOD1L1'	0.253565
'PAPPA'	0.251947
'LOC396781'	-0.549809
'APOLD1'	0.292008
'BDP1'	0.277094

## Sheet: SH-vs-Ear
Gene Symbol	log2fc (CH_SH / CH_Ear)
'DKK2'	-0.278511
'SERPINE1'	-0.291128
'ADORA2A'	-0.293447
'SUPT7L'	-0.325609
'WIF1'	-0.435884

## Sheet: SH-vs-Leg
Gene Symbol	log2fc (CH_SH / CH_Leg)
'UACA'	0.253757
'TGFB3'	0.262967
'LOC100525396'	0.269678
'GOLGB1'	0.269732
'KIF6'	0.279933
'TFPI2'	0.281628
'SERPINE1'	0.412906
'IL6'	0.47396
'PRPF4B'	0.314883
'FILIP1'	0.279458
'TPR'	0.272979
'PLAU'	0.269686
'FILIP1L'	0.257524
'BCAS2'	0.489958
'AFAP1L2'	0.397748
'PLIN2'	0.372847
'MAP1B'	0.363672
'SOX4'	0.336095
'RSPH6A'	0.326493
'VCAM1'	0.319159
'DTNB'	0.307186
'TIMP1'	0.299718
'MYH11'	0.294915
'BPTF'	0.293081
'NIN'	0.292476
'AKAP9'	0.291949
'RRAD'	0.291745
'LPL'	0.290475
'APOE'	0.282506
'DNAJB1'	0.279928
'MGP'	0.27981
'BAZ1A'	0.27893
'THOC2'	0.277996
'FAM111A'	0.27552
'GRK5'	0.272067
'TTC3'	0.270482
'CUL2'	0.269992
'IL2RA'	0.269076
'RCAN1'	0.268768
'ODC1'	0.265333
'GOLGA4'	0.263427
'RBBP6'	0.261723
'TAOK3'	0.259904
'ADAMTS9'	0.257661
'CHD2'	0.25089
'RGS5'	0.250834
'PPIG'	0.250818
'NKTR'	0.250182
'CXCL10'	0.26996
'C1R'	0.288405
'UPF2'	0.274102
'ESF1'	0.265249
'RUFY2'	0.26401
'PRSS23'	0.255747
'MAP3K7CL'	0.251127
'LOC100127131'	1.02521
'ENPP3'	0.335889
'ID1'	0.315865
'DES'	0.29951

## Sheet: Head-vs-Abdomen
Gene Symbol	log2fc (CH_Head / CH_Abdomen)
'CXCL10'	-0.289335
'S100A4'	-0.302862
'DPT'	-0.296281
'LOC100521659'	-0.289942
'STK17A'	-0.256939
'LPL'	-0.338407
'TNFAIP3'	-0.260828
'APOE'	-0.410911

[truncated: 4 more sheets: Head-vs-Leg, Leg-vs-Abdomen, Leg-vs-Ear, Ear-vs-Abdomen]
