# Supplementary material for: A single-cell transcriptome atlas of pig skin characterizes anatomical positional heterogeneity
Source: eLife. 2023 Jun 5;12:e86504. doi: 10.7554/eLife.86504 (PMC10241519; doi:10.7554/eLife.86504)
Supplement: Figure 4—source data 1. [file elife-86504-fig4-data1.xlsx]

## Sheet:  Back-vs-Abdomen
Gene Symbol	log2fc (CH_Back / CH_Abdomen)
'FABP4'	0.501262
'BFAR'	0.352181
'ARL15'	0.336462
'AKAP9'	0.305638
'MAGI1'	0.296962
'CCSER1'	0.292911
'CD36'	0.288426
'ANO6'	0.287969
'ADAMTS1'	0.287344
'C2H11orf96'	0.281378
'ADORA2A'	0.276525
'MECOM'	0.269399
'CTR9'	0.268923
'CCL2'	0.267794
'SPARCL1'	0.267279
'ARID4A'	0.26677
'FILIP1'	0.266102
'RASD1'	0.265369
'SRSF5'	0.265085
'GLUL'	0.26501
'PITPNC1'	0.262944
'MCTP1'	0.26091
'IL6'	0.257601
'PLAT'	0.257534
'PREX2'	0.256044
'GOLGB1'	0.285226
'GOLGA4'	0.277245
'TPR'	0.275449
'FLT1'	0.274112
'UACA'	0.272187
'TANGO6'	0.270345
'CHD2'	0.267302
'RAPGEF4'	0.256883
'FBN1'	0.254053
'MYO1E'	0.253765
'PCDH17'	0.25371
'ITPR2'	0.252031
'BPTF'	0.251303
'SELE'	0.331363
'GJA5'	0.297654
'MAP1B'	0.285862
'TMEM100'	0.269798
'MFAP5'	0.26409
'PLAU'	0.262018
'CLU'	0.253727
'CYP1A1'	0.250249
'PTX3'	0.422068
'ADAMTS4'	0.335381
'NRXN1'	0.282785
'IFIH1'	0.278431
'PHACTR1'	0.266858

## Sheet:  Back-vs-Head
Gene Symbol	log2fc (CH_Back / CH_Head)
'PLAU'	0.356616
'CCL2'	0.33307
'ARID4A'	0.274386
'ADAMTS1'	0.272048
'PTPRE'	0.266556
'MCTP1'	0.260464
'ADIRF'	0.250515
'ANO6'	0.292293
'ADORA2A'	0.266765
'S100A4'	0.257371
'MMRN1'	0.371032
'FAM25A'	0.335899
'DAB2'	0.326443
'TANGO6'	-0.437852

## Sheet: Back-vs-Ear
Gene Symbol	log2fc (CH_Back / CH_Ear)
'FABP4'	0.318481
'BFAR'	0.299155
'CD36'	0.291952
'MYLK'	0.864986
'MYH11'	0.815364
'SPARCL1'	0.673962
'RGS5'	0.631556
'LPL'	0.566464
'TPM2'	0.558787
'GEM'	0.558051
'IL6'	0.525222
'VCAM1'	0.507679
'TGFB3'	0.504518
'C17H8orf4'	0.421378
'ACTA2'	0.420569
'RRAD'	0.32653
'APOE'	0.324598
'ITIH4'	0.31036
'PLVAP'	0.306447
'AVPR1A'	0.290929
'CRYAB'	0.27824
'PHACTR1'	0.272056
'MAFB'	0.255773
'LMOD1'	0.255423
'LOC100525396'	0.252439
'DDAH1'	-0.250669
'CYYR1'	-0.276193
'LYVE1'	-0.346859
'SERPINE1'	-0.379265
'RNF212B'	-0.779459

## Sheet: Back-vs-Leg
Gene Symbol	log2fc (CH_Back / CH_Leg)
'CD36'	0.341039
'TANGO6'	0.39554
'GOLGB1'	0.307826
'ADORA2A'	0.307626
'UBE2D4'	0.307308
'AKAP9'	0.251674
'CCL2'	0.280238
'TPR'	0.269491
'ARID4A'	0.28993
'FABP4'	0.470235
'ANO6'	0.418752
'MCTP1'	0.359312
'JAK2'	0.310145
'PRPF4B'	0.296961
'MAST4'	0.294618
'ARL15'	0.293646
'HOMER1'	0.286148
'USP53'	0.286108
'TBC1D20'	0.277332
'PDK4'	0.268895
'TGFB1'	0.259739
'SMCHD1'	0.257575
'BFAR'	0.255731
'MERTK'	0.250649
'UACA'	0.296069
'SETX'	0.253219
'IL6'	0.325581
'SELE'	0.308083
'MFAP5'	0.297815
'VPS4B'	0.296642
'PHACTR1'	0.256101

## Sheet: Back-vs-SH
Gene Symbol	log2fc (CH_Back / CH_SH)
'H2AFZ'	0.367734
'SQSTM1'	0.360901
'ANO6'	0.340645
'PTPRE'	0.33983
'ADORA2A'	0.327788
'UBD'	0.317837
'SELE'	0.315104
'ISG15'	0.314204
'ADGRF2'	0.313149
'ADAMTS4'	0.313148
'FAM111A'	0.311881
'LOC100624226'	0.309145
'TIMP1'	0.300721
'BIRC3'	0.300683
'HOMER1'	0.297274
'JAK2'	0.295506
'FLNB'	0.291275
'PRPF4B'	0.287471
'PRSS23'	0.284748
'TM4SF1'	0.281942
'TPR'	0.281542
'GLUL'	0.280994
'UPF2'	0.279923
'THOC2'	0.277074
'ETV3'	0.276029
'CYCS'	0.275762
'CXCL2'	0.273791
'ARID4A'	0.272874
'C2CD4B'	0.272118
'DNAJA1'	0.271709
'PTPRB'	0.271536
'BDKRB2'	0.271374
'TRAF1'	0.269177
'IL33'	0.268615
'PIK3C2A'	0.268558
'SMC4'	0.268058
'REL'	0.26479
'DAB2'	0.264027
'ITPKC'	0.261851
'SEMA7A'	0.26182
'FLT1'	0.261813
'BPTF'	0.26004
'UACA'	0.259559
'SWAP70'	0.258984
'N4BP1'	0.258789
'BDP1'	0.258092
'TGFB1'	0.256099
'NIN'	0.254762
'MYO1E'	0.254669
'TANGO6'	0.469993
'AKAP9'	0.377268
'PITPNC1'	0.339869
'PHACTR2'	0.30226
'PCDH17'	0.30102
'CCL2'	0.299696
'CHD2'	0.296829
'PLAU'	0.294857
'ITPR2'	0.292593
'GOLGB1'	0.292556
'CD36'	0.292054
'RRBP1'	0.290044
'JMJD1C'	0.285842
'TNFSF10'	0.282103
'ARL4A'	0.280494
'ITSN2'	0.277181
'GOLGA4'	0.276739
'KIAA1551'	0.2742
'HSPA6'	0.274101
'FILIP1L'	0.27327
'PRKCH'	0.273243
'NSRP1'	0.271508
'RAPGEF4'	0.271011
'HYAL2'	0.26895
'MGAT5'	0.261397
'UBE2D4'	0.260722
'C17H8orf4'	0.260527
'ZC3H13'	0.259568
'PLCB1'	0.258957
'CNTLN'	0.257888
'TSC22D1'	0.257532
'ARHGEF3'	0.257079
'MAGI1'	0.256749
'CWF19L2'	0.256623
'CCSER1'	0.254846
'ITGA6'	0.253916
'MECOM'	0.253264
'BAZ1A'	0.252625
'SPRY1'	0.251213
'MEOX1'	0.251208
'RASD1'	0.250706
'CDC5L'	0.250221
'TBC1D20'	0.371861
'MCTP1'	0.327233
'CEP112'	0.316914
'PREX2'	0.305335
'FAM208A'	0.302812
'DDX27'	0.291511
'CTR9'	0.291125
'ARL15'	0.289698
'USP53'	0.285808
'TRPM6'	0.283522
'CYP1A1'	0.273011
'CD320'	0.268603
'MARCH3'	0.266859
'CHD7'	0.263572
'SBNO1'	0.263214
'GRK5'	0.260462
'TNFRSF1B'	0.257282
'CHORDC1'	0.25662
'SOX4'	0.256619
'ENPP2'	0.254961
'GJA1'	0.253914
'FILIP1'	0.253759
'LRRC23'	0.641124
'MAST4'	0.558807
'TRAF3'	0.558389
'THBS1'	0.523629
'SLC8A1'	0.504289
'NAV2'	0.499813
'TXNRD1'	0.496302
'SNAPC1'	0.49492
'GNPTAB'	0.491609
'LHFPL2'	0.490377
'ZFC3H1'	0.48298
'EFNB2'	0.481535
'GTF2IRD1'	0.477496
'ST6GALNAC3'	0.473045
'AHI1'	0.471981
'OPHN1'	0.464867
'AUTS2'	0.461255
'SLC12A2'	0.45781
'POU2F1'	0.453769
'SETX'	0.450889
'MAGI3'	0.44903
'PRDM1'	0.446731
'LCK'	0.446726
'DUSP5'	0.444954
'SHROOM4'	0.436346
'ARRDC3'	0.435371
'LOC110255652'	0.432534
'KITLG'	0.427882
'CDH5'	0.426973
'EIF2AK2'	0.425005
'MYO1D'	0.424281
'GBP1'	0.423582
'NBEA'	0.422921
'ARAP3'	0.417261
'ROBO4'	0.416987
'PHACTR4'	0.41269
'ZNF644'	0.412659
'SMCHD1'	0.411693
'MCC'	0.411627
'RELL1'	0.411537
'MACROD2'	0.410408
'IFIH1'	0.409344
'SPEN'	0.40795
'LOC100511937'	0.405807
'LOC100519098'	0.400517
'SERINC5'	0.399495
'KCNN3'	0.398837
'BCR'	0.392138
'BAZ2B'	0.391442
'CHD9'	0.390286
'PLCB4'	0.390216
'DACH1'	0.388906
'MERTK'	0.385705
'CHST11'	0.383289
'POLG2'	0.383162
'NEDD4L'	0.382675
'BCAS2'	0.381278
'DNM3'	0.380289
'BRWD3'	0.378928
'SAT1'	0.377893
'CTIF'	0.376667
'BTBD9'	0.376366
'CTNNAL1'	0.373628
'CLU'	0.373444
'IGF2BP2'	0.37128
'SMAD1'	0.370257
'SLK'	0.369956
'PHACTR1'	0.36834
'ACKR1'	0.365242
'LMCD1'	0.361226
'MX1'	0.35381
'TMEM2'	0.352409
'TPM3'	0.350756
'HSPH1'	0.350469
'RND1'	0.349927
'FOXJ3'	0.349736
'PNP'	0.349255
'RALA'	0.348304
'SH3BP5'	0.345076
'SUFU'	0.344233
'GIGYF2'	0.344079
'CEP83'	0.340469
'SULF1'	0.339156
'ST8SIA4'	0.337626
'RBFOX1'	0.336647
'KIAA1217'	0.335256
'EHD4'	0.334474
'NR5A2'	0.334045
'MAP1B'	0.333425
'FLI1'	0.33282
'RAI14'	0.330371
'RGS2'	0.329749
'GRAMD2B'	0.329566
'TANC2'	0.327798
'HBEGF'	0.32543
'RAPGEF6'	0.324368
'ZNF462'	0.323747
'C14H10orf10'	0.32063
'PLEKHO1'	0.319424
'DDIT4'	0.317954
'MDN1'	0.316962
'IMMP2L'	0.3167
'LPAR6'	0.315608
'ELOVL7'	0.315261
'CLIC5'	0.314519
'TMTC2'	0.313932
'MAFB'	0.312826
'LONRF3'	0.312324
'NEBL'	0.31105
'SLCO2A1'	0.31062
'SCLT1'	0.310017
'TTC3'	0.308863
'CSF2RB'	0.306036
'PDK4'	0.303742
'BBX'	0.301533
'LOC100525396'	0.300926
'VPS13C'	0.298204
'PGAP1'	0.297919
'TIPARP'	0.297586
'CASP7'	0.296986
'FAM167B'	0.296383
'PHIP'	0.295866
'LPCAT2'	0.295648
'SGK1'	0.295405
'UGDH'	0.293027
'FGL2'	0.292894
'FAM13B'	0.290774
'PLEKHG5'	0.289411
'CWC25'	0.289257
'CYTH1'	0.285805
'S1PR1'	0.284927
'TENM3'	0.283791
'LRRN3'	0.283744
'ELMSAN1'	0.283497
'SOX5'	0.282659
'PARP14'	0.281324
'PIEZO2'	0.280966
'CSRP2'	0.280144
'ZNF366'	0.279817
'LOC106509492'	0.279118
'F8'	0.278953
'PRKD1'	0.278935
'DISC1'	0.278767
'ABCB1'	0.278364
'RAPGEF5'	0.278354
'CYLD'	0.27828
'SLC38A1'	0.277883
'CMSS1'	0.276765
'BAZ1B'	0.275823
'COL12A1'	0.274831
'PLVAP'	0.274572
'HMGB2'	0.274503
'COL23A1'	0.274036
'IL15'	0.27107
'CADM1'	0.26897
'DCAF1'	0.268962
'ATP2B1'	0.268433
'SPATA5'	0.268165
'CLEC1A'	0.268073
'SH3RF2'	0.267944
'S100A6'	0.265649
'NRP2'	0.264022
'ACTR3B'	0.263215
'CRYBG3'	0.26235
'CCDC15'	0.262235
'TNFAIP8L1'	0.259258
'STPG4'	0.259233
'MMRN2'	0.259163
'BNC2'	0.259112
'NKTR'	0.256349
'SLA-DRA'	0.256112
'PPIG'	0.255328
'ALCAM'	0.254858
'EYS'	0.254266
'CXCL9'	0.253604
'BOD1L1'	0.251859
'CCDC93'	0.251656
'SCFD2'	0.251496
'FAM25A'	0.363731
'KIF21A'	0.342841
'NRXN1'	0.295335
'CCDC170'	0.278766
'ZNF521'	0.277707
'HOXB7'	0.2758
'EYA1'	0.265496
'MYH11'	-0.259172
'C3H2orf40'	-0.263388

## Sheet: SH-vs-Abdomen
Gene Symbol	log2fc (CH_SH / CH_Abdomen)
'TANGO6'	-0.354299
'MCTP1'	-0.286342
'GNPTAB'	-0.286415
'CXCL9'	-0.289262
'S100A4'	-0.292686
'HOMER1'	-0.339663
'FABP4'	0.352737
'GOLGB1'	-0.291318
'JMY'	-0.253817
'CHD2'	-0.255091
'TMTC1'	-0.260704
'TPPP3'	-0.27284
'TFPI2'	-0.273849
'CYYR1'	-0.275993
'HOXB7'	-0.286723
'SLC8A1'	-0.294002
'THSD4'	-0.307611
'LYVE1'	-0.334701
'RNF212B'	-0.340155
'SCG3'	-0.385907

## Sheet: SH-vs-Head
Gene Symbol	log2fc (CH_SH / CH_Head)
'CCL2'	0.262541
'ADORA2A'	0.279236
'CXCL14'	0.254238
'PLAU'	0.253665
'FABP4'	0.496209
'C2H11orf96'	0.300861
'CYCS'	0.276326
'RGS16'	0.261905
'CD36'	0.254297
'ADAMTS4'	0.589502
'SCG3'	0.525642
'MGP'	0.505907
'LYVE1'	0.467368
'POSTN'	0.453808
'EXTL3'	0.420815
'C3H2orf40'	0.416923
'MYH11'	0.407044
'ACTA2'	0.383042
'HYAL2'	0.376358
'CCDC80'	0.35559
'GOLGB1'	0.34647
'RFC1'	0.343589
'BOD1L1'	0.325386
'FOXJ3'	0.290917
'PRPF4B'	0.289668
'SMC4'	0.289331
'FAM13B'	0.286091
'FN1'	0.285605
'MGAT5'	0.285308
'SYNE2'	0.279424
'GOLGA4'	0.277893
'OMD'	0.276832
'PPIG'	0.271649
'BBX'	0.267941
'TPM2'	0.265624
'ARID4A'	0.264348
'REV3L'	0.260779
'CUL2'	0.259409

## Sheet: SH-vs-Ear
Gene Symbol	log2fc (CH_SH / CH_Ear)
'KIF6'	0.331184
'PTPRE'	-0.252667
'ATRX'	-0.257023
'FBN1'	-0.257919
'THOC2'	-0.259207
'PLCB1'	-0.310472
'FABP4'	0.321125
'CD74'	-0.250277
'VPS13C'	-0.251609
'DSTN'	-0.252763
'BST1'	-0.253075
'TIMP1'	-0.253315
'FLI1'	-0.256281
'MACROD2'	-0.25633
'SLK'	-0.25758
'DDAH1'	-0.257858
'STON2'	-0.258771
'PUM3'	-0.259306
'KLHL4'	-0.259545
'CNTNAP2'	-0.259734
'RNF212B'	-0.259758
'RAMP3'	-0.261047
'RFX2'	-0.26119
'CFLAR'	-0.261713
'UPF2'	-0.263004
'BAZ2B'	-0.263863
'MYH10'	-0.263978
'CNTN4'	-0.266083
'MEIS2'	-0.266396
'LAMB1'	-0.266481
'EMCN'	-0.268196
'NHSL1'	-0.268901
'ATP2B1'	-0.270168
'CDC5L'	-0.270884
'NHSL2'	-0.27171
'PHACTR2'	-0.273772
'MGAT5'	-0.275634
'PITPNC1'	-0.275792
'CHD1'	-0.277699
'SLC41A1'	-0.278222
'PRPF4B'	-0.278482
'ADAMTSL1'	-0.278772
'CHD7'	-0.279191
'RHOJ'	-0.279595
'PTPRM'	-0.280147
'PODXL'	-0.281732
'SERINC5'	-0.28235
'PRKCH'	-0.283179
'CYYR1'	-0.287423
'BBX'	-0.287646
'SCAPER'	-0.2877
'RBBP6'	-0.291015
'LOC100525346'	-0.291631
'TSHZ2'	-0.293314
'OPHN1'	-0.294403
'ZC3H13'	-0.296633
'DLGAP1'	-0.29924
'MTMR12'	-0.300189
'ITSN2'	-0.3002
'SYNE2'	-0.300592
'TENM2'	-0.301978
'CCDC88A'	-0.303828
'TGFB1'	-0.304554
'MYO1D'	-0.304972
'BPTF'	-0.305095
'TNXB'	-0.305896
'DMD'	-0.309656
'FLNB'	-0.31017
'TTC3'	-0.310999
'ITM2A'	-0.312007
'TRIM56'	-0.312455
'UACA'	-0.314786
'RTN1'	-0.316011
'TPR'	-0.32226
'BOD1L1'	-0.325074
'MAGI1'	-0.326481
'ARID4A'	-0.326889
'PLXDC2'	-0.327958
'CEP290'	-0.329698
'THSD4'	-0.330186
'SMC1A'	-0.330511
'SLC8A1'	-0.330556
'PPIG'	-0.332497
'MAGI2'	-0.332921
'LOC100626318'	-0.340676
'RYR2'	-0.356596
'AFF3'	-0.358478
'SYNPR'	-0.374534
'GOLGA4'	-0.378066
'BAZ1B'	-0.378385
'MFAP1'	-0.400721
'TPPP3'	-0.404283
'GALNT10'	-0.407083
'TANGO6'	-0.408275
'TANC2'	-0.415917
'MMRN2'	-0.426767
'NEXN'	-0.430591
'GOLGB1'	-0.439341
'PLCB4'	-0.452568
'LYVE1'	-0.461456
'SCG3'	-0.508587
'C3H2orf40'	-0.762875
'SERPINE1'	-0.840546

## Sheet: SH-vs-Leg
Gene Symbol	log2fc (CH_SH / CH_Leg)
'CUL2'	0.272273
'ADORA2A'	0.34186
'FABP4'	0.438283
'CCL2'	0.323466
'IL6'	0.333581
'C3H2orf40'	0.471386
'ADAMTS4'	0.416195
'MYH11'	0.355815
'FOXJ3'	0.303848
'ODC1'	0.299219
'SPC24'	0.294858
'CTGF'	0.286851
'BCAS2'	0.28598
'VASH2'	0.272213
'C2H11orf96'	0.271454
'FGD5'	0.251928

## Sheet: Head-vs-Abdomen
Gene Symbol	log2fc (CH_Head / CH_Abdomen)
'S100A4'	-0.252074
'ADORA2A'	-0.269613
'PARD6G'	0.352092
'FAM13B'	-0.250047
'PHACTR2'	-0.250495
'DAB2'	-0.251961
'NIN'	-0.269774
'SMC4'	-0.27123
'SCIN'	-0.282984
'NKTR'	-0.285107
'HOXB7'	-0.292749
'THSD4'	-0.360866
'GBP1'	-0.456658
'LYVE1'	-0.457689
'SCG3'	-0.511551

[truncated: 5 more sheets: Head-vs-Ear, Head-vs-Leg, Leg-vs-Abdomen, Leg-vs-Ear, Ear-vs-Abdomen]
