# Supplementary material for: A single-cell transcriptome atlas of pig skin characterizes anatomical positional heterogeneity
Source: eLife. 2023 Jun 5;12:e86504. doi: 10.7554/eLife.86504 (PMC10241519; doi:10.7554/eLife.86504)
Supplement: Figure 5—source data 1. [file elife-86504-fig5-data1.xlsx]

## Sheet:  Back-vs-Abdomen
Gene Symbol	log2fc (CH_Back / CH_Abdomen)
'LOC100158001'	0.841833
'TNN'	0.645828
'COL11A1'	0.543242
'IGF1'	0.5366
'SFRP1'	0.477914
'COL6A5'	0.472939
'INHBA'	0.438379
'CXCL14'	0.423931
'LOC110255312'	0.40597
'SPARCL1'	0.399634
'LAMC3'	0.392228
'NTRK2'	0.389018
'NCMAP'	0.387465
'TNC'	0.384515
'THBS1'	0.381986
'NSRP1'	0.354075
'BFAR'	0.351951
'IGF2'	0.351481
'DDR2'	0.348407
'BAZ1B'	0.345084
'LIMCH1'	0.344614
'PITPNC1'	0.338592
'FGF7'	0.338471
'PTN'	0.329651
'CEP295'	0.329129
'ITGA8'	0.32795
'DDX46'	0.327479
'NKTR'	0.322319
'C3'	0.321762
'FMO2'	0.321008
'LOC100520512'	0.320552
'COL8A2'	0.319988
'GOLGA4'	0.318461
'JMJD1C'	0.316494
'FAM180A'	0.313147
'COL6A6'	0.312896
'BAZ2B'	0.310871
'KRT5'	0.308885
'SPINT2'	0.305376
'ZCCHC6'	0.305291
'MBP'	0.304391
'HPSE2'	0.304135
'TAGLN'	0.303743
'TPM2'	0.301782
'TPR'	0.298707
'CHD2'	0.298406
'GADD45G'	0.295519
'FMOD'	0.2931
'HSPA6'	0.290193
'CHD1'	0.288365
'APOD'	0.286995
'BBX'	0.28699
'ADAMTS1'	0.286705
'TTC3'	0.285551
'LTBP1'	0.284706
'COL7A1'	0.283162
'DPEP1'	0.280868
'LEPR'	0.280587
'LOC106508546'	0.279439
'SYNE2'	0.279026
'ACTA2'	0.278313
'HSP70.2'	0.278071
'DLG2'	0.277142
'SCN9A'	0.276067
'ELN'	0.275561
'GRIA2'	0.274743
'CYCS'	0.274168
'NCKAP5'	0.273818
'CIR1'	0.27299
'BTG2'	0.272751
'CPXM1'	0.272633
'RARRES1'	0.270472
'LRRC43'	0.270345
'MAFB'	0.268513
'ITSN2'	0.267878
'FILIP1L'	0.267284
'MYLK'	0.26727
'UPF2'	0.26719
'USP53'	0.267121
'RASD1'	0.265437
'COL6A2'	0.265291
'PLCB4'	0.264853
'LOC100521659'	0.263999
'ACER3'	0.263891
'FBLN1'	0.263222
'PRSS23'	0.263214
'SND1'	0.26289
'CCDC88A'	0.25988
'IGFBP2'	0.258563
'AHCYL2'	0.257544
'MAML2'	0.257225
'ARHGAP24'	0.256915
'NHS'	0.254983
'SPON1'	0.253591
'PENK'	0.253433
'PHIP'	0.251778
'GALNT10'	0.250891

## Sheet:  Back-vs-Head
Gene Symbol	log2fc (CH_Back / CH_Head)
'APOA1'	0.432054
'GOLGA4'	0.410397
'MBP'	0.37811
'TNN'	0.374921
'COL23A1'	0.358757
'PTX3'	0.357439
'NCMAP'	0.332042
'F13A1'	0.331138
'TPR'	0.321067
'RECK'	0.308128
'SFRP4'	0.3051
'DDAH1'	0.303389
'PLCB4'	0.301459
'GOLGB1'	0.299991
'NKTR'	0.298502
'UACA'	0.296759
'JMJD1C'	0.293154
'BOD1L1'	0.292245
'UPF2'	0.288303
'COL6A5'	0.287005
'PTGS2'	0.284956
'MGP'	0.284923
'SPARCL1'	0.284178
'APLF'	0.279601
'BIRC3'	0.277009
'MEIS2'	0.276764
'NUCB2'	0.276215
'CNTN4'	0.27499
'GRIA2'	0.271341
'S1PR1'	0.270613
'ADAMTSL3'	0.268332
'NSRP1'	0.26715
'IWS1'	0.266269
'BAZ1B'	0.266058
'ZNF638'	0.265048
'HERC1'	0.262703
'PRKG1'	0.259938
'PREX2'	0.257682
'SVEP1'	0.25746
'DPT'	0.256489
'IL6'	0.255367
'USP53'	0.254547
'FABP4'	0.253637
'PHF3'	0.250073
'LOC102165485'	-0.4246

## Sheet: Back-vs-Ear
Gene Symbol	log2fc (CH_Back / CH_Ear)
'TNN'	0.705328
'COL11A1'	0.499628
'PTX3'	0.497072
'HPSE2'	0.449526
'HAPLN1'	0.439003
'SYNE2'	0.433788
'TPM2'	0.424147
'MYH11'	0.420667
'S100A4'	0.420101
'ACTA2'	0.407108
'LOC110255312'	0.40449
'ADAMTS1'	0.397722
'PDK4'	0.386617
'LIMCH1'	0.385969
'COL8A2'	0.384715
'IGF1'	0.374699
'SPARCL1'	0.374098
'FMOD'	0.372199
'TPM1'	0.366021
'CXCL14'	0.363058
'INHBA'	0.3597
'ADAMTS17'	0.357513
'BPTF'	0.353364
'MYOC'	0.34727
'CNTN1'	0.34615
'THBS1'	0.345193
'ADM'	0.344274
'FMO2'	0.343603
'ARID4A'	0.340869
'PENK'	0.339663
'BFAR'	0.338038
'COL7A1'	0.337698
'CFAP161'	0.337612
'SLK'	0.33253
'CCDC88A'	0.32903
'CCL19'	0.325342
'HSPA6'	0.324937
'CTGF'	0.324515
'CRABP1'	0.32435
'SOX4'	0.322482
'CTR9'	0.321407
'SCN9A'	0.318076
'SYNM'	0.316787
'AK5'	0.314183
'CHD2'	0.313038
'S1PR1'	0.31278
'LOC100519808'	0.309206
'BIRC3'	0.308716
'LAMC3'	0.305723
'MATN2'	0.304974
'TTC3'	0.304194
'GOLGA4'	0.29838
'NAV2'	0.297196
'RARRES1'	0.295041
'GRIA4'	0.294472
'GRIA2'	0.294154
'RRAD'	0.28948
'MYLK'	0.287913
'GOLGB1'	0.287674
'CYCS'	0.28681
'VCAN'	0.28627
'ITSN1'	0.285614
'LOXL4'	0.283458
'ADAMTS4'	0.282449
'DKK2'	0.282221
'CEP290'	0.276595
'PTGS2'	0.274653
'TRIP11'	0.274637
'NES'	0.274514
'DPT'	0.272499
'BOD1L1'	0.271436
'DDAH1'	0.270868
'SFRP4'	0.270485
'MAFB'	0.270409
'ACER3'	0.269917
'ASPN'	0.26952
'THBS4'	0.2689
'RGS5'	0.267636
'LOC100625479'	0.267103
'PLA2G7'	0.259679
'NFKB1'	0.259195
'JAK2'	0.259142
'BAZ1B'	0.258919
'MGA'	0.258751
'SOD2'	0.258501
'STMN1'	0.257266
'APOD'	0.25689
'DUSP1'	0.256632
'BAZ2B'	0.256372
'APLF'	0.255605
'FST'	0.25324
'DLG2'	0.252815
'SND1'	0.252496
'LTBP2'	0.25248
'COL23A1'	0.251906
'HMGB2'	0.251035
'COL6A5'	-0.280948

## Sheet: Back-vs-Leg
Gene Symbol	log2fc (CH_Back / CH_Leg)
'COL11A1'	0.577746
'ACTA2'	0.438601
'COL6A6'	0.347783
'PTX3'	0.343286
'BFAR'	0.338895
'C3'	0.335734
'ZNF366'	0.308475
'COL6A5'	0.302275
'TPM1'	0.299348
'FMO2'	0.296233
'COL8A2'	0.292238
'IGFBP2'	0.290152
'GRIA2'	0.277124
'AK5'	0.268675
'PHF3'	0.268164
'BPTF'	0.259119
'CNTN5'	0.257263
'PTGS2'	0.253907
'SVIL'	0.252454
'SMC6'	0.25244

## Sheet: Back-vs-SH
Gene Symbol	log2fc (CH_Back / CH_SH)
'APOA1'	0.683714
'F13A1'	0.604201
'TNN'	0.560544
'COL11A1'	0.541095
'SFRP1'	0.530008
'SPARCL1'	0.530002
'CHIA'	0.461204
'ADAMTS1'	0.449182
'S100A4'	0.434507
'ZNF366'	0.417395
'GRIA2'	0.405437
'INHBA'	0.378378
'MYH11'	0.375927
'MBP'	0.368055
'LOC100521659'	0.359666
'WIF1'	0.359448
'UACA'	0.34446
'S100B'	0.343674
'TPM1'	0.343518
'TNC'	0.343268
'BAZ1B'	0.342493
'RECK'	0.34129
'FMO2'	0.340075
'CEP290'	0.336853
'RARRES1'	0.333391
'HPSE2'	0.331947
'LOC100158001'	0.331471
'FGF7'	0.329394
'CLU'	0.328726
'CHL1'	0.325534
'SCN9A'	0.324877
'CTGF'	0.321006
'LAMC3'	0.319429
'ISG15'	0.317177
'CHD9'	0.313945
'PDE3A'	0.313417
'TPM2'	0.312834
'PPIG'	0.312326
'CCDC88A'	0.311653
'RRAD'	0.30762
'PLCB4'	0.306822
'CPXM2'	0.306353
'MFAP1'	0.305826
'HSPA6'	0.30574
'SPAG9'	0.304883
'C3'	0.303977
'S100A6'	0.303915
'CCDC80'	0.303174
'DDR2'	0.30251
'PCDH7'	0.301341
'CTSB'	0.299904
'NKTR'	0.298737
'DPT'	0.297978
'LOC100625479'	0.297391
'BAZ2B'	0.296958
'TRPS1'	0.296178
'POSTN'	0.295031
'UPF2'	0.293961
'ARCN1'	0.293233
'SBSPON'	0.293056
'CCL19'	0.291812
'IFI6'	0.290731
'LOC110255312'	0.290336
'MAP1B'	0.290325
'FN1'	0.289602
'GOLGB1'	0.288998
'COL23A1'	0.288983
'S100A2'	0.288009
'BPTF'	0.286526
'KRT8'	0.285487
'ARHGAP24'	0.284558
'SND1'	0.284344
'PENK'	0.283497
'GLUL'	0.281405
'PRPF4B'	0.280326
'AEBP1'	0.279631
'PLCB1'	0.279599
'SPEN'	0.27958
'SVIL'	0.27719
'SEMA3C'	0.276947
'CRYAB'	0.276823
'TPR'	0.276538
'PLCD3'	0.275173
'CNTN1'	0.271699
'TCP11'	0.271183
'NES'	0.270536
'STMN1'	0.270341
'MYLK'	0.270182
'NDNF'	0.269803
'DPEP1'	0.269067
'LIMCH1'	0.26868
'SLK'	0.267808
'ATP2B1'	0.267405
'GADD45G'	0.267072
'COL6A6'	0.266641
'FAP'	0.266615
'CSMD1'	0.265749
'PTGES'	0.265701
'F2RL2'	0.264681
'COL8A2'	0.264513
'MYOC'	0.264466
'KRT5'	0.263434
'CHD2'	0.263124
'CGNL1'	0.263001
'AK5'	0.262644
'NIN'	0.262229
'ITGA8'	0.262182
'ITSN1'	0.262177
'UGDH'	0.261912
'SMC4'	0.261152
'TM4SF1'	0.260512
'DHX36'	0.258795
'PRSS23'	0.258708
'LTBP2'	0.258365
'VCAN'	0.257063
'PHIP'	0.256987
'SMC1A'	0.256697
'XG'	0.255691
'ELN'	0.255185
'SYNE2'	0.254402
'GIGYF2'	0.254174
'GOLGA4'	0.252243
'ACER3'	0.251907
'C17H8orf4'	0.251407
'MYH10'	0.251401
'MAML2'	0.251146
'CLIP1'	0.251035
'BICC1'	0.250952
'CDC5L'	0.250853
'ARID4A'	0.250091

## Sheet: SH-vs-Abdomen
Gene Symbol	log2fc (CH_SH / CH_Abdomen)
'ADORA2A'	-0.365688
'WIF1'	-0.253511
'COL23A1'	-0.297019
'FAM13B'	-0.254349
'TXNRD1'	-0.255765
'EFEMP1'	-0.257825
'ACKR4'	-0.258503
'OMD'	-0.260792
'REV3L'	-0.262006
'PTGES'	-0.262885
'MYO5A'	-0.263737
'SMC4'	-0.264317
'GOLGB1'	-0.266439
'COL21A1'	-0.268405
'MAML2'	-0.273091
'CRYAB'	-0.277312
'IFI6'	-0.279745
'APOD'	-0.285138
'LRRC43'	-0.285429
'ADAMTS4'	-0.288445
'C1QTNF3'	-0.295854
'SPARCL1'	-0.309227
'ARID4A'	-0.328487
'ADAMTS17'	-0.332648
'PRKG1'	-0.357248
'FRMD3'	-0.358437
'FGL2'	0.260014
'POSTN'	-0.292372
'ENOX1'	-0.387394
'METTL8'	-0.394393
'STMN2'	-0.463025
'IGFBP6'	-0.580907
'DDAH1'	-0.591303

## Sheet: SH-vs-Head
Gene Symbol	log2fc (CH_SH / CH_Head)
'CTGF'	0.352196
'TNFAIP3'	0.326822
'HSPA6'	0.32344
'GOLGB1'	0.310454
'PDK4'	0.303833
'THBS1'	0.290962
'BAZ1A'	0.258977
'BIRC3'	0.255837
'ADM'	0.252542
'NKTR'	0.252056
'COCH'	0.695788
'MPZ'	0.644361
'TNN'	0.637851
'COL11A1'	0.580978
'SFRP1'	0.548943
'COL6A5'	0.393713
'IGFBP2'	0.377234
'DPT'	0.367505
'FABP4'	0.349345
'DDX46'	0.343613
'CLU'	0.335487
'POSTN'	0.33305
'APOA1'	0.332417
'FAM129A'	0.327592
'TNC'	0.319864
'DBI'	0.318278
'CLMP'	0.312954
'PRSS23'	0.308261
'ABCA6'	0.304391
'GOLGA4'	0.302119
'TPR'	0.292317
'OGN'	0.288163
'CNTN1'	0.287163
'ITSN2'	0.285368
'NCMAP'	0.284816
'MATN2'	0.284056
'GFRA1'	0.282453
'LOC100519808'	0.279303
'PCDH9'	0.275456
'FMNL2'	0.274721
'ASPN'	0.274191
'FAM13B'	0.273605
'CFAP161'	0.271986
'TNFAIP6'	0.270835
'CD55'	0.269028
'PTN'	0.268717
'HSPD1'	0.263591
'SMC6'	0.260401
'FBN1'	0.257491
'BDP1'	0.257001
'APLF'	0.25619
'IL17RD'	0.254318
'LIMCH1'	0.25343
'UPF2'	0.252976
'ITGBL1'	0.250119
'PTX3'	0.462419
'MGP'	0.357345
'BAZ1B'	0.335526
'PI15'	0.305644
'C3'	0.296019
'ACKR4'	0.295741
'MYO1B'	0.290513
'HMCN1'	0.289178
'NIN'	0.281844
'TRIP11'	0.277948
'CEP290'	0.276498
'DCLK1'	0.273136
'gene-C4BPA-2'	0.272289
'DDR2'	0.268371
'C17H8orf4'	0.266482
'CXCL2'	0.26639
'UGDH'	0.265114
'PTGS2'	0.264232
'LOC100521659'	0.26342
'COL12A1'	0.262444
'IFNAR2'	0.260986
'ITSN1'	0.260923
'S1PR1'	0.260166
'BICC1'	0.252304
'CCDC88A'	0.251232
'MYH10'	0.251228
'SPARCL1'	0.61515
'F13A1'	0.524927
'STMN2'	0.487652
'BPTF'	0.399717
'CCL2'	0.397906
'PHIP'	0.389084
'TNFSF10'	0.388318
'BOD1L1'	0.383998
'HLF'	0.37966
'UACA'	0.377947
'MAP1B'	0.371403
'HPGD'	0.368286
'PHACTR2'	0.367104
'LOC100520512'	0.366389
'FRMD3'	0.35845
'CIR1'	0.353451
'GHR'	0.353295
'CCL19'	0.345584
'SLU7'	0.344351
'COLEC12'	0.34262
'AKAP9'	0.339587
'AKAP12'	0.328503
'LOC110256043'	0.327926
'THOC2'	0.323136
'RBBP6'	0.322672
'ARID4A'	0.321337
'ADAMTSL3'	0.320004
'RAD50'	0.319593
'SLA-DQA1'	0.318235
'NSRP1'	0.314226
'CHD9'	0.312651
'FAM198B'	0.312329
'PRKG1'	0.311616
'RFC1'	0.310076
'SLK'	0.308334
'CDC5L'	0.303473
'LOC100520216'	0.302761
'DKK2'	0.302491
'CEP350'	0.301095
'CTSH'	0.300935
'DUSP6'	0.298574
'TPM3'	0.296791
'PPIG'	0.294513
'FAM111A'	0.294173
'ZNF385D'	0.289973
'PHF3'	0.286445
'NDNF'	0.285518
'APCDD1'	0.285272
'PRPF4B'	0.284463
'APOE'	0.282269
'ICAM1'	0.281913
'FAM102B'	0.278087
'SYNE2'	0.277462
'MFAP1'	0.275748
'FILIP1L'	0.27517
'MYO5A'	0.275012
'ESF1'	0.270801
'ETV1'	0.268632
'RBBP8'	0.267939
'BBS9'	0.267864
'ZNF366'	0.266057
'ATP2B1'	0.26556
'MCC'	0.265032
'IWS1'	0.2644
'EIF4G3'	0.2639
'LONRF3'	0.263266
'KIAA1551'	0.260229
'MAML2'	0.254639
'NEMF'	0.254547
'C4A'	0.252306
'TTC3'	0.251919
'BBX'	0.25162
'LRRN4CL'	0.2509
'ARCN1'	0.250782

## Sheet: SH-vs-Ear
Gene Symbol	log2fc (CH_SH / CH_Ear)
'DKK2'	-0.278511
'SERPINE1'	-0.291128
'ADORA2A'	-0.293447
'SUPT7L'	-0.325609
'WIF1'	-0.435884
'CLEC3B'	-0.262916
'EFEMP1'	-0.27202
'CCDC80'	-0.274603
'MGP'	-0.315633
'FMO2'	-0.332505
'MEDAG'	-0.250614
'GALNT15'	-0.25189
'PPL'	-0.254361
'ACKR4'	-0.255676
'ADGRD1'	-0.256388
'GNG2'	-0.256865
'SND1'	-0.25767
'ADAMTSL1'	-0.263432
'ITSN1'	-0.266386
'TPM3'	-0.26686
'PLCD3'	-0.267559
'ACKR1'	-0.267733
'NTRK2'	-0.267895
'DAPK1'	-0.269252
'FAM102B'	-0.276539
'ATRX'	-0.27665
'ROR1'	-0.278656
'PCDH9'	-0.278668
'SH3BP5'	-0.281718
'C7H14orf132'	-0.284429
'PPP3R1'	-0.286057
'FMO1'	-0.286575
'TAOK3'	-0.28678
'THOC2'	-0.28723
'MYO1F'	-0.288623
'MAML2'	-0.29026
'ANXA8'	-0.290371
'SYNE2'	-0.290476
'RFX2'	-0.29844
'F2RL2'	-0.29985
'S100B'	-0.301
'PDPN'	-0.302903
'PPIG'	-0.305934
'IGFBP6'	-0.312877
'PTN'	-0.315559
'CCDC88A'	-0.315634
'REV3L'	-0.316185
'CEP290'	-0.322729
'XYLT1'	-0.337192
'gene-FOLR1'	-0.347766
'TPPP3'	-0.349027
'MAP1B'	-0.353576
'CHD9'	-0.355742
'COL6A6'	-0.379398
'COL6A5'	-0.515296
'DDAH1'	-0.254673

## Sheet: SH-vs-Leg
Gene Symbol	log2fc (CH_SH / CH_Leg)
'HSPA6'	0.38184
'CTGF'	0.347295
'PDK4'	0.278134
'C3'	0.375342
'COL6A5'	0.368624
'PTX3'	0.313442
'PTGDS'	0.357128
'AKAP12'	0.357105
'MYH10'	0.351607
'F3'	0.330793
'BOD1L1'	0.330027
'FST'	0.31965
'TTC3'	0.310827
'AKAP9'	0.30413
'NSRP1'	0.300106
'THOC2'	0.297369
'THBS1'	0.296216
'CCL2'	0.290551
'CHRDL1'	0.290201
'ADM'	0.285438
'SFRP4'	0.285395
'TMEM100'	0.283928
'PHIP'	0.279206
'GFPT2'	0.278198
'ITGBL1'	0.276555
'PCDH9'	0.275729
'NIN'	0.2737
'NKTR'	0.269533
'MAP1B'	0.269449
'CIR1'	0.269207
'GOLGB1'	0.268592
'PTGFR'	0.268042
'BPTF'	0.26716
'C4A'	0.263423
'SVEP1'	0.259184
'COCH'	0.835067
'SFRP1'	0.51957
'COL11A1'	0.489317
'SERPINE1'	0.409079
'TNN'	0.387396
'DPT'	0.351192
'APOA1'	0.327576
'DAB2'	0.323782
'PPIG'	0.318897
'IGFBP2'	0.317664
'CXCL12'	0.308135
'SPARCL1'	0.30623
'IGF2'	0.305988
'PRSS23'	0.299375
'OGN'	0.297936
'CFH'	0.295174
'ABCA6'	0.281794
'NTRK2'	0.278543
'GOLGA4'	0.271736
'TNFSF10'	0.268614
'FMOD'	0.262005
'FAM102B'	0.259242
'CWF19L2'	0.259041
'CFAP161'	0.25887
'PHF3'	0.254977
'TPM2'	0.254036
'APLF'	0.253141
'DECR1'	0.252925
'MME'	0.25202
'TNC'	0.250315

## Sheet: Head-vs-Abdomen
Gene Symbol	log2fc (CH_Head / CH_Abdomen)
'ADGRV1'	-0.272947
'WIF1'	-0.256312
'SPARCL1'	0.342422
'STMN1'	0.264999
'MRC2'	-0.254235
'FMN1'	-0.255972
'PDPN'	-0.265192
'KERA'	-0.273819
'GREM1'	-0.275055
'MGP'	-0.277131
'TFPI2'	-0.286491
'ACKR4'	-0.302504
'THBS1'	-0.303447
'OMD'	-0.303672
'ADORA2A'	-0.355195
'C1QTNF3'	-0.276726
'MYO5A'	-0.261383
'APOD'	-0.291929
'PHACTR2'	-0.260834
'PRKG1'	-0.33634
'EFEMP1'	-0.2515
'HPGD'	-0.291465
'PCOLCE2'	-0.280011
'POSTN'	-0.335029
'STMN2'	-0.438114
'METTL8'	-0.445595
'THSD4'	-0.277384

[truncated: 5 more sheets: Head-vs-Ear, Head-vs-Leg, Leg-vs-Abdomen, Leg-vs-Ear, Ear-vs-Abdomen]
