# Supplementary material for: A single-cell transcriptome atlas of pig skin characterizes anatomical positional heterogeneity
Source: eLife. 2023 Jun 5;12:e86504. doi: 10.7554/eLife.86504 (PMC10241519; doi:10.7554/eLife.86504)
Supplement: Figure 6—source data 1. [file elife-86504-fig6-data1.xlsx]

## Sheet: Marker genes
Figure 6C—Source data
Marker genes of all clusters in back skin of Chenghua and Large White pig
Gene Symbol	0 cluster （log2fc）	1 cluster（log2fc）	2 cluster（log2fc）	3 cluster（log2fc）	4 cluster（log2fc）	5 cluster（log2fc）	6 cluster（log2fc）	7 cluster（log2fc）	8 cluster（log2fc）	9 cluster（log2fc）	10 cluster（log2fc）	11 cluster（log2fc）	12 cluster（log2fc）	13 cluster（log2fc）	14 cluster（log2fc）	15 cluster（log2fc）	16 cluster（log2fc）	17 cluster（log2fc）	18 cluster（log2fc）
'SPARCL1'		0.749317								1.58051					1.76294
'ITGB8'																			0.431527
'ACKR4'								0.746716	1.03649					0.298422
'SLA-1'	0.762357			0.522249	1.10246
'DAB1'													1.02844
'SLA-DQB1'	1.12019			0.50448	1.28524													2.42189
'CHI3L2'																			0.560916
'CTSB'				0.463598					0.990302					0.799912			0.2823	2.02975
'SELENOP'								1.39307	1.42149			0.549278		1.58819
'TMSB10'	0.636522			0.478134	0.624119			0.423664									0.68649	0.668423
'TPM1'		1.12746	0.302615			0.370982	0.324847			1.33521					1.419
'LGALS3'					0.329367			0.99762	1.49344			0.527654		1.56776					0.29472
'HSPH1'	0.263833				0.311446												0.41193	1.30865
'BTG2'	0.377179	0.521458			0.96181					0.565436						0.420863	0.397542
'RNASEL'							0.453859
'CDH1'																			0.888726
'GPNMB'									0.593555			0.430183		0.28997				0.464351
'SRGN'					0.667068													3.38813
'EMP1'	0.841675				1.34148	0.342356
'COL6A3'								1.64891	1.5204			1.06707		1.31808
'COL6A2'								1.07929	1.29482			0.795372		1.63542
'IGFBP6'								1.60883	0.254094			0.996061		0.894625
'IFIH1'	0.547559			0.264244	0.693021											0.482389		0.368923
'STC1'				0.333132	0.385961											0.314303
'TES'	0.519833				0.287245
'SELPLG'																		0.309102
'UBB'	0.8325				1.21421
'ANGPTL2'								0.939141	0.497112			0.436038
'CERS6'													0.351167
'CYP27A1'									0.380759			0.432424
'PTGIS'								0.594236				0.541731		0.502132
'LOC100127131'		0.593433								1.15442									0.53526
'RDH10'																	0.320868
'FOXP2'								0.303521					0.496715
'IFITM1'	0.854901			0.434	1.17045
'ABCC9'			0.410874			0.624481	1.05973				0.502042
'SLA-DRA'	1.06271			0.586332	1.33135													2.26385
'EFNB2'					0.345451											0.594103
'TSHZ2'													0.38099				0.761346
'H2AFZ'	0.890576				0.780377													0.599754
'RARRES2'								1.15752	1.21467			0.513299		1.21191
'NCF2'																		0.858393
'PHEROC'																			3.05282
'CHRM3'													0.700512
'SLCO2A1'				0.383246												0.269971
'EGFL8'												0.384047
'DOK5'													0.312376
'CYBRD1'								1.5209	1.14985			0.446069		0.819259
'IRF4'																		0.631937
'SFRP4'								0.580441							0.91852
'ISG15'	1.11894				1.48659
'NHSL2'													0.301523
'WBP1L'															0.295575
'VAV3'													0.395764				0.672509	0.711171	0.649912
'CEP250'																			0.489987
'TMOD4'																	0.383599
'GBP1'	0.924932				1.00043											0.438513
'PCDH15'													0.993633
'MOXD1'																			0.375027
'COL3A1'								2.61018	2.04001					0.676437
'KRT8'																			0.502617
'ISLR'								0.596163	0.259267			0.294299		0.419702
'PENK'									0.294276			0.276592			1.53256
'SLC8A3'													0.25361
'CTGF'								0.511794	0.340869	0.433771		0.572972
'DLL4'	0.54568				1.03892											0.444775
'FRMD5'													0.511721
'NHS'													0.410281	0.374978
'GALK2'													0.270869						0.276419
'PAK5'													0.71584
'CCDC186'														0.267808					0.494064
'SMC4'					0.250659
'CD53'																		2.11769
'POSTN'								2.88409	1.59494			1.0343		1.24268
'SPG20'														0.280566			0.27568
'SULF1'					0.277761		0.391191
'CCDC88C'					0.25593											0.394273
'PBX3'													0.320954
'MYB'																			0.279599
'FGF12'													0.73893
'C1H15orf48'					0.342553													0.311951
'GFRA1'												0.459578		0.351493					0.42668
'AKAP12'			0.820695					0.270098									0.746417
'LUM'								2.08828	1.87896			0.919082		1.67233
'PRKCH'	0.466349			0.893953	0.250797											1.24345	0.803798
'S100A2'																			0.775426
'TBX3'	0.328422				0.298439
'TTLL11'													0.25831
'RIMKLB'		0.433953
'SPDEF'																			0.591956
'IFIT1'	0.325473				0.861395
'CTSS'	0.38294			0.524628	0.340082												0.367984	1.72133
'GRID1'													0.605655
'GBP2'					0.364691
'LOC100153163'																		0.400419
'PSAP'	0.591714			0.338322	1.37626													0.687168
'KHDRBS2'													0.693456
'ARID4A'																0.363161
'MAGI3'													0.310503			0.718714		0.294057	0.288253
'WDR72'													0.305115
'CSF2RB'	0.368956				0.331864													1.73549
'MAP2'													0.38702
'MPHOSPH10'																		0.342414
'CD83'																		2.27462
'PRUNE2'															0.563785
'SLA-DRB1'	0.761418			0.656735	0.94619													2.33738
'SLA-DQA1'	1.24251			0.43906	1.34188											0.64432		2.54987
'LCN2'					0.360651														0.27983
'F13A1'									2.72062					1.64145
'TUBB2B'						0.25184	0.350022											0.321065
'CPXM2'									0.614178			0.847249		0.803359
'ANKRD37'																		0.287115
'LANCL1'								0.332573											0.281538
'PDZD8'					0.407724
'PHACTR1'													0.636304			0.337213		1.97825
'SLC30A4'					0.514745
'MEDAG'								1.30218	0.521161					0.628252
'DDAH1'												0.341717
'DDIT4'				0.707737				1.00161	0.466899								0.786598	0.991183
'MALT1'																		0.293099
'S100A14'								0.393495						0.367355					1.24646
'NES'						0.476388	0.704661				0.385726
'THBS2'								1.21572	1.78778			0.957808		0.39542
'PARP14'	0.39702				0.368371											0.301871
'BCAS2'		1.82369					0.321227
'LOC100154053'																		1.51227
'SOX17'	0.77711				0.99388											0.414841
'ST18'													0.46554
'PSAT1'								0.918095
'NEDD9'	0.750472				1.0083											1.01046
'DDR2'			0.467518											0.791522
'NCEH1'								0.357777
'BICC1'									0.523089			0.557389	0.526313	0.423088
'KIAA1324'																			0.741937
'PHEX'													0.370855
'RNF20'																			0.490463
'PRDM1'	0.514165	0.285655			0.323234	0.283041												0.627915
'RUFY2'		0.392234								0.393766
'SOD2'	0.384242					0.440368												0.83191
'NOV'			0.378251							0.960659							0.517097
'LAMA2'									1.56925			1.66726	0.306945	1.80708
'ACKR1'				2.8798
'CYYR1'	0.92907			1.14345	0.923895											0.333465
'TRIP11'								0.318258
'TM2D2'														0.314216
'MYZAP'					0.27695												0.566291
'ATP13A5'													0.310973						0.400812
'CLIC5'	0.721046			0.405174	0.56155											0.623987
'S1PR3'		1.07931								0.735802
'ABI3BP'								1.18776	0.914696					1.4275
'PLPPR1'													0.551051
'RAI2'													0.353896
'PANK1'							0.298756
'SCAPER'												0.292755	0.557228
'ANK3'													0.461348						0.452017
'ADIRF'		1.0613								1.94121					1.31273
'SCG3'																	2.06912
'CNTLN'													0.259446				0.287026
'SERTM1'				0.933957
'RALGAPA2'													0.365215			0.903512	0.593596		0.624909
'RRBP1'								1.3478	1.19614			0.55243		0.518827
'CEP78'																		0.37067
'PI16'								1.34217	0.769366			0.439416		0.262671
'RNLS'													0.686874
'CFAP100'																			0.284658
'PTPRE'	0.724353															1.06237	0.383904	0.672424
'FAM25A'																			0.320278
'SERPINB1'																		1.46157
'ADGB'													0.289993					0.363433
'PIK3AP1'													0.503853				0.419105	1.25322
'AKAP6'													0.870998
'TMED3'								1.56889	0.724063
'CHIA'																			2.26488
'FBLN5'									0.642266			0.620224		0.556005
'ESF1'																	0.320033		0.330904
'HS3ST5'													0.380905
'SUFU'													0.272091			0.313129
'IFIT2'	0.269922
'PLBD1'																		0.375123
'DMXL2'		0.326019								0.376683								0.294279
'LTB'																	0.518798
'ANO6'					0.825532											0.443138
'SVEP1'								0.533597	0.855014			0.274542		0.308269
'LRRC23'																0.690963
'MAP3K9'																		0.258585
'SPAG17'													0.412135
'CEP290'																			0.400405
'SERPINB5'																			0.396285
'TSC22D1'	0.4639				1.20258											0.298819
'MMRN2'	0.729127			1.37561	0.915578											0.441527
'LOC100156073'	0.938861			0.86289	0.782429											0.714502	0.973131
'SLA'																		1.73228
'PTPRB'	0.671499			1.15075	0.766158											0.984144
'HPGD'									0.655161					0.633765				0.893094
'SHTN1'																			0.658685
'DACH1'													0.416408			0.664516
'LCP1'																		1.67576
'NHSL1'													0.324443				0.332398
'PAPSS2'																			0.935538
'GREM1'									0.523333					0.558765
'S100A4'						0.899696			1.81645			0.587491		1.0996	0.480708		0.432531	0.281703
'TANK'																		0.727537	0.261285
'CDH7'													0.42329
'SYTL3'																		0.363677
'GRK3'																		0.557373
'UNC5D'													0.702927
'PCOLCE2'								1.2385	0.741735			0.268351		0.953228
'NEMF'																			0.434473
'SLK'																			0.362226
'RBP1'									0.328135					0.262695
'COL12A1'								1.91983	0.998441			0.732903
'HDC'																		0.488298
'CHD8'																			0.42512
'DSP'																			1.54387
'STMN2'									0.296813					0.82365
'CASP7'	0.378896				0.952822
'PDZRN4'													0.495932
'PRIM2'													0.340612
'BCL2A1'																		2.83502
'FAM46A'								0.857903	0.818087			0.379776		0.617311
'BTBD9'													0.570849			0.288137		0.566896
'OLFM3'													0.335871
'TRAF3'																0.723966		0.433808
'GOLGA4'								0.753322	0.634735			0.480025		0.467888					0.951597
'FILIP1L'		0.314469	0.37589				0.344098			0.291434
'IMPG1'													0.258595
'IL1RAPL2'											0.305542		1.05274				0.284446
'ATRNL1'													0.655193
'ZNF704'													0.342709						0.833119
'PNP'	0.501954																	1.34817
'DUSP5'	0.683796			0.403852	0.552224											0.53134	0.279503	0.854958
'KCNQ3'													0.376288
'TRPM3'													0.860259
'SLC46A2'																		0.356655
'CHST11'																0.633265
'DPP10'													0.749911
'COL13A1'												0.285339	0.351987
'LOXL4'								0.580475	0.7236					0.426538
'IGSF1'													0.600133
'ADAM12'													0.386248
'ADAMTSL3'													0.493714	0.511914
'DMTN'																	0.262471
'CADM3'								0.617861	0.802588			0.438967		1.19012
'ADAMTS4'		1.11415	0.609566			1.02427	0.986855				0.405992
'PRPF4B'		0.525777			0.279967											0.320858		0.315075	0.297509
'MTMR3'																			0.370248
'SAMSN1'																		1.18616
'DNAH10'													0.266465
'APOD'						1.08246						1.57063		2.34924
'JMJD1C'	0.265577				0.565009											0.768094	0.296115	0.487836
'ZDBF2'																			0.343731
'PCDH17'	0.785103			0.597435	0.414848											1.05766	0.669664
'NIN'						0.264066												0.374816
'STON2'													0.301663				0.871344
'CPNE4'													0.70011
'GALNT15'					0.432466							0.27532
'RIMS1'													0.513199
'ZRANB3'													0.56905
'SEMA3G'					1.79997
'ANK1'													0.289797
'IGF2BP2'					0.30407								0.369461			0.31367	0.300775
'SIPA1L1'													0.409427
'TRPM6'					0.470286								0.361455			0.380849
'GJA5'					0.668499										0.381737
'TRAM2'													0.252398
'MTUS2'													0.556474
'SGCZ'											0.289967		1.09572
'KERA'								2.33236	1.17909
'NKAIN3'													0.560558
'HEY1'					0.869791
'BCR'	0.455952				0.824325											0.473777	0.368229
'HPSE2'											0.292607	0.362915	0.973254	0.591918
'NT5E'								0.703157	1.06739
'LOC100158001'																			2.05273
'SPOCK2'					1.30692
'PCNX2'													0.32409
'CPA6'													0.540965
'COL14A1'								1.75625	2.2617			0.971667		0.973061
'TSTD1'																			0.932886
'ARHGAP30'																		0.731778
'SBNO1'																		0.449217
'GALNT7'																			0.622223
'PI15'								0.334167	0.479296					0.406622
'FLRT3'																			0.344196
'CRISP3'																			0.272257
'PROX1'																	1.62303
'CRABP1'								0.257154	1.00364			1.2964		0.617155
'IFI30'								0.791402	0.807506					0.400081				1.31182
'HAS1'		0.30637
'SLC9A3R2'	0.428094				1.10084
'CWF19L2'	0.307291			0.269447	0.46021
'UTP3'		0.265615
'NPSR1'													0.507842
'LCK'	0.650491			0.407462												0.988992
'TCAP'		0.323915								1.08606					0.286361
'KCNMB2'													0.293597
'IL7R'																		0.672437
'THY1'								1.39299	1.30074			0.632909		1.09448
'SLC38A4'																	0.57638
'PDK4'	0.26786				0.669439			0.703339
'TNFAIP6'						0.314143		1.2937	0.3899					0.261451
'UBD'	0.532189				0.717196
'PEBP4'								0.859198	0.51757
'ELOVL6'													0.257744						1.05762
'TMOD1'		0.260355													0.360835
'RRM2'																		0.300049
'ZFPM2'													0.601405				0.611848
'ADAP2'						0.382182	0.461139
'PLAC1'													0.343218
'SPATA16'													0.404552
'SPATA17'													0.406808
'CMYA5'													0.29888
'NEXN'										0.652128					0.963435		0.664726
'HCN1'													0.451063
'TACSTD2'																			0.870996
'FKBP10'								1.20416	1.05068			0.304403		0.301388
'HOMER1'	0.319087				0.313464											0.919296	0.69278
'PARP8'																		0.346541
'GABBR2'													0.487651
'GXYLT2'								0.339624	0.369423					0.649024
'PTPRZ1'													0.265206
'SLAMF1'																		0.482162
'CIR1'								0.286574	0.375447			0.286602		0.470483					0.329763
'TTF1'																	0.281534
'RASGRP3'	0.288759															0.408276	0.812848
'VWA8'													0.686265						0.256673
'C9H11orf87'													0.717507
'MME'												0.364971	0.296803	0.408523			0.380162
'LOC100511545'																0.328952
'S1PR2'									0.341518					0.291075				0.427384
'KRT5'																			1.7869
'GRIK3'													0.259265
'MSR1'																		0.506927
'ASPN'			0.404349				0.28182	0.978266
'DNAH2'																		0.396799
'CHL1'									0.282451			0.363543	0.316309	0.807871					0.473687
'RAPGEF4'	0.374796			0.414941									0.359638			1.09428	0.288352
'CFAP61'													0.467144
'HSPA8'	0.706228				1.06782												0.725187	0.851741
'NXPH1'													0.368969
'RCAN1'	0.469394				0.542897	0.64705										0.28202	0.585139	0.487828
'OMD'								2.82749	1.51028
'LOC100511937'					0.390233											0.453617
'CWC27'													0.267821
'DNAJA1'	0.624097				0.953392													0.807241
'EFEMP1'			0.351382					0.802173						1.45041
'PHF14'																	0.336744
'NEDD4L'													0.506894			0.474462	0.338757	0.280109
'TBC1D2'					0.400766													0.659349
'ACSS3'														0.294871			0.254157
'N4BP2'																			0.504245
'DOCK10'													0.417759					0.824044
'CPXM1'								1.24677	1.10431			0.361082		0.423151
'PODXL'	0.683547				0.960076											0.533272	0.379657
'MFAP5'								2.40817	0.882511
'PPFIA2'													0.487602
'CNTN6'													0.462942
'TMEM163'													0.354652
'KCND2'								0.300834					0.654417
'GCC2'								0.302272						0.275873					0.664495
'CLMP'								0.90981	0.901521			0.571903		0.821829
'SHROOM3'													0.731226
'SOX4'							0.44516										1.1244		0.780984
'PIK3C2B'																0.35035	0.288476
'MGAT5'	0.262203			0.318883	0.423247								0.290948			0.657727	0.629304		0.310246
'ARHGEF9'													0.57118			0.356385
'LPAR1'								0.547868	0.645142			0.27458		0.573874
'CCDC129'													0.261219
'OLFM2'						0.342976					0.268761
'WIF1'									0.450638			0.265134
'ITGA8'		0.421827								0.691955		0.347472
'MEIS2'													0.348533	0.277955
'PPL'									0.669576			0.293445		0.736792
'TENM3'											0.528585		1.64727
'LMO2'	0.434348				0.870781												0.895174
'NUCB2'								1.32191	0.766119			0.302741		0.284838
'SDK1'								0.447187	0.409049			0.269936	0.449485
'C3H2orf40'																	1.43109
'ESRP1'																			0.698642
'JAML'																		1.46129
'SCIN'					1.59327
'THBS4'												0.304484
'MRPL1'																			0.333742
'BNC2'				0.33543									0.442377
'TENM2'											0.556211		1.49563
'ODF2L'													0.550084						0.389527
'PTX3'						0.317671			0.481972					0.573855			2.21066
'RHOH'																		1.23959
'SGTB'										0.329056					0.287615
'CNKSR3'				0.428493												0.891948	1.73571
'AGMO'													0.394947
'IL17RD'				0.426273								0.441852
'IQUB'													0.271393
'PERP'																			1.27226
'MARCH3'				0.387281												0.948701
'FHL2'															0.267234			0.402769
'ETV1'												0.270101		0.379646
'C2H11orf49'													0.347971
'PRRG4'																		0.643131	0.286303
'RBM47'													0.264868					0.417338	0.475266
'SDCBP2'									0.28619
'NCKAP5'											0.405004		0.800827						0.452246
'LOC100513809'													0.261214
'SHROOM4'	0.508776			0.56522	0.578086											0.582844
'GALNT16'								0.383313
'LOC100514068'																		0.38534
'SMPDL3B'																		0.596466
'XYLT1'								0.330663	0.329956		0.319166		0.264612					0.730932
'GRIP1'													0.7457
'LOC100514323'																	0.542076
'ARHGAP23'																0.759341	0.278571
'C1H9orf135'													0.2629
'CCDC88A'									0.308302			0.34599		0.421729				1.09503
'STAC2'																			1.41749
'FLNB'	0.421916				0.941453											1.12921			0.681206
'KCTD1'													0.356858				0.299862		0.544895
'DNAJC2'																			0.412592
'FILIP1'		0.381488			0.522996					0.548291						0.6364
'PIK3C2A'	0.501024			0.601878	0.566578											0.608095
'MAST4'					0.736429								0.466854			0.783428
'LOC100514786'													0.337375			0.352445
'PLPPR5'													0.616548
'LRP1'								1.43025	1.24346			0.688838		0.989256
'KIF6'			0.823855			0.304584					0.620746
'C1H6orf183'													0.314685
'AHCYL2'								0.255523					0.376816					0.254171
'FRAS1'													0.536252
'ADGRG1'	0.946024			0.702081	1.10308											0.801185
'LIMCH1'								0.337615	0.532876			0.624222	0.578944	0.442616			0.610394
'MYCT1'	0.55946			0.320078	0.529727
'INSC'													0.454322
'ABLIM3'	0.589425				0.532724											0.534273
'SPINT2'				0.336911	0.297358														1.65565
'TANC2'													0.488941				0.600747	0.399383
'SLC25A21'													0.75534
'TSPAN33'																		0.702441	0.549016
'DTNB'																		0.275731
'MYO3A'													0.47134
'KRT19'																			1.2806
'ATP8A1'																		0.291732
'MPPED2'													0.382716
'FAM198B'									0.480888					0.746414
'FLT3'																		0.584386
'FRMPD4'													0.860646					0.563023
'KRT15'																			1.30643
'LOC100515559'													0.581986
'NCAM1'								0.328723	0.558501			0.335443	0.521713	0.5914
'KIRREL3'													0.533502
'HTRA1'								1.28531	1.78077			1.23798		1.40133
'ARHGEF28'													0.539368
'DHX34'																	0.715344
'RNF128'													0.2732						0.561688
'SEPT6'								0.260789										0.419504
'CTSL'																		0.545371	0.711026
'KCNJ6'													0.557023
'CDK14'									0.337108			0.320286	0.443907	0.4692
'COL6A5'			0.250588			0.432568			0.454006					1.94277
'GMFG'																		0.644386
'CLIC2'	0.59819			0.407482	0.740788													0.25184
'EDIL3'													0.404159
'APLF'														0.529085			0.265825
'DAPK1'													0.258797				1.58571
'MRC2'								1.39571	1.08657			0.539501		0.641736
'CEP162'														0.257838
'SYNJ2'									0.253376			0.255324
'GPC3'			0.609556			0.797104					0.291884	0.356673		1.10137
'LRRC7'													0.772908
'PLEK'																		1.77083
'DPT'								0.810007	1.28239			0.53754		1.98654
'GRAP2'																		0.433341
'RCN1'								2.05539	1.516
'KCNIP4'													1.40237
'GRIK2'													0.9048
'NTN4'														0.357414
'MEOX1'	0.284047			1.09594
'CCDC80'								2.81886	1.63147					1.03417
'PLCB4'									0.299958				0.643759			0.53052
'ZCCHC6'									0.256624			0.363399						0.634281	0.518054
'COL6A6'												0.508276		0.368293
'C10H1orf115'	0.745365			0.373802	0.361463
'SCN9A'									0.336147				0.333054	0.36693
'GRID2'											0.313755		1.03258
'CFI'																			0.267835
'MMRN1'																	2.71912
'SPON1'								0.951957	1.55002			0.733173		1.13407
'FAM129A'								1.17117	0.440439	0.561314		0.266864						1.30998
'CAVIN2'	0.587928				0.927131												1.72425
'PKIB'																		0.936349
'CSF1R'																		1.62147
'LOC100517129'	0.460165			0.353713	0.327725											0.360687
'ALDH1A1'																			0.817768
'C9H11orf97'																			0.277538
'TFEC'													0.300878					0.485989
'SV2C'													0.406458
'STK4'																		0.978586
'LOC100517408'													0.266859
'CTTNBP2'													0.625651
'CD226'													0.260028
'SMC6'												0.267229		0.332901				0.452777	0.377285
'SLC9A9'													0.781915	0.275889			0.391165
'ROBO2'									0.453492		0.343122	0.534081	1.40582	0.712731
'BDP1'																	0.344992	0.351278
'SLC14A2'													0.507424
'LONRF3'									0.37611
'FAM13B'																		0.484677
'SH3BP5'				1.66529														0.47972
'SBSPON'										0.328878
'LPCAT2'					0.720277											0.254705
'PLXDC1'								1.30334	0.842968			0.275923		0.43335
'APC'														0.263139			0.399054
'CTNND2'											0.374761		1.16579
'M1AP'													0.261708
'ZNF804B'													0.556485
'SRD5A1'					0.291363														1.51546
'FLT4'																	1.10879
'PUS7'					0.399215
'SLC39A11'																			0.466937
'MAFB'								0.358484	0.526859			0.585606		0.642556				1.55203
'MECOM'	0.393485			0.407895	1.07405								0.485296			1.2232
'LRP4'														0.418852
'GIMAP4'																		0.40689
'RCN3'								1.31634	0.909587					0.345543
'GIMAP6'																		0.830575
'GFPT2'								1.26982	0.385131					0.554284
'GJA1'	0.903206				0.746287			0.395749
'IL33'				1.14139	1.13836
'FMNL2'												0.379847	0.470469	0.388207			0.332809	0.340042
'SQSTM1'	0.323917				0.571248												0.417983	1.94323
'GALNTL6'											0.402562		1.36749
'LEO1'																	0.297353
'CCDC18'																			0.358542
'TRIB3'								0.787675
'RIPK2'					0.252941
'EDA'													0.469263
'CA10'													1.01777
'KSR2'													0.305584
'MAP1B'			0.518274					0.363876
'NRXN1'											0.257438		1.10356				0.363126
'LOC100519098'	0.422717			0.271369	0.518439											0.284789
'KIAA1217'													0.417449			0.592781
'SLC16A14'	0.499825			0.377962
'NTRK2'								0.719634	0.739208			0.907524	0.405187	1.23429
'ENTHD1'													0.296535
'TGFBI'								1.68309	0.321085									0.450331
'F2RL2'									1.50989			1.60926		2.58776
'CNTN5'											0.370523	0.303155	1.30484
'DOCK3'													0.494328
'CLEC1A'	0.479682			0.301197												0.41796
'PLXNC1'								0.685532				0.336				0.364882		0.722655	0.755219
'TTN'													0.382879				0.388381
'NTM'													0.991465						0.359641
'ZNF366'				0.268842								0.313663	0.367937	0.448981
'SLC41A2'								0.650789	0.526613
'RECK'									0.859833					0.290481
'AZGP1'																			0.427334
'MERTK'					0.261912											0.255466
'CAPG'								0.686188	1.0676					0.582656
'DKK2'			0.302291						0.656423			1.08568		0.742684
'KCNT2'													0.467835
'TOX3'				0.278483
'FAM167B'	1.05802			0.921042												0.316147
'C6H1orf141'													0.313989
'DAB2'								0.768674	0.489003			0.265086		0.82384				0.689887
'RAD51B'											0.258353		0.735968						0.334639
'CRYAB'		0.695355	0.270751						0.262001	1.06158					0.682562
'TBC1D20'					1.18442											0.256614
'LOC100519808'								0.506858	0.482341			0.529216
'FAM102B'								0.497595	0.90721			0.445964		0.783814				0.28081
'OSBPL6'													0.277174				0.305787
'IDO1'																		0.268393
'LOXHD1'													0.44125
'ADGRV1'													0.69807
'TPRG1'													0.433334
'ADRA1B'													0.595572
'GTF2A1L'													0.323333
'COL22A1'													0.260377
'LOC100519997'								0.616024	0.337336
'PCDH7'													0.464832	0.641505
'HS3ST4'													0.619047
'FYB'																		0.766358
'TFPI2'			0.421441				1.16862	0.475827	0.422307			0.510782		0.861544
'LRRN3'	0.381756
'PAX5'													0.260542
'BTBD11'		0.32725									0.264483		0.307496
'VAT1L'																	0.882714
'P3H2'							0.654574												0.687288
'ARRDC3'	0.452753				0.815044											0.30942
'LOC100520241'													0.577888
'GALNT13'											0.285383		0.740644
'CRADD'													0.257607					0.351875
'DCLK2'													0.262725				0.554592
'N4BP1'	0.562866			0.436979	0.496249											0.539071		0.340288
'ZNF385D'								0.483458	0.277959			0.323468	0.935385	0.515555
'MAP1A'								0.479964	0.373543			0.535577		0.401523
'LOC100520491'																		1.62102
'PHLDB3'																			0.341178
'TPR'														0.357366					0.499427
'LOC100520512'									0.720051					1.15098
'ACOXL'													0.567791
'PREX2'					0.710394								0.442639			0.894608
'ROR1'												0.278467	0.568822	0.354979
'KLHL1'													0.532953
'ACTG2'										0.831589					1.59318
'KIF21A'																			0.333357
'PRSS23'	0.438432									0.274841							0.562967
'DOCK4'				0.348226									0.665033			1.03796	0.567324	0.37317
'NELL1'											0.286022		0.971535
'CCDC173'																			0.281579
'ARHGAP15'													0.638678					0.43051
'CLEC2B'	0.802474			0.577145	1.43963											0.791634
'ABCA6'									0.377163			0.834429		1.14715
'STX3'																		0.377113
'EPB41L3'								0.335427					0.267062					0.573039
'NOS1'													0.252851
'HLTF'																	0.291078
'NLGN1'											0.276539		1.11492
'CHRDL1'								2.09829
'NAV2'													0.740122			0.793668
'UBASH3B'													0.254077					0.857758
'PLCD3'								0.267382	0.543819					0.414134
'PNPO'								0.319947
'KYNU'													0.255544					0.354565	1.57399
'CRYBG1'					0.283095													0.942638
'IQGAP2'									0.410479			0.922902		1.10757					0.865576
'SNAPC1'	0.327949				0.503554											0.397595		0.987737
'SWAP70'	0.346523				0.957631											0.40084		0.629484
'ZC3H13'																	0.393071		0.497412
'ADAMTS2'								1.13183	0.734622			0.260539
'SKAP1'													0.503747
'TSPAN8'													0.452524
'CNTN1'								0.528409	0.744991			0.837139	0.368773	0.431363
'ARAP2'						0.464229												0.290669
'F2R'									1.11173			1.28096		1.85243
'ADHFE1'																			0.3437
'RASSF5'																		0.999059
'LOC100521647'																0.284247
'LVRN'									0.539687			0.299265		0.746028
'LOC100521659'						1.36321			0.405986					0.335675
'PIKFYVE'																		0.766077
'MAPK10'													0.308194						0.495378
'SND1'								0.686938	0.781529			0.403747		0.474092
'COL23A1'									0.439032			0.257586	0.585367
'NCMAP'												0.715238
'SIAE'																			0.32916
'PAH'																			0.832088
'GRM3'													0.430058
'HCLS1'																		0.583853
'BRINP2'																			0.255909
'TM4SF1'	0.292834	0.267029	0.346134		0.598277					0.738934
'HAVCR2'																		0.323343
'NIPAL2'					0.302774
'RELL1'		0.348063			0.748013					0.267426
'BASP1'														0.271802				0.972483
'CYLC1'													0.328079
'GNG11'	0.938481			0.473177	0.77752												0.6109
'SYT16'													0.46294
'NEBL'					0.636237								0.28654			0.545212		0.537618	0.531808
'HS3ST2'													0.289384
'REEP1'													0.289531				0.684664
'NWD2'													0.273184
'ARHGAP24'								0.662783	0.458629				0.782655
'DUSP1'	0.54535			0.84493	0.787176			0.303369	0.540248								1.07063	0.407336
'MCTP1'	0.287447				0.743928								0.546738			1.13067
'PEG3'												0.359589
'AHNAK2'														0.25204
'PLXDC2'								0.703699	0.667865			0.290317		1.00836
'AFF3'								0.363564					0.705536				0.366885		0.703664
'PTPRC'																		1.58044
'GPR183'																		3.13148
'RAD50'								0.338048				0.27831
'FAM19A1'													0.67007
'RASGRP1'																		0.304988
'DNAH14'													0.388455
'ID1'	0.51704			0.250019	0.645791					0.462584							1.13481
'RBFOX1'											0.409778		1.51695
'CCDC148'													0.494202
'ADAMTS5'			0.468533
'UNC80'													0.580873
'TBC1D4'													0.480426				0.366888	0.56901
'MALRD1'											0.283493		1.04834
'CFAP47'																			0.483037
'ZNF638'								0.29835						0.316139
'COL7A1'												0.538767							0.56575
'MMP27'								1.33227	0.851634					0.37967
'LNX1'													0.400698
'NKTR'								0.319933	0.277321			0.508999		0.309188			0.271056		0.606764
'OSBPL3'					0.410846								0.337585			0.51808			0.457173
'UACA'		0.564322								0.564721
'CDH12'													0.901549
'TMEM100'					0.687263									0.674886
'GRIK4'													0.400455
'GNPTAB'	0.254444				0.259944								0.318033			0.450568		0.684536	0.56892
'RHOBTB3'									0.323306			0.370683		0.524022
'COL21A1'									0.735651					0.543755
'CNGB3'													0.293552
'NR5A2'	0.409529															0.371608
'BAZ2B'					0.268717									0.359322		0.490275			0.752451
'PRR5L'													0.311287
'PIK3C2G'													0.402746						0.523276
'ASTN2'											0.271541		0.923432
'SEMA3D'								0.30098	0.287172								1.26178
'LMO7'													0.406686						0.61858
'SMC1A'														0.282392					0.265691
'ZNF827'													0.281794
'DYNC1I1'													0.631988
'UTP20'																			0.62396
'SEMA3E'								0.499042	0.370378				0.405716
'CACNB2'											0.352655		0.690181
'GRM8'													0.676201
'SLC25A13'													0.251138
'KIAA1191'																	0.820031
'SCARA5'								0.387275	1.28818			0.316052		1.01449
'PHACTR2'	0.293607				0.590721												0.411849
'NXPE2'																			1.1477
'THSD4'											0.387615		0.567186				0.333405
'TMEM254'																			0.525885
'PTPRO'													0.362518
'PCLO'													0.531995
'SYNE2'	0.42624			0.737711	0.941409											0.807088			0.340014
'LOC100524794'													0.521473
'FGD2'																		0.432072
'ADAMTS3'													0.286644
'PEX5L'													0.28592
'GRIA4'								0.751739	0.400855				0.407361	0.288596
'C16H5orf34'																	0.270706		0.272903
'HTR2C'													0.381527
'FAM111A'	0.385965			0.517951	0.698053									0.69599
'ERBB3'																			0.37905
'NDST3'													0.358963
'BANK1'													0.380677					0.594955
'REL'		0.758367			0.253438												0.483689	1.71842
'HGF'			0.590535				0.751523
'CCDC7'													0.451761
'FAM114A1'								0.946595	0.748864					0.390375
'GLYATL2'																			0.578316
'LOX'								1.75797	1.0524			0.299217		0.38281
'BOD1L1'																			0.446713
'DYNLT3'					0.664579
'CTNNA2'											0.295623		1.32693
'FAM46C'								0.775575	0.329603									1.00782	0.285651
'LOC100525346'	0.253725				0.36133		0.333775
'ADGRL4'	0.628374			0.715812	0.516022
'LOC100525396'						1.00477	0.955739											1.34907
'BPTF'																0.286904	0.328732
'SRBD1'													0.305403
'ITGBL1'								2.15357	1.84745			0.347874		0.974421
'LOC100525542'													0.296319
'ARHGAP18'																	0.731415	0.443778	0.407284
'DPY19L1'					0.356785
'COL8A2'												0.577835							0.410091
'ENOX1'											0.327431		0.949338
'AOX2'								0.439821					0.362917
'ENOX2'													0.369774
'BBS9'												0.299805	0.646644	0.254282			0.280657		0.312729
'ERBB4'											0.32379		1.19769						0.333206
'NELL2'													0.350633
'LRRTM4'											0.294501		0.959587
'SNRPG'																			0.286594
'FMO2'									0.599448					2.12113
'FAM198A'								0.959178	0.420711
'LOC100526059'													0.567301
'EHF'																		0.316535	1.27035
'KIAA1211L'													0.269754					0.565673	0.298384
'SNX24'													0.284275
'FMOD'								0.618496				0.883514
'NRXN3'											0.359313		1.17568
'NYAP2'													0.497217
'PLXNA4'															0.359955
'C1H9orf84'													0.269568
'CSF2RA'																		1.12368
'RGS6'													0.490243
'CLEC3B'	0.464681			0.648945				1.76029	1.20041								0.393467
'GOLGB1'								0.454717	0.350711					0.392968					0.920836
'BACH2'													0.558703					0.541446	0.258053
'DNAH11'													0.44948
'LXN'	0.681567			0.409466
'SLIT2'								0.522736	0.647605			0.348078		0.69507
'RARRES1'								0.629948	1.47176			0.777239		1.88811
'HS6ST3'													0.764938
'ZNF385B'													0.523955
'LRRN4CL'								0.485335	0.755454			0.445113		0.62455			0.551437
'STXBP5L'													0.435972
'ANKRD44'													0.625143					0.364976
'GDA'													0.294608
'MROH9'													0.282276
'ADGRF2'	1.37602			0.257162	1.17904											1.04155
'MDGA2'											0.255516		0.830855				0.686497
'NPAS3'											0.29005		0.867351
'GRM7'													0.967347
'DUT'																			0.271994
'IL1RAPL1'											0.381887		1.44248
'S1PR1'	0.731225			0.485149	0.99798											0.49192	0.432099
'UNC5C'													0.568338
'SLC2A9'										0.600576
'CGNL1'								0.39728	0.534524					0.550465			0.612132		0.738077
'COL4A3'													0.286485
'RBBP8'																			0.263694
'MYO3B'													0.585538
'XKR4'													0.479022
'SFRP1'									0.271829			1.59285
'ENPP3'							0.253033											0.604081
'C14H10orf10'	0.562856			0.461861	1.04071
'CCDC149'																			0.498006
'FMN2'													0.499618
'ESRRG'													0.833558
'EMB'																			0.796888
'GPR158'													0.428703
'FAM19A2'													0.599278
'PIBF1'													0.399421
'PLD5'													0.591432
'TTC36'																			0.703016
'C3H16orf62'													0.286471
'PIK3CB'													0.395191						0.365844
'BIRC3'	0.51292				1.06167											0.393623		1.36286
'LOC100622606'													0.470132
'NRP2'																0.259786	1.04507	0.359734
'PHACTR4'					0.431925											0.387811
'DUSP2'																		0.96783
'ARCN1'								0.39486	0.807601					0.565614
'LINGO2'											0.289212		1.3094
'NAV3'													0.770369
'GRIA2'									0.473605			0.271045		0.500677
'DUSP6'	0.677725			0.454761	0.535546												0.604707
'ZC3H12B'													0.902989
'CHPF'								1.53135	0.519375
'TMEM132D'											0.275275		1.03274
'EMR4'																		0.532389
'RXFP1'													0.389044
'SLC7A11'																		1.22895
'SYNPR'													0.471674				0.436025
'RRAD'		0.865771	0.42296							0.921136					1.27677
'TMEM132C'												0.347001	0.549669
'SEMA7A'	0.521474				1.54223											0.421192
'NOL8'														0.323306					0.274069
'DSC3'																			0.333518
'S100B'					1.37233							0.795755					0.266828
'PTPRT'											0.279496		1.03021				0.287253
'LOC100623720'						0.331434		0.923217	1.42132			0.798808		1.53705
'P4HA2'								1.18547	1.08249					0.590522
'DCLK1'									0.92976				0.450063
'SYNM'		0.69103								1.58166					1.48372		0.540684		0.2544
'SLC12A8'													0.292769
'KCNH7'													0.572853
'PSD3'									0.374358				0.500849
'VWA3B'													0.354225
'LRP1B'											0.464467		1.50064
'FAT3'													0.886996
'LOC100624191'																		0.803139
'LAPTM5'																	1.07261	1.9764
'DYNC2H1'													0.455966	0.256719
'LOC100624226'	0.88375			0.602102	0.928133											1.40235	0.558108
'MAP3K7CL'		0.675391								0.328247
'TCEA3'								0.614683	0.628536					0.590824
'TMTC1'													0.386123				0.840765
'SEMA3C'								1.55858	0.424743			0.280738
'MARK1'		0.32014								0.365291
'TSPAN13'	0.676442				1.11899
'SERINC5'	0.250722															0.662499	0.543591
'CEP83'						0.291372
'RNF150'													0.325135
'STX19'																			0.290544
'PTPRM'	0.429763			0.759316	0.500326								0.431771			1.62762	0.675607
'THSD7B'											0.284659		1.13852
'SLC24A3'													0.561014
'SCN3A'																	0.899295
'RETREG1'									0.364749
'BRINP1'													0.287921
'CCDC14'		0.620349								0.621621
'ST8SIA1'														0.255378
'GABRG3'											0.253191		0.754626
'CSMD1'											0.346271		1.21054
'ERG'	1.04296			0.8713	0.948361											0.983176	0.654191
'LOC100625479'												1.12935		0.373379					0.518518
'VPS13C'								0.441947	0.388733			0.347469		0.417425
'TTC6'													0.524866						0.388383
'CDH18'											0.333385		1.02992
'C3AR1'																		0.490368
'SGK1'	0.816873				0.454302											0.451669	0.801649	1.38182
'CDH8'													0.915676
'ARNTL2'													0.315947
'DDX27'																		0.400237
'HDAC8'													0.339739
'GRAMD2B'		0.661013				0.265046
'BST1'					0.625747												0.549853
'RASSF10'																	0.423496
'MFSD4A'					0.379254
'CTNNAL1'					1.19617												1.05307
'SYN2'													0.2864
'TIPARP'					0.31214		0.358582											1.04534
'HIVEP3'													0.324221					0.326999
'CADM2'											0.286252		0.928267
'APCDD1'									1.15995			0.84162		0.954938
'LOC100626318'				0.503827													0.290111
'NPR3'					0.421394
'USP53'					0.719625											0.254806
'DCHS2'													0.420576
'KCNH8'													0.519843
'PIEZO2'								0.364694									0.43669
'COL1A2'								3.01568	1.69629
'FOXJ3'																	0.367536
'GTF2F2'																	0.296225
'BHLHE41'												0.255921		0.25688				0.800285	0.276083
'ID3'	0.389892	0.633577								0.847177							0.527781
'MACC1'													0.399076
'DLGAP1'													1.11862				1.33169
'ABL2'																		0.489902
'TRAF1'	0.279786				0.415151											0.364812		0.576282
'ARL5B'		0.564428			0.774074		0.299534									0.327611
'PTPRD'											0.611489		1.46042
'PDGFRA'									1.07779			0.804386		1.46162
'RELN'													0.648707				1.21527
'PLCH1'													0.372893						0.262193
'ARSK'								0.274982
'TTC29'													0.434054
'FBXO24'								2.1954	1.38781					0.558176
'FAM208A'					0.456637
'HUNK'													0.28689
'SYTL2'			1.19597												0.606442
'BTNL9'	1.1702				0.291289											0.293075
'GALNT5'								0.611252	0.30821
'RAB7B'						0.32772												0.523494
'CYTIP'																		0.974537
'PER3'							0.412733
'DTNA'											0.270443		0.590672		0.384356
'MYH11'		1.5857								1.95482					2.13626
'MREG'																		0.55011
'C17H8orf4'	0.335547	0.309734				0.784047	0.3058
'IL1R2'																		1.57574
'ELN'								0.350121	1.44914			0.824649		0.49136
'SCN3B'																	0.55742
'DHCR24'								0.324575	0.305207					0.250672
'FAP'									0.982004			0.372765		0.979925
'PDGFRL'								2.31956	1.33934					0.571557
'ADGRB3'													0.953979
'TNFSF9'																		0.887641
'RPH3A'													0.448959
'ATP13A3'					0.656846											0.322378
'GALR1'														0.315507
'LOC100737113'																			1.0373
'IPCEF1'																		0.262653
'WDR60'																			0.285
'ASTN1'													0.383842
'ACKR2'																	0.88511
'ITSN1'								0.438886	0.421706			0.373689		0.464307
'GPC5'											0.30691		1.31344
'CNTNAP2'											0.365806		1.40714
'COL16A1'								0.819145	1.2965			1.35056		0.376925
'FAM180A'								1.29245	1.77267			0.663695		0.317703
'RND1'	0.558841			0.320455	0.537833												0.29168
'LRRC17'								1.35681	0.836876					0.536848
'EYA1'													0.468464
'RUNX2'													0.339795					0.636467
'GAREM1'													0.331809
'DIAPH3'													0.634554
'NECAB1'													0.571815
'C5H12orf56'													0.34436
'DNASE1L3'																	0.734443	0.524977
'CHD5'								0.626087	0.467144			0.324496
'COL1A1'								3.06482	1.79671			0.29894
'ANO1'						0.651098	0.299942
'CRB1'													0.382853
'ENPP4'					0.564093													0.482697
'PDPN'								0.539087	0.928304			0.331908		0.791787			1.32007
'OPCML'											0.296542		1.05034
'LPAR6'	0.849712				0.622901											0.553705
'CCSER1'				0.319678	0.346049								1.01004			1.18374		0.730936
'FSTL5'											0.295468		0.966612
'TMEM178A'													0.280931
'SAMD12'													0.541059						0.416108
'ZNF536'													0.623986
'FAM222B'																0.336333
'PPP1R9A'													0.45475				0.575812
'GPM6A'													0.306791				1.74088
'NDNF'									0.607504			0.500015		0.577955
'UST'									0.273506				0.388913					0.398227
'C2CD4B'	1.12887			0.821065	0.96327											0.375241	0.559988
'TCHP'																	0.259939
'PDE11A'													0.479645
'SCFD2'													0.609925						0.438236
'DDX10'																			0.299154
'ARHGEF33'													0.291519
'LOC100739101'																			0.479216
'RORB'													0.359154				0.341223
'RALYL'													0.834244
'SUCNR1'																		0.319721
'FAM219A'													0.251008			0.315131
'NALCN'													0.461975
'CEP112'					0.338971								0.556367			0.563751
'LOC100739673'																			1.64521
'THSD7A'													0.54519
'APBA2'													0.26292
'COL24A1'													0.269562
'WNK2'													0.309153
'LOC102158035'													0.400142
'PPM1H'													0.418266						0.540747
'LOC102158411'																		0.263793
'EYS'											0.268574		1.21394
'RSPH6A'							0.499131
'FXYD6'				0.321505	1.15277													0.318803
'GPC6'											0.250919		1.1415
'FAM155A'													0.799325
'MACROD2'											0.355254		1.50395			0.299016	0.305789
'FMN1'													0.605755
'ACTR3B'					0.535038											0.312976
'FHIT'											0.306779		1.2899
'PPP2R3A'								0.331717					0.48804
'MGAM'													0.346477					0.369641
'ADAMTSL1'											0.341535		1.03902
'ADAMTS17'									0.314559				0.53317
'CFAP54'													0.317686
'LOC102161418'	0.54713			0.745949	1.12485
'CCDC178'													0.591974
'MYO16'													0.739294
'PDE1C'						0.468551	0.318017				0.439759		0.565042
'GRM5'													0.575781
'TDRD12'												0.382285
'C8H4orf17'													0.404455
'SPAG16'											0.272823		1.12875
'CHP2'	0.296772			0.513317	0.873575												0.762183
'TNN'												1.34427
'HCAR2'																			0.761052
'LOC102164422'													0.504825
'DACH2'													0.748618
'NRG1'											0.295877		1.10268
'RIMS2'													0.640383						0.299676
'DENND5B'													0.269167
'LOC102165485'													0.295015					0.6278
'AK9'													0.286712
'JAM2'	0.657461			0.769407	0.589829
'DPH6'													0.632363
'HMCN1'									0.48254			0.394144	0.470896
'COLEC12'									0.82222			0.381202	0.280082	1.09273				0.533819
'ECM2'			0.523613					1.10204	0.761642					0.633332
'LOC102166944'				0.253251															0.278439
'MTMR12'																	0.398458
'MDFIC2'													0.320731
'SH3RF2'			0.252949	0.586536
'TMIGD3'																		0.603421
'S100A1'												0.345068							1.0472
'FNIP2'																		0.859797
'CADM1'												0.279969	0.390441			0.433237		0.459906
'PCDH9'									0.279972			0.425776	0.906346	0.849086
'TTC3'								0.624917	0.492709			0.591323		0.536144					0.563033
'LOC106506082'											0.255927		0.915988
'LOC106506202'													0.606353
'PACRG'													0.586289
'WDPCP'													0.524741
'NEGR1'													0.92066	0.91667
'LOC106508546'								0.626898				0.426812	0.805328	0.318363
'LRRC4C'											0.392945		1.189
'SHISA9'													0.315827
'OGN'								1.98815	0.45214			0.286439		0.556008
'LOC106510097'				0.513053
'SBSN'																		0.559141
'LOC110255205'				0.647132													0.483618
'BDKRB2'	0.487323				0.471694											0.291712
'LOC110255272'																			0.628545
'LOC110255312'																			1.74863
'LOC110255360'	0.285652				0.395365											0.358482
'LOC110255652'																0.419962		0.695617
'LMOD1'		0.351461	0.372457							1.37995					1.67043
'POLG2'																0.466691
'LOC110256043'			1.02581				0.336654							0.45607
'LOC110256340'																		0.532277
'PCP4'																			0.366622
'LOC110256592'													0.453655
'TBX1'																	1.21229
'SH3BP4'																			0.350062
'FAM168B'																		0.34619
'IWS1'																			0.403719
'GIMAP1'																		3.20981
'LOC110257749'													0.667466
'LOC110257797'													0.304604
'PLVAP'	1.07621			1.65888
'SPC24'															0.285173		0.478418
'CD320'	0.730734				0.838304
'NUPR1'								1.88599	1.31973			0.375843					0.768803
'PLEKHF2'																		0.642503	0.331033
'APOLD1'	0.457802				0.891723		0.353354									0.420347
'RASSF9'				0.376371													0.710199
'TANGO6'				0.794631									0.323301
'ABCC11'																			0.539593
'IFI6'	0.771239				0.823987									0.503961
'LOC110261352'													0.52345						0.612243
'LOC110261483'																	0.270859
'FAM189A1'													0.485223
'LOC110261944'													0.290241
'CPZ'								2.17833	1.42198
'PDE3A'		0.433065					0.327091			0.311586	0.490777		0.391373
'KCNJ3'													0.274896
'PLA2G7'									1.02841					0.415815
'CCL5'																		1.77484
'SSTR3'									0.466344
'IRF8'																	0.310779	0.986178
'HSP70.2'					0.40928				0.557771			0.536721		0.491579			1.29495	1.25702
'CD74'	1.12765			0.82174	1.28074											0.340967		1.86674
'CCR7'																		1.5752
'F3'															0.281966				1.38973
'TXNRD1'		0.473645				0.340303	0.318587											0.306814
'TPM2'		0.687965	0.500788							1.60511					2.31723
'LAMB1'								0.655672	1.4472			1.02286		1.63596			0.371787
'DES'			0.273037				0.393787								1.85774
'ANGPT2'			0.573772			0.488674	0.326461				0.264356						1.32452
'GGTA1P'	0.303474				0.827815												0.703449	0.465476
'DNAJB1'	0.309204			0.260333	0.769042												0.769204	1.24697	0.338716
'CD55'									0.846524			0.439412		0.763657
'RSAD2'	0.342169				0.502802
'INSR'	0.286463			0.277459												0.296945
'gene-FOLR1'								1.43826										1.23036
'ITIH4'		1.12681								1.72316					1.09472
'IL2RA'		0.79454				0.810803	0.706851				0.355754
'PIK3R5'																		0.63453
'FOLR2'								1.56631	0.964029			0.393633		0.40122
'RYR2'		0.329803									0.483138		0.610402				1.23538
'TIMP1'		0.959854				0.96217												0.59731
'CFD'				0.443332				0.630722	1.36263			0.27926		1.88395				0.344062
'CXCL8'																		3.04374
'SLPI'	0.470948
'RYR3'													0.675158
'MYH10'								0.6203	0.480637			0.411168		0.590086			0.559596
'HSPA6'				0.266902				0.299166	0.345566								1.26721	1.50894
'AKAP9'								0.384848	0.468125			0.401716		0.433695			0.625204		0.910062
'CNN1'										0.786263					1.69001
'EDN1'				0.294777	1.30111
'IGF2'	0.906969			0.885376	1.3858											0.586714
'ACADL'																			0.653851
'PECAM1'	1.10071			1.85156	0.752152											0.305284	0.470075
'ITGB2'								0.260233										0.588843
'GLUL'					0.480393				0.945249			0.504721		0.980925			0.310135	0.433036
'SERPINE1'			0.336074
'DCN'								2.69141	1.93509			0.679694		1.33674
'CTSH'								1.40539	1.10036					0.443453				0.868245
'PLAU'			1.15091			0.841464	1.02871				0.318015
'TIMP2'								1.39171	1.17276					0.973416
'SMAD1'	0.614932				0.417967											0.475942	1.14351
'CLU'					0.925308							1.09586		1.30309					0.445686
'KCNN3'					0.345117								0.259072			0.739156
'MYOC'														1.99153
'IGFBP2'			0.433874		1.12933
'C3'									0.261674					1.96691					0.554644
'TNF'																		0.865648
'SPP1'																		0.417669
'INHBA'												0.746314
'IL1A'																		1.73619
'POU2F2'																		0.367525
'GP91-PHOX'																		0.394199
'TBXAS1'													0.391874					0.525814
'ARG1'																		0.514311
'PLAT'				1.98061	0.641507											0.296484
'PTGFR'								0.940305						0.257748
'MX1'	0.299429				0.405444											0.316361
'HMGB2'																	0.573712	1.083
'FMO1'	0.329718			0.512626
'CBR1'																			1.82371
'KMO'																		0.29795
'SELP'				0.28875
'CD80'																		0.932335
'CALCRL'	0.719185			0.841648	0.482132											0.640552	0.809972
'COL11A1'												0.803196
'IL18R1'																		0.310848
'SLC31A1'																			0.250013
'DPEP1'								0.761422	0.731463			0.406938
'MGP'								2.03887	1.64613	0.836776		0.616058		1.37348
'PAPPA'			0.520556			0.260489
'PLK2'	0.888256			0.835036	1.29739											0.889999	0.523953
'STAT4'																		0.380229
'AIF1'																		0.858415
'PRDX5'																			0.406732
'C1S'									0.716509			0.402441		2.58628
'TFAM'																		0.355677
'FGF7'			0.804271									0.263454		0.44265
'ENTPD1'				0.262551	0.521452
'KDR'	0.70445															0.480956	0.525783
'VCAN'								1.00933	1.13437			0.907634		1.40275
'RGS1'																		3.34878
'F8'	0.26862			0.463285													1.32589
'MMP2'								1.08817	1.60534			0.989817		1.60967
'TGFB3'		1.50308				0.443085									0.354682
'PLIN2'							0.330127
'TYROBP'																		1.96788
'FCER1G'																		1.15702
'FXYD3'																			0.385833
'ACP5'																	0.276742	0.479415
'MT1A'																			0.759406
'CCL2'		0.384783	1.34437			0.832079	1.12738				0.524098
'KCNMA1'													0.834039						0.831415
'ESR1'													0.381463
'CD86'																		0.981696
'PTGDS'												0.830328		0.455372
'TNC'												1.15451
'GLRX'																		1.69174
'TGFA'																			0.404959
'IGF1'												0.893672		0.906177			0.637603	0.285514
'PRKAR2A'																		0.63645
'POU2F1'													0.335093			0.42243	0.257989
'SELE'				2.52632
'KITLG'	0.500057				0.538938											0.526464
'NTRK3'										0.321902			0.347934
'ANPEP'								1.05137	0.83435			0.81024		0.937154
'CFH'									0.495436					1.73067
'COL5A2'								1.76585	1.20592			0.404292		0.489857
'LPL'		0.279117				2.02222	0.782083				0.669184
'PTGS1'									0.347915									0.604384
'TSHR'													0.295
'HBEGF'	0.65889				0.262432													0.506255
'CTSK'								1.655	1.49482			0.713386		1.16924			0.318158
'HSPE1'																	0.497402		0.72909
'APOE'						0.70906		0.396252	0.76653			0.951551		2.70699
'PTGS2'						0.780123								0.310941				1.20194
'PTN'								0.90907	0.658474			0.698072		0.511357
'FN1'			0.666902			0.28343		1.04197	0.833994			0.483962		1.68668
'PLCZ1'													0.339614
'RGS5'		1.28209				1.289	0.988148				0.755791
'SAT1'	0.275051				0.975623													1.23816	0.347724
'LTF'																			0.465988
'ACTG1'	0.80116			0.311128	0.996348					0.341757					0.500732
'AREG'																		0.565535
'PPARG'							0.435378
'CILP'								0.30354	0.267248
'FCGR3A'																		2.36375
'APOA1'	1.03909				1.9288												0.50962
'IL6'			0.859861	0.91126		0.772914	0.623375
'LIF'																	0.436464	0.429657
'FABP4'	0.513367		1.22168	0.458012
'VWF'	0.677231			1.33209	0.579394											0.685756	0.622699
'CYP1A1'					0.451422
'EPCAM'																		0.653089	0.932297
'ST6GALNAC5'													0.271232
'HYAL2'	0.308129			1.02278	0.49736
'TNFSF10'	0.602272			0.663453	0.851839									0.489731			0.590706		0.378332
'AQP1'	1.15246			0.891607												0.322573
'MBP'												0.67245						0.66534	0.298448
'TPM3'	0.92986			0.826495	1.01013												0.250654	0.488043
'UPF3B'																			0.349815
'PCDH11X'											0.290813	0.255704	0.570266	0.600038
'CDH5'	0.745833			0.484024	0.891615											0.516028	0.397214
'FBN1'				0.308193				0.729598	0.634655			0.406136		0.863054
'MGAT4C'													0.757467
'CXCL2'		0.934087				0.956739	1.14317				0.399104
'MAOB'													0.287053
'COL17A1'																			0.802559
'LGALS1'			0.614567					0.864561	1.03409	0.411506		0.61012			1.39265
'FST'									0.636448			0.38831		0.345821
'MRC1'																	0.736847	1.1584
'C1R'								0.870835	0.951476			0.631372		2.27515
'C4A'														1.84339
'HMOX1'					0.299521
'HAPLN1'												0.412004
'DSTN'		1.15975								1.93604					1.49357
'PCSK2'													0.402068
'CCL21'																	0.816079
'FGL2'				0.46528	0.297927									1.62114			0.374074	0.940162
'C2'														0.990563
'CYP7A1'								0.811144	0.52317
'SCGB1D1'																			2.45218
'THBS1'					0.854953			0.333134	0.48805						0.256145	0.284778			0.532691
'CXCL10'				0.393605		0.398774
'LMCD1'	0.679652			0.479203	0.453053											0.514704
'CXCL12'	0.331164		0.424995		0.524993									0.869006
'STMN1'	0.2675				0.552924												0.894964
'CXCL14'									0.691202			1.16778		1.83136					0.956793
'ADAMTS1'		0.534864	0.515163				0.65491
'ENPP2'	0.704747				0.789416
'P2RY12'																		0.465419
'ADORA2A'	0.352525				1.12273											0.514338		0.626626
'TNFSF4'													0.642375
'CD274'																		0.452567
'FABP5'	0.989091			0.932872	1.04401											0.351757	0.420386
'ARL4A'				0.294812	0.338908												0.976581
'SPARC'								2.29931	1.64501			0.330345		0.4652
'ITM2A'	0.765816			0.788865	0.545586
'FCGR2B'																		0.882242
'PKD2'								0.375076				0.289629
'SNCA'												0.396068	0.310603
'ST8SIA4'	0.386912																	0.779854
'AKR1CL1'																			0.899322
'PTGES'									0.623972					0.924006
'PALMD'	0.742036			0.813236	0.535626											0.377738
'PEG10'							0.262959
'TMEFF2'													0.51316
'CLDN4'																			1.43013
'NTN1'																	0.636126		0.492542
'S100A6'								1.21641	0.809064	0.675393		0.650055		0.73886	1.12658
'ACTA2'			1.28472							1.59524					1.99753
'SFN'																			0.544234
'AEBP1'								2.05758	1.58067			0.439656		0.879573
'PRKG1'							0.436455				0.750207		1.04273
'RGS2'	0.685232			0.522502	1.13353													1.35669
'CST3'								1.4771	1.20549			0.524997		0.832169				2.35859
'PRKN'											0.260298		0.875015				0.25786
'AK5'												0.399106	0.46176
'CD36'	0.824939			0.768713			0.466424
'SERPINF1'								2.12005	1.49142			0.43452		0.907
'CCL26'				0.541338
