# Supplementary material for: A single-cell transcriptome atlas of pig skin characterizes anatomical positional heterogeneity
Source: eLife. 2023 Jun 5;12:e86504. doi: 10.7554/eLife.86504 (PMC10241519; doi:10.7554/eLife.86504)
Supplement: Figure 6—source data 2. [file elife-86504-fig6-data2.xlsx]

## Sheet: EC
Gene Symbol	log2fc ( CH-Back-vs-LW-Back)
'ABLIM3'	2.69759
'ACKR1'	3.44543
'ADORA2A'	3.50032
'ANO6'	3.22495
'APOE'	2.66556
'ATP13A3'	3.59129
'C14H10orf10'	4.26879
'CEP83'	2.77159
'CLEC1A'	2.76186
'CTSB'	2.659
'DSTN'	2.55743
'EFNB2'	2.74945
'ENPP2'	3.31972
'FOXJ3'	2.54436
'GBP1'	2.86373
'GNPTAB'	4.43627
'GOLGA4'	3.44269
'IL33'	3.43835
'INSR'	2.76497
'JAM2'	2.87615
'LMCD1'	2.56623
'LPCAT2'	2.88876
'LRRC23'	4.57705
'MAP1B'	3.20508
'MX1'	2.6229
'MYH10'	3.08138
'NR5A2'	2.51127
'PLAU'	3.05358
'RND1'	2.5214
'SELE'	5.18555
'TANGO6'	2.97964
'TBC1D20'	3.89445
'TRPM6'	2.93666

## Sheet: SMC
Gene Symbol	log2fc ( CH-Back-vs-LW-Back)
'PTGS2'	4.23144
'DMXL2'	3.98435
'NES'	3.93919
'RSPH6A'	3.75097
'SLC2A9'	3.7276
'BCAS2'	3.66214
'LPL'	3.64002
'CXCL10'	3.55563
'RGS5'	3.47833
'ACTA2'	3.43326
'CD36'	3.40706
'AKAP9'	3.36469
'NIN'	3.35726
'CLU'	3.32147
'PER3'	3.31899
'FILIP1L'	3.23705
'SYNE2'	3.23674
'TTC3'	3.20982
'PDE1C'	3.17353
'KIF6'	3.16521
'LAMA2'	3.13041
'SGK1'	3.11807
'GOLGB1'	3.11247
'CNOT10'	3.08285
'RGS2'	3.05391
'HSPA8'	3.03751
'NKTR'	3.02226
'APOE'	2.9747
'HGF'	2.97299
'FABP4'	2.95292
'UACA'	2.94368
'ASPN'	2.9407
'DDR2'	2.93048
'C17H8orf4'	2.87515
'BAZ1B'	2.85683
'SAT1'	2.79961
'FABP5'	2.79689
'TFPI2'	2.78766
'ECM2'	2.78484
'FAM129A'	2.7784
'PLIN2'	2.76207
'DTNB'	2.74022
'LOC100127131'	2.72884
'TPR'	2.72283
'CUL2'	2.70698
'PPARG'	2.68228
'AKAP12'	2.66541
'ADAP2'	2.66008
'FN1'	2.63553
'NOV'	2.60589
'S100A4'	2.60391
'LGALS3'	2.58873
'PLXDC2'	2.56936
'CLIP1'	2.52384

## Sheet: FB
Gene Symbol	log2fc ( CH-Back-vs-LW-Back)
'TNN'	8.49507
'CXCL14'	7.17861
'POSTN'	6.91447
'COL11A1'	5.28489
'NKTR'	4.87726
'IGF1'	4.61347
'DDAH1'	4.461
'CLU'	4.3999
'INHBA'	4.38036
'IGF2'	4.31569
'HTRA1'	4.30322
'DPEP1'	4.23172
'TMEM100'	4.17845
'APOE'	4.16557
'ARCN1'	4.16105
'COL6A3'	4.04147
'IGFBP2'	3.91887
'GALNT15'	3.87113
'SPARCL1'	3.84602
'APCDD1'	3.83881
'FBLN5'	3.81027
'VPS13C'	3.77662
'CIR1'	3.75686
'PCDH9'	3.74497
'FAM129A'	3.70617
'PTN'	3.69577
'CFD'	3.68643
'SOD2'	3.67401
'FAP'	3.67228
'COL1A1'	3.64602
'HSPA6'	3.64001
'GOLGA4'	3.59805
'PRPF4B'	3.54625
'STMN2'	3.54284
'FGF7'	3.52525
'PTGS2'	3.5128
'ITSN1'	3.51244
'PTGIS'	3.44344
'ABCA6'	3.40822
'DAB2'	3.40356
'CEP290'	3.39662
'ZCCHC6'	3.36655
'COL21A1'	3.36265
'DHX36'	3.34015
'SLK'	3.33813
'ZNF366'	3.33725
'TMF1'	3.32378
'CYP27A1'	3.30241
'GPC3'	3.26394
'TDRD12'	3.26152
'HAPLN1'	3.25247
'PKD2'	3.24959
'NEGR1'	3.22657
'TPM2'	3.19933
'IWS1'	3.19866
'CNTN1'	3.19406
'ANGPTL2'	3.18099
'DPT'	3.17581
'SND1'	3.16629
'SMC6'	3.16603
'ADORA2A'	3.16405
'BAZ1B'	3.1617
'ITGBL1'	3.15528
'SBNO1'	3.14383
'PLXDC2'	3.13209
'MAP1A'	3.13097
'TTC3'	3.12806
'TRIP11'	3.12472
'GOLGB1'	3.12273
'IL17RD'	3.12101
'BICC1'	3.11946
'BPTF'	3.08426
'FILIP1L'	3.04538
'GPNMB'	3.02461
'PDK4'	3.02227
'CCP110'	3.02216
'PTGDS'	2.98464
'NCAM1'	2.9791
'TIMP1'	2.97474
'FAM198B'	2.97417
'MGA'	2.95508
'TRIM44'	2.91741
'SH3BP5'	2.91215
'CLMP'	2.90923
'RECK'	2.87604
'SYNM'	2.87042
'BBS9'	2.87012
'NTN4'	2.86557
'THBS1'	2.85336
'ZNF385D'	2.85255
'ASTN1'	2.84245
'FBN1'	2.82396
'NIN'	2.81244
'PHF3'	2.80548
'CREB3'	2.80457
'CPXM1'	2.79861
'LIMCH1'	2.79379
'SLC27A2'	2.78514
'SCAPER'	2.78486
'ZNF638'	2.78446
'CD55'	2.78082
'COL23A1'	2.77898
'LOC100521659'	2.76904
'TPR'	2.76786
'DDR2'	2.76421
'CCDC186'	2.75357
'COL13A1'	2.74511
'BOD1L1'	2.74322
'NOL8'	2.73747
'LRRC17'	2.73421
'NEMF'	2.72492
'SMC1A'	2.71511
'PTX3'	2.70945
'PHF14'	2.70198
'AFF3'	2.69958
'LGR5'	2.69781
'gene-FOLR1'	2.67959
'APLF'	2.67439
'COLEC12'	2.6691
'FAM185A'	2.65593
'PI16'	2.65549
'MEIS2'	2.64276
'CEP350'	2.64075
'RHOBTB3'	2.62819
'PPP2R3A'	2.62611
'NUCB2'	2.61059
'FILIP1'	2.60816
'FOXJ3'	2.60427
'SERPINE1'	2.59521
'ROBO2'	2.59466
'ARID4A'	2.59244
'HPGD'	2.56339
'SEMA3G'	2.55876
'HMGB2'	2.54667
'PPL'	2.54639
'SUPT16H'	2.53336
'PHACTR2'	2.5188
'MYH10'	2.50048
'TM4SF1'	-2.99539
'CCL2'	-3.10205
'NGFR'	-3.13783
'RGS5'	-3.62613
