# Supplementary material for: A single-cell transcriptome atlas of pig skin characterizes anatomical positional heterogeneity
Source: eLife. 2023 Jun 5;12:e86504. doi: 10.7554/eLife.86504 (PMC10241519; doi:10.7554/eLife.86504)
Supplement: Figure 7—source data 1. [file elife-86504-fig7-data1.xlsx]

## Sheet: Cell communication
Figure 7A—Source data 1
source	target	ligand	receptor	prob	pval	interaction_name	interaction_name_2	pathway_name	annotation	evidence
SMC	FB	PDGFA	PDGFRA	0.00383901	0	PDGFA_PDGFRA	PDGFA - PDGFRA	PDGF	Secreted Signaling	PMID: 15207812
ESC	FB	PDGFA	PDGFRA	0.000574949	0	PDGFA_PDGFRA	PDGFA - PDGFRA	PDGF	Secreted Signaling	PMID: 15207812
SMC	SMC	PDGFA	PDGFRB	0.0077601	0	PDGFA_PDGFRB	PDGFA - PDGFRB	PDGF	Secreted Signaling	PMID: 15207812
SMC	FB	PDGFA	PDGFRB	0.00380069	0	PDGFA_PDGFRB	PDGFA - PDGFRB	PDGF	Secreted Signaling	PMID: 15207812
MDC	EC	VEGFA	FLT1	0.00623323	0	VEGFA_VEGFR1	VEGFA - VEGFR1	VEGF	Secreted Signaling	KEGG: hsa04370; PMID: 16633338
SMC	EC	CCL2	ACKR1	0.0590863	0	CCL2_ACKR1	CCL2 - ACKR1	CCL	Secreted Signaling	PMID: 26740381
FB	EC	CCL2	ACKR1	0.00340613	0	CCL2_ACKR1	CCL2 - ACKR1	CCL	Secreted Signaling	PMID: 26740381
EC	EC	CCL2	ACKR1	0.00411532	0	CCL2_ACKR1	CCL2 - ACKR1	CCL	Secreted Signaling	PMID: 26740381
MDC	EC	CCL2	ACKR1	0.00817901	0	CCL2_ACKR1	CCL2 - ACKR1	CCL	Secreted Signaling	PMID: 26740381
KE	EC	CCL2	ACKR1	0.00571478	0	CCL2_ACKR1	CCL2 - ACKR1	CCL	Secreted Signaling	PMID: 26740381
ESC	EC	CCL2	ACKR1	0.0183865	0	CCL2_ACKR1	CCL2 - ACKR1	CCL	Secreted Signaling	PMID: 26740381
MDC	EC	CCL5	ACKR1	0.0162818	0	CCL5_ACKR1	CCL5 - ACKR1	CCL	Secreted Signaling	PMID: 26740381
MDC	EC	CCL14	ACKR1	0.00545225	0	CCL14_ACKR1	CCL14 - ACKR1	CCL	Secreted Signaling	PMID: 26740381
SMC	EC	CXCL2	ACKR1	0.0661975	0	CXCL2_ACKR1	CXCL2 - ACKR1	CXCL	Secreted Signaling	PMID: 26740381
FB	EC	CXCL2	ACKR1	0.00677302	0	CXCL2_ACKR1	CXCL2 - ACKR1	CXCL	Secreted Signaling	PMID: 26740381
EC	EC	CXCL2	ACKR1	0.0582142	0	CXCL2_ACKR1	CXCL2 - ACKR1	CXCL	Secreted Signaling	PMID: 26740381
MDC	EC	CXCL2	ACKR1	0.0520712	0	CXCL2_ACKR1	CXCL2 - ACKR1	CXCL	Secreted Signaling	PMID: 26740381
TC	EC	CXCL2	ACKR1	0.00612074	0	CXCL2_ACKR1	CXCL2 - ACKR1	CXCL	Secreted Signaling	PMID: 26740381
KE	EC	CXCL2	ACKR1	0.0104802	0	CXCL2_ACKR1	CXCL2 - ACKR1	CXCL	Secreted Signaling	PMID: 26740381
ESC	EC	CXCL2	ACKR1	0.02628	0	CXCL2_ACKR1	CXCL2 - ACKR1	CXCL	Secreted Signaling	PMID: 26740381
MDC	EC	CXCL8	ACKR1	0.0261968	0	CXCL8_ACKR1	CXCL8 - ACKR1	CXCL	Secreted Signaling	PMID: 26740381
FB	TC	MIF	CD74_CXCR4	0.00555467	0	MIF_CD74_CXCR4	MIF - (CD74+CXCR4)	MIF	Secreted Signaling	PMID: 29637711; PMID: 24760155
EC	TC	MIF	CD74_CXCR4	0.00428274	0	MIF_CD74_CXCR4	MIF - (CD74+CXCR4)	MIF	Secreted Signaling	PMID: 29637711; PMID: 24760155
MDC	TC	MIF	CD74_CXCR4	0.00457131	0	MIF_CD74_CXCR4	MIF - (CD74+CXCR4)	MIF	Secreted Signaling	PMID: 29637711; PMID: 24760155
TC	TC	MIF	CD74_CXCR4	0.00457579	0	MIF_CD74_CXCR4	MIF - (CD74+CXCR4)	MIF	Secreted Signaling	PMID: 29637711; PMID: 24760155
KE	TC	MIF	CD74_CXCR4	0.00505431	0	MIF_CD74_CXCR4	MIF - (CD74+CXCR4)	MIF	Secreted Signaling	PMID: 29637711; PMID: 24760155
ESC	TC	MIF	CD74_CXCR4	0.00468274	0	MIF_CD74_CXCR4	MIF - (CD74+CXCR4)	MIF	Secreted Signaling	PMID: 29637711; PMID: 24760155
FB	MDC	MIF	CD74_CD44	0.0230115	0	MIF_CD74_CD44	MIF - (CD74+CD44)	MIF	Secreted Signaling	PMID: 29637711; PMID: 26175090
EC	MDC	MIF	CD74_CD44	0.0178139	0	MIF_CD74_CD44	MIF - (CD74+CD44)	MIF	Secreted Signaling	PMID: 29637711; PMID: 26175090
MDC	MDC	MIF	CD74_CD44	0.0189968	0	MIF_CD74_CD44	MIF - (CD74+CD44)	MIF	Secreted Signaling	PMID: 29637711; PMID: 26175090
TC	MDC	MIF	CD74_CD44	0.0190151	0	MIF_CD74_CD44	MIF - (CD74+CD44)	MIF	Secreted Signaling	PMID: 29637711; PMID: 26175090
KE	MDC	MIF	CD74_CD44	0.0209718	0	MIF_CD74_CD44	MIF - (CD74+CD44)	MIF	Secreted Signaling	PMID: 29637711; PMID: 26175090
ESC	MDC	MIF	CD74_CD44	0.0194529	0	MIF_CD74_CD44	MIF - (CD74+CD44)	MIF	Secreted Signaling	PMID: 29637711; PMID: 26175090
FB	TC	MIF	CD74_CD44	0.00577263	0	MIF_CD74_CD44	MIF - (CD74+CD44)	MIF	Secreted Signaling	PMID: 29637711; PMID: 26175090
EC	TC	MIF	CD74_CD44	0.00445101	0	MIF_CD74_CD44	MIF - (CD74+CD44)	MIF	Secreted Signaling	PMID: 29637711; PMID: 26175090
MDC	TC	MIF	CD74_CD44	0.00475087	0	MIF_CD74_CD44	MIF - (CD74+CD44)	MIF	Secreted Signaling	PMID: 29637711; PMID: 26175090
TC	TC	MIF	CD74_CD44	0.00475552	0	MIF_CD74_CD44	MIF - (CD74+CD44)	MIF	Secreted Signaling	PMID: 29637711; PMID: 26175090
KE	TC	MIF	CD74_CD44	0.00525274	0	MIF_CD74_CD44	MIF - (CD74+CD44)	MIF	Secreted Signaling	PMID: 29637711; PMID: 26175090
ESC	TC	MIF	CD74_CD44	0.00486665	0	MIF_CD74_CD44	MIF - (CD74+CD44)	MIF	Secreted Signaling	PMID: 29637711; PMID: 26175090
MDC	MDC	IL1A	IL1R2	0.0100792	0	IL1A_IL1R2	IL1A - IL1R2	IL1	Secreted Signaling	KEGG: hsa04060
MDC	MDC	IL1B	IL1R2	0.00766193	0	IL1B_IL1R2	IL1B - IL1R2	IL1	Secreted Signaling	KEGG: hsa04060
SMC	EC	NAMPT	ITGA5_ITGB1	0.00394794	0	NAMPT_ITGA5_ITGB1	NAMPT - (ITGA5+ITGB1)	VISFATIN	Secreted Signaling	PMID: 28490838
EC	EC	NAMPT	ITGA5_ITGB1	0.00232262	0	NAMPT_ITGA5_ITGB1	NAMPT - (ITGA5+ITGB1)	VISFATIN	Secreted Signaling	PMID: 28490838
MDC	EC	NAMPT	ITGA5_ITGB1	0.0104214	0	NAMPT_ITGA5_ITGB1	NAMPT - (ITGA5+ITGB1)	VISFATIN	Secreted Signaling	PMID: 28490838
TC	EC	NAMPT	ITGA5_ITGB1	0.00329544	0	NAMPT_ITGA5_ITGB1	NAMPT - (ITGA5+ITGB1)	VISFATIN	Secreted Signaling	PMID: 28490838
ESC	EC	NAMPT	ITGA5_ITGB1	0.00154742	0	NAMPT_ITGA5_ITGB1	NAMPT - (ITGA5+ITGB1)	VISFATIN	Secreted Signaling	PMID: 28490838
FB	SMC	ANGPTL1	ITGA1_ITGB1	0.0087289	0	ANGPTL1_ITGA1_ITGB1	ANGPTL1 - (ITGA1+ITGB1)	ANGPTL	Secreted Signaling	PMID: 24478758
FB	ESC	ANGPTL1	ITGA1_ITGB1	0.00823207	0	ANGPTL1_ITGA1_ITGB1	ANGPTL1 - (ITGA1+ITGB1)	ANGPTL	Secreted Signaling	PMID: 24478758
FB	EC	ANGPTL2	ITGA5_ITGB1	0.00421417	0	ANGPTL2_ITGA5_ITGB1	ANGPTL2 - (ITGA5+ITGB1)	ANGPTL	Secreted Signaling	PMID: 24478758
FB	EC	ANGPTL4	ITGA5_ITGB1	0.00332179	0	ANGPTL4_ITGA5_ITGB1	ANGPTL4 - (ITGA5+ITGB1)	ANGPTL	Secreted Signaling	PMID: 30049845
FB	EC	ANGPTL4	CDH5	0.00363983	0	ANGPTL4_CDH5	ANGPTL4 - CDH5	ANGPTL	Secreted Signaling	PMID: 30049845
FB	KE	ANGPTL4	SDC1	0.00196986	0	ANGPTL4_SDC1	ANGPTL4 - SDC1	ANGPTL	Secreted Signaling	PMID: 29017031
FB	FB	ANGPTL4	SDC2	0.00194165	0	ANGPTL4_SDC2	ANGPTL4 - SDC2	ANGPTL	Secreted Signaling	PMID: 29017031
SMC	EC	ANGPT2	ITGA5_ITGB1	0.00228956	0	ANGPT2_ITGA5_ITGB1	ANGPT2 - (ITGA5+ITGB1)	ANGPT	Secreted Signaling	PMID: 20651738; PMID: 25635707
EC	KE	MDK	SDC1	0.00154506	0	MDK_SDC1	MDK - SDC1	MK	Secreted Signaling	PMID: 28356350
ESC	KE	MDK	SDC1	0.00211171	0	MDK_SDC1	MDK - SDC1	MK	Secreted Signaling	PMID: 28356350
EC	FB	MDK	SDC2	0.00152293	0	MDK_SDC2	MDK - SDC2	MK	Secreted Signaling	PMID: 28356350
ESC	FB	MDK	SDC2	0.00208147	0	MDK_SDC2	MDK - SDC2	MK	Secreted Signaling	PMID: 28356350
EC	EC	MDK	ITGA6_ITGB1	0.00267976	0	MDK_ITGA6_ITGB1	MDK - (ITGA6+ITGB1)	MK	Secreted Signaling	PMID: 28356350
ESC	EC	MDK	ITGA6_ITGB1	0.00366102	0	MDK_ITGA6_ITGB1	MDK - (ITGA6+ITGB1)	MK	Secreted Signaling	PMID: 28356350
EC	KE	MDK	ITGA6_ITGB1	0.00192486	0	MDK_ITGA6_ITGB1	MDK - (ITGA6+ITGB1)	MK	Secreted Signaling	PMID: 28356350
ESC	KE	MDK	ITGA6_ITGB1	0.00263043	0	MDK_ITGA6_ITGB1	MDK - (ITGA6+ITGB1)	MK	Secreted Signaling	PMID: 28356350
EC	FB	MDK	LRP1	0.00930212	0	MDK_LRP1	MDK - LRP1	MK	Secreted Signaling	PMID: 28356350
ESC	FB	MDK	LRP1	0.0126775	0	MDK_LRP1	MDK - LRP1	MK	Secreted Signaling	PMID: 28356350
EC	SMC	MDK	NCL	0.0127258	0	MDK_NCL	MDK - NCL	MK	Secreted Signaling	PMID: 28356350
ESC	SMC	MDK	NCL	0.0173218	0	MDK_NCL	MDK - NCL	MK	Secreted Signaling	PMID: 28356350
EC	FB	MDK	NCL	0.00326225	0	MDK_NCL	MDK - NCL	MK	Secreted Signaling	PMID: 28356350
ESC	FB	MDK	NCL	0.00445586	0	MDK_NCL	MDK - NCL	MK	Secreted Signaling	PMID: 28356350
EC	EC	MDK	NCL	0.0105638	0	MDK_NCL	MDK - NCL	MK	Secreted Signaling	PMID: 28356350
ESC	EC	MDK	NCL	0.0143903	0	MDK_NCL	MDK - NCL	MK	Secreted Signaling	PMID: 28356350
EC	MDC	MDK	NCL	0.011642	0	MDK_NCL	MDK - NCL	MK	Secreted Signaling	PMID: 28356350
ESC	MDC	MDK	NCL	0.0158528	0	MDK_NCL	MDK - NCL	MK	Secreted Signaling	PMID: 28356350
EC	TC	MDK	NCL	0.0186793	0	MDK_NCL	MDK - NCL	MK	Secreted Signaling	PMID: 28356350
ESC	TC	MDK	NCL	0.0253702	0	MDK_NCL	MDK - NCL	MK	Secreted Signaling	PMID: 28356350
EC	KE	MDK	NCL	0.0095005	0	MDK_NCL	MDK - NCL	MK	Secreted Signaling	PMID: 28356350
ESC	KE	MDK	NCL	0.0129469	0	MDK_NCL	MDK - NCL	MK	Secreted Signaling	PMID: 28356350
EC	ESC	MDK	NCL	0.0107087	0	MDK_NCL	MDK - NCL	MK	Secreted Signaling	PMID: 28356350
ESC	ESC	MDK	NCL	0.014587	0	MDK_NCL	MDK - NCL	MK	Secreted Signaling	PMID: 28356350
EC	KE	MDK	ALK	0.000590714	0	MDK_ALK	MDK - ALK	MK	Secreted Signaling	PMID: 19459784
ESC	KE	MDK	ALK	0.000807638	0	MDK_ALK	MDK - ALK	MK	Secreted Signaling	PMID: 19459784
FB	KE	PTN	SDC1	0.0028463	0	PTN_SDC1	PTN - SDC1	PTN	Secreted Signaling	PMID: 28356350; PMID: 25620911
FB	FB	PTN	SDC2	0.00280557	0	PTN_SDC2	PTN - SDC2	PTN	Secreted Signaling	PMID: 28356350; PMID: 25620911
FB	SMC	PTN	NCL	0.0232243	0	PTN_NCL	PTN - NCL	PTN	Secreted Signaling	PMID: 28356350; PMID: 25620911
FB	FB	PTN	NCL	0.006001	0	PTN_NCL	PTN - NCL	PTN	Secreted Signaling	PMID: 28356350; PMID: 25620911
FB	EC	PTN	NCL	0.0193136	0	PTN_NCL	PTN - NCL	PTN	Secreted Signaling	PMID: 28356350; PMID: 25620911
FB	MDC	PTN	NCL	0.0212656	0	PTN_NCL	PTN - NCL	PTN	Secreted Signaling	PMID: 28356350; PMID: 25620911
FB	TC	PTN	NCL	0.0339206	0	PTN_NCL	PTN - NCL	PTN	Secreted Signaling	PMID: 28356350; PMID: 25620911
FB	KE	PTN	NCL	0.0173851	0	PTN_NCL	PTN - NCL	PTN	Secreted Signaling	PMID: 28356350; PMID: 25620911
FB	ESC	PTN	NCL	0.0195762	0	PTN_NCL	PTN - NCL	PTN	Secreted Signaling	PMID: 28356350; PMID: 25620911
FB	KE	PTN	ALK	0.00108908	0	PTN_ALK	PTN - ALK	PTN	Secreted Signaling	PMID: 28356350; PMID: 25620911
EC	SMC	EDN1	EDNRB	0.00298872	0	EDN1_EDNRB	EDN1 - EDNRB	EDN	Secreted Signaling	KEGG: hsa04080
FB	EC	ADM	CALCRL	0.00333866	0	ADM_CALCRL	ADM - CALCRL	CALCR	Secreted Signaling	KEGG: hsa04080
SMC	SMC	COL1A1	ITGA1_ITGB1	0.0119348	0	COL1A1_ITGA1_ITGB1	COL1A1 - (ITGA1+ITGB1)	COLLAGEN	ECM-Receptor	KEGG: hsa04512
FB	SMC	COL1A1	ITGA1_ITGB1	0.126815	0	COL1A1_ITGA1_ITGB1	COL1A1 - (ITGA1+ITGB1)	COLLAGEN	ECM-Receptor	KEGG: hsa04512
EC	SMC	COL1A1	ITGA1_ITGB1	0.00903547	0	COL1A1_ITGA1_ITGB1	COL1A1 - (ITGA1+ITGB1)	COLLAGEN	ECM-Receptor	KEGG: hsa04512
MDC	SMC	COL1A1	ITGA1_ITGB1	0.00977753	0	COL1A1_ITGA1_ITGB1	COL1A1 - (ITGA1+ITGB1)	COLLAGEN	ECM-Receptor	KEGG: hsa04512
TC	SMC	COL1A1	ITGA1_ITGB1	0.0117055	0	COL1A1_ITGA1_ITGB1	COL1A1 - (ITGA1+ITGB1)	COLLAGEN	ECM-Receptor	KEGG: hsa04512
KE	SMC	COL1A1	ITGA1_ITGB1	0.00886965	0	COL1A1_ITGA1_ITGB1	COL1A1 - (ITGA1+ITGB1)	COLLAGEN	ECM-Receptor	KEGG: hsa04512
ESC	SMC	COL1A1	ITGA1_ITGB1	0.0383165	0	COL1A1_ITGA1_ITGB1	COL1A1 - (ITGA1+ITGB1)	COLLAGEN	ECM-Receptor	KEGG: hsa04512
SMC	ESC	COL1A1	ITGA1_ITGB1	0.0112575	0	COL1A1_ITGA1_ITGB1	COL1A1 - (ITGA1+ITGB1)	COLLAGEN	ECM-Receptor	KEGG: hsa04512
FB	ESC	COL1A1	ITGA1_ITGB1	0.120413	0	COL1A1_ITGA1_ITGB1	COL1A1 - (ITGA1+ITGB1)	COLLAGEN	ECM-Receptor	KEGG: hsa04512
EC	ESC	COL1A1	ITGA1_ITGB1	0.00852135	0	COL1A1_ITGA1_ITGB1	COL1A1 - (ITGA1+ITGB1)	COLLAGEN	ECM-Receptor	KEGG: hsa04512
MDC	ESC	COL1A1	ITGA1_ITGB1	0.00922158	0	COL1A1_ITGA1_ITGB1	COL1A1 - (ITGA1+ITGB1)	COLLAGEN	ECM-Receptor	KEGG: hsa04512
TC	ESC	COL1A1	ITGA1_ITGB1	0.0110412	0	COL1A1_ITGA1_ITGB1	COL1A1 - (ITGA1+ITGB1)	COLLAGEN	ECM-Receptor	KEGG: hsa04512
KE	ESC	COL1A1	ITGA1_ITGB1	0.00836488	0	COL1A1_ITGA1_ITGB1	COL1A1 - (ITGA1+ITGB1)	COLLAGEN	ECM-Receptor	KEGG: hsa04512
ESC	ESC	COL1A1	ITGA1_ITGB1	0.0361971	0	COL1A1_ITGA1_ITGB1	COL1A1 - (ITGA1+ITGB1)	COLLAGEN	ECM-Receptor	KEGG: hsa04512
SMC	SMC	COL1A2	ITGA1_ITGB1	0.0387679	0	COL1A2_ITGA1_ITGB1	COL1A2 - (ITGA1+ITGB1)	COLLAGEN	ECM-Receptor	KEGG: hsa04512
FB	SMC	COL1A2	ITGA1_ITGB1	0.137117	0	COL1A2_ITGA1_ITGB1	COL1A2 - (ITGA1+ITGB1)	COLLAGEN	ECM-Receptor	KEGG: hsa04512
EC	SMC	COL1A2	ITGA1_ITGB1	0.0274295	0	COL1A2_ITGA1_ITGB1	COL1A2 - (ITGA1+ITGB1)	COLLAGEN	ECM-Receptor	KEGG: hsa04512
MDC	SMC	COL1A2	ITGA1_ITGB1	0.0318188	0	COL1A2_ITGA1_ITGB1	COL1A2 - (ITGA1+ITGB1)	COLLAGEN	ECM-Receptor	KEGG: hsa04512
TC	SMC	COL1A2	ITGA1_ITGB1	0.0365331	0	COL1A2_ITGA1_ITGB1	COL1A2 - (ITGA1+ITGB1)	COLLAGEN	ECM-Receptor	KEGG: hsa04512
KE	SMC	COL1A2	ITGA1_ITGB1	0.0286247	0	COL1A2_ITGA1_ITGB1	COL1A2 - (ITGA1+ITGB1)	COLLAGEN	ECM-Receptor	KEGG: hsa04512
ESC	SMC	COL1A2	ITGA1_ITGB1	0.0610968	0	COL1A2_ITGA1_ITGB1	COL1A2 - (ITGA1+ITGB1)	COLLAGEN	ECM-Receptor	KEGG: hsa04512
SMC	ESC	COL1A2	ITGA1_ITGB1	0.0366245	0	COL1A2_ITGA1_ITGB1	COL1A2 - (ITGA1+ITGB1)	COLLAGEN	ECM-Receptor	KEGG: hsa04512
FB	ESC	COL1A2	ITGA1_ITGB1	0.130273	0	COL1A2_ITGA1_ITGB1	COL1A2 - (ITGA1+ITGB1)	COLLAGEN	ECM-Receptor	KEGG: hsa04512
EC	ESC	COL1A2	ITGA1_ITGB1	0.0258961	0	COL1A2_ITGA1_ITGB1	COL1A2 - (ITGA1+ITGB1)	COLLAGEN	ECM-Receptor	KEGG: hsa04512
MDC	ESC	COL1A2	ITGA1_ITGB1	0.0300476	0	COL1A2_ITGA1_ITGB1	COL1A2 - (ITGA1+ITGB1)	COLLAGEN	ECM-Receptor	KEGG: hsa04512
TC	ESC	COL1A2	ITGA1_ITGB1	0.0345088	0	COL1A2_ITGA1_ITGB1	COL1A2 - (ITGA1+ITGB1)	COLLAGEN	ECM-Receptor	KEGG: hsa04512
KE	ESC	COL1A2	ITGA1_ITGB1	0.0270263	0	COL1A2_ITGA1_ITGB1	COL1A2 - (ITGA1+ITGB1)	COLLAGEN	ECM-Receptor	KEGG: hsa04512
ESC	ESC	COL1A2	ITGA1_ITGB1	0.0577931	0	COL1A2_ITGA1_ITGB1	COL1A2 - (ITGA1+ITGB1)	COLLAGEN	ECM-Receptor	KEGG: hsa04512
SMC	SMC	COL4A1	ITGA1_ITGB1	0.0433503	0	COL4A1_ITGA1_ITGB1	COL4A1 - (ITGA1+ITGB1)	COLLAGEN	ECM-Receptor	KEGG: hsa04512
FB	SMC	COL4A1	ITGA1_ITGB1	0.0071538	0	COL4A1_ITGA1_ITGB1	COL4A1 - (ITGA1+ITGB1)	COLLAGEN	ECM-Receptor	KEGG: hsa04512
EC	SMC	COL4A1	ITGA1_ITGB1	0.0286285	0	COL4A1_ITGA1_ITGB1	COL4A1 - (ITGA1+ITGB1)	COLLAGEN	ECM-Receptor	KEGG: hsa04512
ESC	SMC	COL4A1	ITGA1_ITGB1	0.0398013	0	COL4A1_ITGA1_ITGB1	COL4A1 - (ITGA1+ITGB1)	COLLAGEN	ECM-Receptor	KEGG: hsa04512
SMC	ESC	COL4A1	ITGA1_ITGB1	0.0409644	0	COL4A1_ITGA1_ITGB1	COL4A1 - (ITGA1+ITGB1)	COLLAGEN	ECM-Receptor	KEGG: hsa04512
FB	ESC	COL4A1	ITGA1_ITGB1	0.00674602	0	COL4A1_ITGA1_ITGB1	COL4A1 - (ITGA1+ITGB1)	COLLAGEN	ECM-Receptor	KEGG: hsa04512
EC	ESC	COL4A1	ITGA1_ITGB1	0.0270299	0	COL4A1_ITGA1_ITGB1	COL4A1 - (ITGA1+ITGB1)	COLLAGEN	ECM-Receptor	KEGG: hsa04512
ESC	ESC	COL4A1	ITGA1_ITGB1	0.037603	0	COL4A1_ITGA1_ITGB1	COL4A1 - (ITGA1+ITGB1)	COLLAGEN	ECM-Receptor	KEGG: hsa04512
SMC	SMC	COL4A2	ITGA1_ITGB1	0.0128013	0	COL4A2_ITGA1_ITGB1	COL4A2 - (ITGA1+ITGB1)	COLLAGEN	ECM-Receptor	KEGG: hsa04512
EC	SMC	COL4A2	ITGA1_ITGB1	0.00933971	0	COL4A2_ITGA1_ITGB1	COL4A2 - (ITGA1+ITGB1)	COLLAGEN	ECM-Receptor	KEGG: hsa04512
ESC	SMC	COL4A2	ITGA1_ITGB1	0.0124253	0	COL4A2_ITGA1_ITGB1	COL4A2 - (ITGA1+ITGB1)	COLLAGEN	ECM-Receptor	KEGG: hsa04512
SMC	ESC	COL4A2	ITGA1_ITGB1	0.0120755	0	COL4A2_ITGA1_ITGB1	COL4A2 - (ITGA1+ITGB1)	COLLAGEN	ECM-Receptor	KEGG: hsa04512
EC	ESC	COL4A2	ITGA1_ITGB1	0.00880843	0	COL4A2_ITGA1_ITGB1	COL4A2 - (ITGA1+ITGB1)	COLLAGEN	ECM-Receptor	KEGG: hsa04512
ESC	ESC	COL4A2	ITGA1_ITGB1	0.0117206	0	COL4A2_ITGA1_ITGB1	COL4A2 - (ITGA1+ITGB1)	COLLAGEN	ECM-Receptor	KEGG: hsa04512
SMC	SMC	COL6A2	ITGA1_ITGB1	0.0100297	0	COL6A2_ITGA1_ITGB1	COL6A2 - (ITGA1+ITGB1)	COLLAGEN	ECM-Receptor	KEGG: hsa04512
FB	SMC	COL6A2	ITGA1_ITGB1	0.0560884	0	COL6A2_ITGA1_ITGB1	COL6A2 - (ITGA1+ITGB1)	COLLAGEN	ECM-Receptor	KEGG: hsa04512
ESC	SMC	COL6A2	ITGA1_ITGB1	0.0131828	0	COL6A2_ITGA1_ITGB1	COL6A2 - (ITGA1+ITGB1)	COLLAGEN	ECM-Receptor	KEGG: hsa04512
SMC	ESC	COL6A2	ITGA1_ITGB1	0.00945956	0	COL6A2_ITGA1_ITGB1	COL6A2 - (ITGA1+ITGB1)	COLLAGEN	ECM-Receptor	KEGG: hsa04512
FB	ESC	COL6A2	ITGA1_ITGB1	0.0530402	0	COL6A2_ITGA1_ITGB1	COL6A2 - (ITGA1+ITGB1)	COLLAGEN	ECM-Receptor	KEGG: hsa04512
ESC	ESC	COL6A2	ITGA1_ITGB1	0.0124357	0	COL6A2_ITGA1_ITGB1	COL6A2 - (ITGA1+ITGB1)	COLLAGEN	ECM-Receptor	KEGG: hsa04512
SMC	SMC	COL6A3	ITGA1_ITGB1	0.00930833	0	COL6A3_ITGA1_ITGB1	COL6A3 - (ITGA1+ITGB1)	COLLAGEN	ECM-Receptor	KEGG: hsa04512
FB	SMC	COL6A3	ITGA1_ITGB1	0.070039	0	COL6A3_ITGA1_ITGB1	COL6A3 - (ITGA1+ITGB1)	COLLAGEN	ECM-Receptor	KEGG: hsa04512
ESC	SMC	COL6A3	ITGA1_ITGB1	0.0121303	0	COL6A3_ITGA1_ITGB1	COL6A3 - (ITGA1+ITGB1)	COLLAGEN	ECM-Receptor	KEGG: hsa04512
SMC	ESC	COL6A3	ITGA1_ITGB1	0.00877882	0	COL6A3_ITGA1_ITGB1	COL6A3 - (ITGA1+ITGB1)	COLLAGEN	ECM-Receptor	KEGG: hsa04512
FB	ESC	COL6A3	ITGA1_ITGB1	0.0662859	0	COL6A3_ITGA1_ITGB1	COL6A3 - (ITGA1+ITGB1)	COLLAGEN	ECM-Receptor	KEGG: hsa04512
ESC	ESC	COL6A3	ITGA1_ITGB1	0.0114421	0	COL6A3_ITGA1_ITGB1	COL6A3 - (ITGA1+ITGB1)	COLLAGEN	ECM-Receptor	KEGG: hsa04512
SMC	EC	FN1	ITGA5_ITGB1	0.006688	0	FN1_ITGA5_ITGB1	FN1 - (ITGA5+ITGB1)	FN1	ECM-Receptor	KEGG: hsa04512
FB	EC	FN1	ITGA5_ITGB1	0.0316647	0	FN1_ITGA5_ITGB1	FN1 - (ITGA5+ITGB1)	FN1	ECM-Receptor	KEGG: hsa04512
ESC	EC	FN1	ITGA5_ITGB1	0.00678169	0	FN1_ITGA5_ITGB1	FN1 - (ITGA5+ITGB1)	FN1	ECM-Receptor	KEGG: hsa04512
FB	SMC	LAMA2	ITGA1_ITGB1	0.0204485	0	LAMA2_ITGA1_ITGB1	LAMA2 - (ITGA1+ITGB1)	LAMININ	ECM-Receptor	KEGG: hsa04512
FB	ESC	LAMA2	ITGA1_ITGB1	0.0192976	0	LAMA2_ITGA1_ITGB1	LAMA2 - (ITGA1+ITGB1)	LAMININ	ECM-Receptor	KEGG: hsa04512
KE	SMC	LAMA3	ITGA1_ITGB1	0.00462242	0	LAMA3_ITGA1_ITGB1	LAMA3 - (ITGA1+ITGB1)	LAMININ	ECM-Receptor	KEGG: hsa04512
KE	ESC	LAMA3	ITGA1_ITGB1	0.00435829	0	LAMA3_ITGA1_ITGB1	LAMA3 - (ITGA1+ITGB1)	LAMININ	ECM-Receptor	KEGG: hsa04512
SMC	SMC	LAMA4	ITGA1_ITGB1	0.0129472	0	LAMA4_ITGA1_ITGB1	LAMA4 - (ITGA1+ITGB1)	LAMININ	ECM-Receptor	KEGG: hsa04512
FB	SMC	LAMA4	ITGA1_ITGB1	0.00978717	0	LAMA4_ITGA1_ITGB1	LAMA4 - (ITGA1+ITGB1)	LAMININ	ECM-Receptor	KEGG: hsa04512
ESC	SMC	LAMA4	ITGA1_ITGB1	0.0109871	0	LAMA4_ITGA1_ITGB1	LAMA4 - (ITGA1+ITGB1)	LAMININ	ECM-Receptor	KEGG: hsa04512
SMC	ESC	LAMA4	ITGA1_ITGB1	0.0122133	0	LAMA4_ITGA1_ITGB1	LAMA4 - (ITGA1+ITGB1)	LAMININ	ECM-Receptor	KEGG: hsa04512
FB	ESC	LAMA4	ITGA1_ITGB1	0.00923067	0	LAMA4_ITGA1_ITGB1	LAMA4 - (ITGA1+ITGB1)	LAMININ	ECM-Receptor	KEGG: hsa04512
ESC	ESC	LAMA4	ITGA1_ITGB1	0.0103631	0	LAMA4_ITGA1_ITGB1	LAMA4 - (ITGA1+ITGB1)	LAMININ	ECM-Receptor	KEGG: hsa04512
FB	SMC	LAMB1	ITGA1_ITGB1	0.0265293	0	LAMB1_ITGA1_ITGB1	LAMB1 - (ITGA1+ITGB1)	LAMININ	ECM-Receptor	KEGG: hsa04512
KE	SMC	LAMB1	ITGA1_ITGB1	0.00760934	0	LAMB1_ITGA1_ITGB1	LAMB1 - (ITGA1+ITGB1)	LAMININ	ECM-Receptor	KEGG: hsa04512
ESC	SMC	LAMB1	ITGA1_ITGB1	0.0120206	0	LAMB1_ITGA1_ITGB1	LAMB1 - (ITGA1+ITGB1)	LAMININ	ECM-Receptor	KEGG: hsa04512
FB	ESC	LAMB1	ITGA1_ITGB1	0.0250449	0	LAMB1_ITGA1_ITGB1	LAMB1 - (ITGA1+ITGB1)	LAMININ	ECM-Receptor	KEGG: hsa04512
KE	ESC	LAMB1	ITGA1_ITGB1	0.00717578	0	LAMB1_ITGA1_ITGB1	LAMB1 - (ITGA1+ITGB1)	LAMININ	ECM-Receptor	KEGG: hsa04512
ESC	ESC	LAMB1	ITGA1_ITGB1	0.0113386	0	LAMB1_ITGA1_ITGB1	LAMB1 - (ITGA1+ITGB1)	LAMININ	ECM-Receptor	KEGG: hsa04512
SMC	SMC	LAMB2	ITGA1_ITGB1	0.0108246	0	LAMB2_ITGA1_ITGB1	LAMB2 - (ITGA1+ITGB1)	LAMININ	ECM-Receptor	KEGG: hsa04512
FB	SMC	LAMB2	ITGA1_ITGB1	0.00821396	0	LAMB2_ITGA1_ITGB1	LAMB2 - (ITGA1+ITGB1)	LAMININ	ECM-Receptor	KEGG: hsa04512
EC	SMC	LAMB2	ITGA1_ITGB1	0.0053773	0	LAMB2_ITGA1_ITGB1	LAMB2 - (ITGA1+ITGB1)	LAMININ	ECM-Receptor	KEGG: hsa04512
ESC	SMC	LAMB2	ITGA1_ITGB1	0.00881172	0	LAMB2_ITGA1_ITGB1	LAMB2 - (ITGA1+ITGB1)	LAMININ	ECM-Receptor	KEGG: hsa04512
SMC	ESC	LAMB2	ITGA1_ITGB1	0.0102097	0	LAMB2_ITGA1_ITGB1	LAMB2 - (ITGA1+ITGB1)	LAMININ	ECM-Receptor	KEGG: hsa04512
FB	ESC	LAMB2	ITGA1_ITGB1	0.00774621	0	LAMB2_ITGA1_ITGB1	LAMB2 - (ITGA1+ITGB1)	LAMININ	ECM-Receptor	KEGG: hsa04512
EC	ESC	LAMB2	ITGA1_ITGB1	0.00507026	0	LAMB2_ITGA1_ITGB1	LAMB2 - (ITGA1+ITGB1)	LAMININ	ECM-Receptor	KEGG: hsa04512
ESC	ESC	LAMB2	ITGA1_ITGB1	0.00831022	0	LAMB2_ITGA1_ITGB1	LAMB2 - (ITGA1+ITGB1)	LAMININ	ECM-Receptor	KEGG: hsa04512
SMC	SMC	LAMC1	ITGA1_ITGB1	0.0237419	0	LAMC1_ITGA1_ITGB1	LAMC1 - (ITGA1+ITGB1)	LAMININ	ECM-Receptor	KEGG: hsa04512
FB	SMC	LAMC1	ITGA1_ITGB1	0.0213729	0	LAMC1_ITGA1_ITGB1	LAMC1 - (ITGA1+ITGB1)	LAMININ	ECM-Receptor	KEGG: hsa04512
EC	SMC	LAMC1	ITGA1_ITGB1	0.00715104	0	LAMC1_ITGA1_ITGB1	LAMC1 - (ITGA1+ITGB1)	LAMININ	ECM-Receptor	KEGG: hsa04512
ESC	SMC	LAMC1	ITGA1_ITGB1	0.0110137	0	LAMC1_ITGA1_ITGB1	LAMC1 - (ITGA1+ITGB1)	LAMININ	ECM-Receptor	KEGG: hsa04512
SMC	ESC	LAMC1	ITGA1_ITGB1	0.0224099	0	LAMC1_ITGA1_ITGB1	LAMC1 - (ITGA1+ITGB1)	LAMININ	ECM-Receptor	KEGG: hsa04512
FB	ESC	LAMC1	ITGA1_ITGB1	0.020171	0	LAMC1_ITGA1_ITGB1	LAMC1 - (ITGA1+ITGB1)	LAMININ	ECM-Receptor	KEGG: hsa04512
EC	ESC	LAMC1	ITGA1_ITGB1	0.00674342	0	LAMC1_ITGA1_ITGB1	LAMC1 - (ITGA1+ITGB1)	LAMININ	ECM-Receptor	KEGG: hsa04512
ESC	ESC	LAMC1	ITGA1_ITGB1	0.0103882	0	LAMC1_ITGA1_ITGB1	LAMC1 - (ITGA1+ITGB1)	LAMININ	ECM-Receptor	KEGG: hsa04512
FB	EC	LAMA2	ITGA6_ITGB1	0.00952172	0	LAMA2_ITGA6_ITGB1	LAMA2 - (ITGA6+ITGB1)	LAMININ	ECM-Receptor	KEGG: hsa04512
FB	KE	LAMA2	ITGA6_ITGB1	0.00685266	0	LAMA2_ITGA6_ITGB1	LAMA2 - (ITGA6+ITGB1)	LAMININ	ECM-Receptor	KEGG: hsa04512
KE	EC	LAMA3	ITGA6_ITGB1	0.00213398	0	LAMA3_ITGA6_ITGB1	LAMA3 - (ITGA6+ITGB1)	LAMININ	ECM-Receptor	KEGG: hsa04512
KE	KE	LAMA3	ITGA6_ITGB1	0.00153259	0	LAMA3_ITGA6_ITGB1	LAMA3 - (ITGA6+ITGB1)	LAMININ	ECM-Receptor	KEGG: hsa04512
SMC	EC	LAMA4	ITGA6_ITGB1	0.00600422	0	LAMA4_ITGA6_ITGB1	LAMA4 - (ITGA6+ITGB1)	LAMININ	ECM-Receptor	KEGG: hsa04512
FB	EC	LAMA4	ITGA6_ITGB1	0.00453098	0	LAMA4_ITGA6_ITGB1	LAMA4 - (ITGA6+ITGB1)	LAMININ	ECM-Receptor	KEGG: hsa04512
ESC	EC	LAMA4	ITGA6_ITGB1	0.00508982	0	LAMA4_ITGA6_ITGB1	LAMA4 - (ITGA6+ITGB1)	LAMININ	ECM-Receptor	KEGG: hsa04512
SMC	KE	LAMA4	ITGA6_ITGB1	0.00431687	0	LAMA4_ITGA6_ITGB1	LAMA4 - (ITGA6+ITGB1)	LAMININ	ECM-Receptor	KEGG: hsa04512
FB	KE	LAMA4	ITGA6_ITGB1	0.00325629	0	LAMA4_ITGA6_ITGB1	LAMA4 - (ITGA6+ITGB1)	LAMININ	ECM-Receptor	KEGG: hsa04512
ESC	KE	LAMA4	ITGA6_ITGB1	0.00365849	0	LAMA4_ITGA6_ITGB1	LAMA4 - (ITGA6+ITGB1)	LAMININ	ECM-Receptor	KEGG: hsa04512
FB	EC	LAMB1	ITGA6_ITGB1	0.0123943	0	LAMB1_ITGA6_ITGB1	LAMB1 - (ITGA6+ITGB1)	LAMININ	ECM-Receptor	KEGG: hsa04512
KE	EC	LAMB1	ITGA6_ITGB1	0.0035186	0	LAMB1_ITGA6_ITGB1	LAMB1 - (ITGA6+ITGB1)	LAMININ	ECM-Receptor	KEGG: hsa04512
ESC	EC	LAMB1	ITGA6_ITGB1	0.0055717	0	LAMB1_ITGA6_ITGB1	LAMB1 - (ITGA6+ITGB1)	LAMININ	ECM-Receptor	KEGG: hsa04512
FB	KE	LAMB1	ITGA6_ITGB1	0.00892729	0	LAMB1_ITGA6_ITGB1	LAMB1 - (ITGA6+ITGB1)	LAMININ	ECM-Receptor	KEGG: hsa04512
KE	KE	LAMB1	ITGA6_ITGB1	0.002528	0	LAMB1_ITGA6_ITGB1	LAMB1 - (ITGA6+ITGB1)	LAMININ	ECM-Receptor	KEGG: hsa04512
ESC	KE	LAMB1	ITGA6_ITGB1	0.00400541	0	LAMB1_ITGA6_ITGB1	LAMB1 - (ITGA6+ITGB1)	LAMININ	ECM-Receptor	KEGG: hsa04512
SMC	EC	LAMB2	ITGA6_ITGB1	0.00501407	0	LAMB2_ITGA6_ITGB1	LAMB2 - (ITGA6+ITGB1)	LAMININ	ECM-Receptor	KEGG: hsa04512
FB	EC	LAMB2	ITGA6_ITGB1	0.00379942	0	LAMB2_ITGA6_ITGB1	LAMB2 - (ITGA6+ITGB1)	LAMININ	ECM-Receptor	KEGG: hsa04512
EC	EC	LAMB2	ITGA6_ITGB1	0.00248349	0	LAMB2_ITGA6_ITGB1	LAMB2 - (ITGA6+ITGB1)	LAMININ	ECM-Receptor	KEGG: hsa04512
ESC	EC	LAMB2	ITGA6_ITGB1	0.00407724	0	LAMB2_ITGA6_ITGB1	LAMB2 - (ITGA6+ITGB1)	LAMININ	ECM-Receptor	KEGG: hsa04512
SMC	KE	LAMB2	ITGA6_ITGB1	0.00360397	0	LAMB2_ITGA6_ITGB1	LAMB2 - (ITGA6+ITGB1)	LAMININ	ECM-Receptor	KEGG: hsa04512
FB	KE	LAMB2	ITGA6_ITGB1	0.00272997	0	LAMB2_ITGA6_ITGB1	LAMB2 - (ITGA6+ITGB1)	LAMININ	ECM-Receptor	KEGG: hsa04512
EC	KE	LAMB2	ITGA6_ITGB1	0.00178378	0	LAMB2_ITGA6_ITGB1	LAMB2 - (ITGA6+ITGB1)	LAMININ	ECM-Receptor	KEGG: hsa04512
ESC	KE	LAMB2	ITGA6_ITGB1	0.00292982	0	LAMB2_ITGA6_ITGB1	LAMB2 - (ITGA6+ITGB1)	LAMININ	ECM-Receptor	KEGG: hsa04512
SMC	EC	LAMC1	ITGA6_ITGB1	0.0110752	0	LAMC1_ITGA6_ITGB1	LAMC1 - (ITGA6+ITGB1)	LAMININ	ECM-Receptor	KEGG: hsa04512
FB	EC	LAMC1	ITGA6_ITGB1	0.00995717	0	LAMC1_ITGA6_ITGB1	LAMC1 - (ITGA6+ITGB1)	LAMININ	ECM-Receptor	KEGG: hsa04512
EC	EC	LAMC1	ITGA6_ITGB1	0.00330586	0	LAMC1_ITGA6_ITGB1	LAMC1 - (ITGA6+ITGB1)	LAMININ	ECM-Receptor	KEGG: hsa04512
ESC	EC	LAMC1	ITGA6_ITGB1	0.00510221	0	LAMC1_ITGA6_ITGB1	LAMC1 - (ITGA6+ITGB1)	LAMININ	ECM-Receptor	KEGG: hsa04512
SMC	KE	LAMC1	ITGA6_ITGB1	0.00797415	0	LAMC1_ITGA6_ITGB1	LAMC1 - (ITGA6+ITGB1)	LAMININ	ECM-Receptor	KEGG: hsa04512
FB	KE	LAMC1	ITGA6_ITGB1	0.00716693	0	LAMC1_ITGA6_ITGB1	LAMC1 - (ITGA6+ITGB1)	LAMININ	ECM-Receptor	KEGG: hsa04512
EC	KE	LAMC1	ITGA6_ITGB1	0.00237501	0	LAMC1_ITGA6_ITGB1	LAMC1 - (ITGA6+ITGB1)	LAMININ	ECM-Receptor	KEGG: hsa04512
ESC	KE	LAMC1	ITGA6_ITGB1	0.00366741	0	LAMC1_ITGA6_ITGB1	LAMC1 - (ITGA6+ITGB1)	LAMININ	ECM-Receptor	KEGG: hsa04512
FB	SMC	LAMA2	ITGA7_ITGB1	0.0324408	0	LAMA2_ITGA7_ITGB1	LAMA2 - (ITGA7+ITGB1)	LAMININ	ECM-Receptor	KEGG: hsa04512
KE	SMC	LAMA3	ITGA7_ITGB1	0.00740344	0	LAMA3_ITGA7_ITGB1	LAMA3 - (ITGA7+ITGB1)	LAMININ	ECM-Receptor	KEGG: hsa04512
SMC	SMC	LAMA4	ITGA7_ITGB1	0.0206329	0	LAMA4_ITGA7_ITGB1	LAMA4 - (ITGA7+ITGB1)	LAMININ	ECM-Receptor	KEGG: hsa04512
FB	SMC	LAMA4	ITGA7_ITGB1	0.0156267	0	LAMA4_ITGA7_ITGB1	LAMA4 - (ITGA7+ITGB1)	LAMININ	ECM-Receptor	KEGG: hsa04512
ESC	SMC	LAMA4	ITGA7_ITGB1	0.01753	0	LAMA4_ITGA7_ITGB1	LAMA4 - (ITGA7+ITGB1)	LAMININ	ECM-Receptor	KEGG: hsa04512
FB	SMC	LAMB1	ITGA7_ITGB1	0.041935	0	LAMB1_ITGA7_ITGB1	LAMB1 - (ITGA7+ITGB1)	LAMININ	ECM-Receptor	KEGG: hsa04512
KE	SMC	LAMB1	ITGA7_ITGB1	0.0121654	0	LAMB1_ITGA7_ITGB1	LAMB1 - (ITGA7+ITGB1)	LAMININ	ECM-Receptor	KEGG: hsa04512
ESC	SMC	LAMB1	ITGA7_ITGB1	0.0191669	0	LAMB1_ITGA7_ITGB1	LAMB1 - (ITGA7+ITGB1)	LAMININ	ECM-Receptor	KEGG: hsa04512
SMC	SMC	LAMB2	ITGA7_ITGB1	0.0172723	0	LAMB2_ITGA7_ITGB1	LAMB2 - (ITGA7+ITGB1)	LAMININ	ECM-Receptor	KEGG: hsa04512
FB	SMC	LAMB2	ITGA7_ITGB1	0.0131273	0	LAMB2_ITGA7_ITGB1	LAMB2 - (ITGA7+ITGB1)	LAMININ	ECM-Receptor	KEGG: hsa04512
EC	SMC	LAMB2	ITGA7_ITGB1	0.00860855	0	LAMB2_ITGA7_ITGB1	LAMB2 - (ITGA7+ITGB1)	LAMININ	ECM-Receptor	KEGG: hsa04512
ESC	SMC	LAMB2	ITGA7_ITGB1	0.0140775	0	LAMB2_ITGA7_ITGB1	LAMB2 - (ITGA7+ITGB1)	LAMININ	ECM-Receptor	KEGG: hsa04512
SMC	SMC	LAMC1	ITGA7_ITGB1	0.0375915	0	LAMC1_ITGA7_ITGB1	LAMC1 - (ITGA7+ITGB1)	LAMININ	ECM-Receptor	KEGG: hsa04512
FB	SMC	LAMC1	ITGA7_ITGB1	0.0338885	0	LAMC1_ITGA7_ITGB1	LAMC1 - (ITGA7+ITGB1)	LAMININ	ECM-Receptor	KEGG: hsa04512
EC	SMC	LAMC1	ITGA7_ITGB1	0.0114359	0	LAMC1_ITGA7_ITGB1	LAMC1 - (ITGA7+ITGB1)	LAMININ	ECM-Receptor	KEGG: hsa04512
ESC	SMC	LAMC1	ITGA7_ITGB1	0.0175721	0	LAMC1_ITGA7_ITGB1	LAMC1 - (ITGA7+ITGB1)	LAMININ	ECM-Receptor	KEGG: hsa04512
SMC	KE	FN1	ITGAV_ITGB1	0.0043796	0	FN1_ITGAV_ITGB1	FN1 - (ITGAV+ITGB1)	FN1	ECM-Receptor	KEGG: hsa04512
FB	KE	FN1	ITGAV_ITGB1	0.020917	0	FN1_ITGAV_ITGB1	FN1 - (ITGAV+ITGB1)	FN1	ECM-Receptor	KEGG: hsa04512
ESC	KE	FN1	ITGAV_ITGB1	0.0044411	0	FN1_ITGAV_ITGB1	FN1 - (ITGAV+ITGB1)	FN1	ECM-Receptor	KEGG: hsa04512
SMC	ESC	FN1	ITGAV_ITGB1	0.00987	0	FN1_ITGAV_ITGB1	FN1 - (ITGAV+ITGB1)	FN1	ECM-Receptor	KEGG: hsa04512
FB	ESC	FN1	ITGAV_ITGB1	0.0461777	0	FN1_ITGAV_ITGB1	FN1 - (ITGAV+ITGB1)	FN1	ECM-Receptor	KEGG: hsa04512
ESC	ESC	FN1	ITGAV_ITGB1	0.0100078	0	FN1_ITGAV_ITGB1	FN1 - (ITGAV+ITGB1)	FN1	ECM-Receptor	KEGG: hsa04512
SMC	SMC	FN1	CD44	0.00687109	0	FN1_CD44	FN1 - CD44	FN1	ECM-Receptor	KEGG: hsa04512
FB	SMC	FN1	CD44	0.0325092	0	FN1_CD44	FN1 - CD44	FN1	ECM-Receptor	KEGG: hsa04512
ESC	SMC	FN1	CD44	0.00696733	0	FN1_CD44	FN1 - CD44	FN1	ECM-Receptor	KEGG: hsa04512
SMC	FB	FN1	CD44	0.00495779	0	FN1_CD44	FN1 - CD44	FN1	ECM-Receptor	KEGG: hsa04512
FB	FB	FN1	CD44	0.0236266	0	FN1_CD44	FN1 - CD44	FN1	ECM-Receptor	KEGG: hsa04512
ESC	FB	FN1	CD44	0.00502737	0	FN1_CD44	FN1 - CD44	FN1	ECM-Receptor	KEGG: hsa04512
SMC	MDC	FN1	CD44	0.0164867	0	FN1_CD44	FN1 - CD44	FN1	ECM-Receptor	KEGG: hsa04512
FB	MDC	FN1	CD44	0.0752838	0	FN1_CD44	FN1 - CD44	FN1	ECM-Receptor	KEGG: hsa04512
ESC	MDC	FN1	CD44	0.0167153	0	FN1_CD44	FN1 - CD44	FN1	ECM-Receptor	KEGG: hsa04512
SMC	TC	FN1	CD44	0.00792715	0	FN1_CD44	FN1 - CD44	FN1	ECM-Receptor	KEGG: hsa04512
FB	TC	FN1	CD44	0.0373575	0	FN1_CD44	FN1 - CD44	FN1	ECM-Receptor	KEGG: hsa04512
ESC	TC	FN1	CD44	0.00803806	0	FN1_CD44	FN1 - CD44	FN1	ECM-Receptor	KEGG: hsa04512
FB	ESC	FN1	CD44	0.0164375	0	FN1_CD44	FN1 - CD44	FN1	ECM-Receptor	KEGG: hsa04512
SMC	SMC	COL1A1	CD44	0.00552775	0	COL1A1_CD44	COL1A1 - CD44	COLLAGEN	ECM-Receptor	KEGG: hsa04512
FB	SMC	COL1A1	CD44	0.0626463	0	COL1A1_CD44	COL1A1 - CD44	COLLAGEN	ECM-Receptor	KEGG: hsa04512
EC	SMC	COL1A1	CD44	0.00417833	0	COL1A1_CD44	COL1A1 - CD44	COLLAGEN	ECM-Receptor	KEGG: hsa04512
MDC	SMC	COL1A1	CD44	0.0045233	0	COL1A1_CD44	COL1A1 - CD44	COLLAGEN	ECM-Receptor	KEGG: hsa04512
TC	SMC	COL1A1	CD44	0.0054209	0	COL1A1_CD44	COL1A1 - CD44	COLLAGEN	ECM-Receptor	KEGG: hsa04512
KE	SMC	COL1A1	CD44	0.00410128	0	COL1A1_CD44	COL1A1 - CD44	COLLAGEN	ECM-Receptor	KEGG: hsa04512
ESC	SMC	COL1A1	CD44	0.0180049	0	COL1A1_CD44	COL1A1 - CD44	COLLAGEN	ECM-Receptor	KEGG: hsa04512
SMC	FB	COL1A1	CD44	0.00398701	0.01	COL1A1_CD44	COL1A1 - CD44	COLLAGEN	ECM-Receptor	KEGG: hsa04512
FB	FB	COL1A1	CD44	0.0459202	0	COL1A1_CD44	COL1A1 - CD44	COLLAGEN	ECM-Receptor	KEGG: hsa04512
EC	FB	COL1A1	CD44	0.00301257	0.01	COL1A1_CD44	COL1A1 - CD44	COLLAGEN	ECM-Receptor	KEGG: hsa04512
MDC	FB	COL1A1	CD44	0.00326161	0.01	COL1A1_CD44	COL1A1 - CD44	COLLAGEN	ECM-Receptor	KEGG: hsa04512
TC	FB	COL1A1	CD44	0.00390983	0.01	COL1A1_CD44	COL1A1 - CD44	COLLAGEN	ECM-Receptor	KEGG: hsa04512
KE	FB	COL1A1	CD44	0.00295695	0.01	COL1A1_CD44	COL1A1 - CD44	COLLAGEN	ECM-Receptor	KEGG: hsa04512
ESC	FB	COL1A1	CD44	0.013032	0	COL1A1_CD44	COL1A1 - CD44	COLLAGEN	ECM-Receptor	KEGG: hsa04512
SMC	MDC	COL1A1	CD44	0.0132886	0	COL1A1_CD44	COL1A1 - CD44	COLLAGEN	ECM-Receptor	KEGG: hsa04512
FB	MDC	COL1A1	CD44	0.139362	0	COL1A1_CD44	COL1A1 - CD44	COLLAGEN	ECM-Receptor	KEGG: hsa04512
EC	MDC	COL1A1	CD44	0.0100638	0	COL1A1_CD44	COL1A1 - CD44	COLLAGEN	ECM-Receptor	KEGG: hsa04512
MDC	MDC	COL1A1	CD44	0.0108894	0	COL1A1_CD44	COL1A1 - CD44	COLLAGEN	ECM-Receptor	KEGG: hsa04512
TC	MDC	COL1A1	CD44	0.0130337	0	COL1A1_CD44	COL1A1 - CD44	COLLAGEN	ECM-Receptor	KEGG: hsa04512
KE	MDC	COL1A1	CD44	0.00987927	0	COL1A1_CD44	COL1A1 - CD44	COLLAGEN	ECM-Receptor	KEGG: hsa04512
ESC	MDC	COL1A1	CD44	0.0425342	0	COL1A1_CD44	COL1A1 - CD44	COLLAGEN	ECM-Receptor	KEGG: hsa04512
FB	TC	COL1A1	CD44	0.0716563	0	COL1A1_CD44	COL1A1 - CD44	COLLAGEN	ECM-Receptor	KEGG: hsa04512
ESC	TC	COL1A1	CD44	0.0207365	0	COL1A1_CD44	COL1A1 - CD44	COLLAGEN	ECM-Receptor	KEGG: hsa04512
FB	ESC	COL1A1	CD44	0.032171	0	COL1A1_CD44	COL1A1 - CD44	COLLAGEN	ECM-Receptor	KEGG: hsa04512
SMC	SMC	COL1A2	CD44	0.0182216	0	COL1A2_CD44	COL1A2 - CD44	COLLAGEN	ECM-Receptor	KEGG: hsa04512
FB	SMC	COL1A2	CD44	0.0681422	0	COL1A2_CD44	COL1A2 - CD44	COLLAGEN	ECM-Receptor	KEGG: hsa04512
EC	SMC	COL1A2	CD44	0.0128122	0	COL1A2_CD44	COL1A2 - CD44	COLLAGEN	ECM-Receptor	KEGG: hsa04512
MDC	SMC	COL1A2	CD44	0.0148983	0	COL1A2_CD44	COL1A2 - CD44	COLLAGEN	ECM-Receptor	KEGG: hsa04512
TC	SMC	COL1A2	CD44	0.01715	0	COL1A2_CD44	COL1A2 - CD44	COLLAGEN	ECM-Receptor	KEGG: hsa04512
KE	SMC	COL1A2	CD44	0.0133792	0	COL1A2_CD44	COL1A2 - CD44	COLLAGEN	ECM-Receptor	KEGG: hsa04512
ESC	SMC	COL1A2	CD44	0.0290744	0	COL1A2_CD44	COL1A2 - CD44	COLLAGEN	ECM-Receptor	KEGG: hsa04512
SMC	FB	COL1A2	CD44	0.0131896	0	COL1A2_CD44	COL1A2 - CD44	COLLAGEN	ECM-Receptor	KEGG: hsa04512
FB	FB	COL1A2	CD44	0.050027	0	COL1A2_CD44	COL1A2 - CD44	COLLAGEN	ECM-Receptor	KEGG: hsa04512
EC	FB	COL1A2	CD44	0.00926	0	COL1A2_CD44	COL1A2 - CD44	COLLAGEN	ECM-Receptor	KEGG: hsa04512
MDC	FB	COL1A2	CD44	0.010774	0	COL1A2_CD44	COL1A2 - CD44	COLLAGEN	ECM-Receptor	KEGG: hsa04512
TC	FB	COL1A2	CD44	0.0124102	0	COL1A2_CD44	COL1A2 - CD44	COLLAGEN	ECM-Receptor	KEGG: hsa04512
KE	FB	COL1A2	CD44	0.00967135	0	COL1A2_CD44	COL1A2 - CD44	COLLAGEN	ECM-Receptor	KEGG: hsa04512
ESC	FB	COL1A2	CD44	0.0211099	0	COL1A2_CD44	COL1A2 - CD44	COLLAGEN	ECM-Receptor	KEGG: hsa04512
SMC	MDC	COL1A2	CD44	0.043033	0	COL1A2_CD44	COL1A2 - CD44	COLLAGEN	ECM-Receptor	KEGG: hsa04512
FB	MDC	COL1A2	CD44	0.150508	0	COL1A2_CD44	COL1A2 - CD44	COLLAGEN	ECM-Receptor	KEGG: hsa04512
EC	MDC	COL1A2	CD44	0.0304868	0	COL1A2_CD44	COL1A2 - CD44	COLLAGEN	ECM-Receptor	KEGG: hsa04512
MDC	MDC	COL1A2	CD44	0.0353475	0	COL1A2_CD44	COL1A2 - CD44	COLLAGEN	ECM-Receptor	KEGG: hsa04512
TC	MDC	COL1A2	CD44	0.0405627	0	COL1A2_CD44	COL1A2 - CD44	COLLAGEN	ECM-Receptor	KEGG: hsa04512
KE	MDC	COL1A2	CD44	0.0318108	0	COL1A2_CD44	COL1A2 - CD44	COLLAGEN	ECM-Receptor	KEGG: hsa04512
ESC	MDC	COL1A2	CD44	0.0676456	0	COL1A2_CD44	COL1A2 - CD44	COLLAGEN	ECM-Receptor	KEGG: hsa04512
SMC	TC	COL1A2	CD44	0.0209853	0	COL1A2_CD44	COL1A2 - CD44	COLLAGEN	ECM-Receptor	KEGG: hsa04512
FB	TC	COL1A2	CD44	0.0778769	0	COL1A2_CD44	COL1A2 - CD44	COLLAGEN	ECM-Receptor	KEGG: hsa04512
EC	TC	COL1A2	CD44	0.0147678	0.02	COL1A2_CD44	COL1A2 - CD44	COLLAGEN	ECM-Receptor	KEGG: hsa04512
MDC	TC	COL1A2	CD44	0.0171667	0	COL1A2_CD44	COL1A2 - CD44	COLLAGEN	ECM-Receptor	KEGG: hsa04512
TC	TC	COL1A2	CD44	0.0197545	0	COL1A2_CD44	COL1A2 - CD44	COLLAGEN	ECM-Receptor	KEGG: hsa04512
KE	TC	COL1A2	CD44	0.01542	0.02	COL1A2_CD44	COL1A2 - CD44	COLLAGEN	ECM-Receptor	KEGG: hsa04512
ESC	TC	COL1A2	CD44	0.0334282	0	COL1A2_CD44	COL1A2 - CD44	COLLAGEN	ECM-Receptor	KEGG: hsa04512
FB	ESC	COL1A2	CD44	0.0350934	0	COL1A2_CD44	COL1A2 - CD44	COLLAGEN	ECM-Receptor	KEGG: hsa04512
ESC	ESC	COL1A2	CD44	0.014675	0.03	COL1A2_CD44	COL1A2 - CD44	COLLAGEN	ECM-Receptor	KEGG: hsa04512
SMC	SMC	COL4A1	CD44	0.020427	0	COL4A1_CD44	COL4A1 - CD44	COLLAGEN	ECM-Receptor	KEGG: hsa04512
FB	SMC	COL4A1	CD44	0.0033048	0	COL4A1_CD44	COL4A1 - CD44	COLLAGEN	ECM-Receptor	KEGG: hsa04512
EC	SMC	COL4A1	CD44	0.0133811	0	COL4A1_CD44	COL4A1 - CD44	COLLAGEN	ECM-Receptor	KEGG: hsa04512
ESC	SMC	COL4A1	CD44	0.0187179	0	COL4A1_CD44	COL4A1 - CD44	COLLAGEN	ECM-Receptor	KEGG: hsa04512
SMC	FB	COL4A1	CD44	0.0147952	0	COL4A1_CD44	COL4A1 - CD44	COLLAGEN	ECM-Receptor	KEGG: hsa04512
FB	FB	COL4A1	CD44	0.00238217	0.01	COL4A1_CD44	COL4A1 - CD44	COLLAGEN	ECM-Receptor	KEGG: hsa04512
EC	FB	COL4A1	CD44	0.00967267	0	COL4A1_CD44	COL4A1 - CD44	COLLAGEN	ECM-Receptor	KEGG: hsa04512
ESC	FB	COL4A1	CD44	0.0135508	0	COL4A1_CD44	COL4A1 - CD44	COLLAGEN	ECM-Receptor	KEGG: hsa04512
SMC	MDC	COL4A1	CD44	0.0480944	0	COL4A1_CD44	COL4A1 - CD44	COLLAGEN	ECM-Receptor	KEGG: hsa04512
FB	MDC	COL4A1	CD44	0.00796968	0	COL4A1_CD44	COL4A1 - CD44	COLLAGEN	ECM-Receptor	KEGG: hsa04512
EC	MDC	COL4A1	CD44	0.0318151	0	COL4A1_CD44	COL4A1 - CD44	COLLAGEN	ECM-Receptor	KEGG: hsa04512
ESC	MDC	COL4A1	CD44	0.0441749	0	COL4A1_CD44	COL4A1 - CD44	COLLAGEN	ECM-Receptor	KEGG: hsa04512
SMC	TC	COL4A1	CD44	0.0235172	0	COL4A1_CD44	COL4A1 - CD44	COLLAGEN	ECM-Receptor	KEGG: hsa04512
EC	TC	COL4A1	CD44	0.0154221	0	COL4A1_CD44	COL4A1 - CD44	COLLAGEN	ECM-Receptor	KEGG: hsa04512
ESC	TC	COL4A1	CD44	0.0215553	0	COL4A1_CD44	COL4A1 - CD44	COLLAGEN	ECM-Receptor	KEGG: hsa04512
SMC	ESC	COL4A1	CD44	0.010265	0.01	COL4A1_CD44	COL4A1 - CD44	COLLAGEN	ECM-Receptor	KEGG: hsa04512
ESC	ESC	COL4A1	CD44	0.00939803	0.01	COL4A1_CD44	COL4A1 - CD44	COLLAGEN	ECM-Receptor	KEGG: hsa04512
SMC	SMC	COL4A2	CD44	0.00593189	0	COL4A2_CD44	COL4A2 - CD44	COLLAGEN	ECM-Receptor	KEGG: hsa04512
EC	SMC	COL4A2	CD44	0.00431973	0	COL4A2_CD44	COL4A2 - CD44	COLLAGEN	ECM-Receptor	KEGG: hsa04512
ESC	SMC	COL4A2	CD44	0.0057565	0	COL4A2_CD44	COL4A2 - CD44	COLLAGEN	ECM-Receptor	KEGG: hsa04512
SMC	FB	COL4A2	CD44	0.00427899	0	COL4A2_CD44	COL4A2 - CD44	COLLAGEN	ECM-Receptor	KEGG: hsa04512
EC	FB	COL4A2	CD44	0.00311464	0	COL4A2_CD44	COL4A2 - CD44	COLLAGEN	ECM-Receptor	KEGG: hsa04512
ESC	FB	COL4A2	CD44	0.00415227	0	COL4A2_CD44	COL4A2 - CD44	COLLAGEN	ECM-Receptor	KEGG: hsa04512
SMC	MDC	COL4A2	CD44	0.014252	0	COL4A2_CD44	COL4A2 - CD44	COLLAGEN	ECM-Receptor	KEGG: hsa04512
EC	MDC	COL4A2	CD44	0.0104023	0	COL4A2_CD44	COL4A2 - CD44	COLLAGEN	ECM-Receptor	KEGG: hsa04512
ESC	MDC	COL4A2	CD44	0.013834	0	COL4A2_CD44	COL4A2 - CD44	COLLAGEN	ECM-Receptor	KEGG: hsa04512
SMC	TC	COL4A2	CD44	0.00684459	0	COL4A2_CD44	COL4A2 - CD44	COLLAGEN	ECM-Receptor	KEGG: hsa04512
EC	TC	COL4A2	CD44	0.00498562	0	COL4A2_CD44	COL4A2 - CD44	COLLAGEN	ECM-Receptor	KEGG: hsa04512
ESC	TC	COL4A2	CD44	0.0066424	0	COL4A2_CD44	COL4A2 - CD44	COLLAGEN	ECM-Receptor	KEGG: hsa04512
SMC	ESC	COL4A2	CD44	0.00295913	0.03	COL4A2_CD44	COL4A2 - CD44	COLLAGEN	ECM-Receptor	KEGG: hsa04512
SMC	SMC	COL6A2	CD44	0.0046406	0	COL6A2_CD44	COL6A2 - CD44	COLLAGEN	ECM-Receptor	KEGG: hsa04512
FB	SMC	COL6A2	CD44	0.0266167	0	COL6A2_CD44	COL6A2 - CD44	COLLAGEN	ECM-Receptor	KEGG: hsa04512
ESC	SMC	COL6A2	CD44	0.00610995	0	COL6A2_CD44	COL6A2 - CD44	COLLAGEN	ECM-Receptor	KEGG: hsa04512
SMC	FB	COL6A2	CD44	0.0033463	0	COL6A2_CD44	COL6A2 - CD44	COLLAGEN	ECM-Receptor	KEGG: hsa04512
FB	FB	COL6A2	CD44	0.019312	0	COL6A2_CD44	COL6A2 - CD44	COLLAGEN	ECM-Receptor	KEGG: hsa04512
ESC	FB	COL6A2	CD44	0.00440765	0	COL6A2_CD44	COL6A2 - CD44	COLLAGEN	ECM-Receptor	KEGG: hsa04512
SMC	MDC	COL6A2	CD44	0.0111699	0	COL6A2_CD44	COL6A2 - CD44	COLLAGEN	ECM-Receptor	KEGG: hsa04512
FB	MDC	COL6A2	CD44	0.0621359	0	COL6A2_CD44	COL6A2 - CD44	COLLAGEN	ECM-Receptor	KEGG: hsa04512
ESC	MDC	COL6A2	CD44	0.0146761	0	COL6A2_CD44	COL6A2 - CD44	COLLAGEN	ECM-Receptor	KEGG: hsa04512
SMC	TC	COL6A2	CD44	0.00535569	0	COL6A2_CD44	COL6A2 - CD44	COLLAGEN	ECM-Receptor	KEGG: hsa04512
FB	TC	COL6A2	CD44	0.030614	0	COL6A2_CD44	COL6A2 - CD44	COLLAGEN	ECM-Receptor	KEGG: hsa04512
ESC	TC	COL6A2	CD44	0.00704985	0	COL6A2_CD44	COL6A2 - CD44	COLLAGEN	ECM-Receptor	KEGG: hsa04512
FB	ESC	COL6A2	CD44	0.0134177	0	COL6A2_CD44	COL6A2 - CD44	COLLAGEN	ECM-Receptor	KEGG: hsa04512
SMC	SMC	COL6A3	CD44	0.00430514	0	COL6A3_CD44	COL6A3 - CD44	COLLAGEN	ECM-Receptor	KEGG: hsa04512
FB	SMC	COL6A3	CD44	0.033497	0	COL6A3_CD44	COL6A3 - CD44	COLLAGEN	ECM-Receptor	KEGG: hsa04512
ESC	SMC	COL6A3	CD44	0.0056189	0	COL6A3_CD44	COL6A3 - CD44	COLLAGEN	ECM-Receptor	KEGG: hsa04512
SMC	FB	COL6A3	CD44	0.00310411	0	COL6A3_CD44	COL6A3 - CD44	COLLAGEN	ECM-Receptor	KEGG: hsa04512
FB	FB	COL6A3	CD44	0.0243513	0	COL6A3_CD44	COL6A3 - CD44	COLLAGEN	ECM-Receptor	KEGG: hsa04512
ESC	FB	COL6A3	CD44	0.00405286	0	COL6A3_CD44	COL6A3 - CD44	COLLAGEN	ECM-Receptor	KEGG: hsa04512
SMC	MDC	COL6A3	CD44	0.0103674	0	COL6A3_CD44	COL6A3 - CD44	COLLAGEN	ECM-Receptor	KEGG: hsa04512
FB	MDC	COL6A3	CD44	0.0774672	0	COL6A3_CD44	COL6A3 - CD44	COLLAGEN	ECM-Receptor	KEGG: hsa04512
ESC	MDC	COL6A3	CD44	0.013506	0	COL6A3_CD44	COL6A3 - CD44	COLLAGEN	ECM-Receptor	KEGG: hsa04512
SMC	TC	COL6A3	CD44	0.0049688	0	COL6A3_CD44	COL6A3 - CD44	COLLAGEN	ECM-Receptor	KEGG: hsa04512
FB	TC	COL6A3	CD44	0.0384868	0	COL6A3_CD44	COL6A3 - CD44	COLLAGEN	ECM-Receptor	KEGG: hsa04512
ESC	TC	COL6A3	CD44	0.00648376	0	COL6A3_CD44	COL6A3 - CD44	COLLAGEN	ECM-Receptor	KEGG: hsa04512
FB	ESC	COL6A3	CD44	0.0169455	0	COL6A3_CD44	COL6A3 - CD44	COLLAGEN	ECM-Receptor	KEGG: hsa04512
FB	SMC	LAMA2	CD44	0.00951504	0	LAMA2_CD44	LAMA2 - CD44	LAMININ	ECM-Receptor	KEGG: hsa04512
FB	FB	LAMA2	CD44	0.0068706	0	LAMA2_CD44	LAMA2 - CD44	LAMININ	ECM-Receptor	KEGG: hsa04512
FB	MDC	LAMA2	CD44	0.0227459	0	LAMA2_CD44	LAMA2 - CD44	LAMININ	ECM-Receptor	KEGG: hsa04512
FB	TC	LAMA2	CD44	0.010973	0	LAMA2_CD44	LAMA2 - CD44	LAMININ	ECM-Receptor	KEGG: hsa04512
FB	ESC	LAMA2	CD44	0.00475517	0	LAMA2_CD44	LAMA2 - CD44	LAMININ	ECM-Receptor	KEGG: hsa04512
KE	SMC	LAMA3	CD44	0.00213247	0	LAMA3_CD44	LAMA3 - CD44	LAMININ	ECM-Receptor	KEGG: hsa04512
KE	FB	LAMA3	CD44	0.00153662	0	LAMA3_CD44	LAMA3 - CD44	LAMININ	ECM-Receptor	KEGG: hsa04512
KE	MDC	LAMA3	CD44	0.00515109	0	LAMA3_CD44	LAMA3 - CD44	LAMININ	ECM-Receptor	KEGG: hsa04512
KE	TC	LAMA3	CD44	0.00246202	0	LAMA3_CD44	LAMA3 - CD44	LAMININ	ECM-Receptor	KEGG: hsa04512
KE	ESC	LAMA3	CD44	0.00106175	0	LAMA3_CD44	LAMA3 - CD44	LAMININ	ECM-Receptor	KEGG: hsa04512
SMC	SMC	LAMA4	CD44	0.00599999	0	LAMA4_CD44	LAMA4 - CD44	LAMININ	ECM-Receptor	KEGG: hsa04512
FB	SMC	LAMA4	CD44	0.00452778	0	LAMA4_CD44	LAMA4 - CD44	LAMININ	ECM-Receptor	KEGG: hsa04512
ESC	SMC	LAMA4	CD44	0.00508623	0	LAMA4_CD44	LAMA4 - CD44	LAMININ	ECM-Receptor	KEGG: hsa04512
SMC	FB	LAMA4	CD44	0.00432819	0	LAMA4_CD44	LAMA4 - CD44	LAMININ	ECM-Receptor	KEGG: hsa04512
FB	FB	LAMA4	CD44	0.00326485	0	LAMA4_CD44	LAMA4 - CD44	LAMININ	ECM-Receptor	KEGG: hsa04512
ESC	FB	LAMA4	CD44	0.0036681	0	LAMA4_CD44	LAMA4 - CD44	LAMININ	ECM-Receptor	KEGG: hsa04512
SMC	MDC	LAMA4	CD44	0.0144142	0	LAMA4_CD44	LAMA4 - CD44	LAMININ	ECM-Receptor	KEGG: hsa04512
FB	MDC	LAMA4	CD44	0.0109001	0	LAMA4_CD44	LAMA4 - CD44	LAMININ	ECM-Receptor	KEGG: hsa04512
ESC	MDC	LAMA4	CD44	0.0122348	0	LAMA4_CD44	LAMA4 - CD44	LAMININ	ECM-Receptor	KEGG: hsa04512
SMC	TC	LAMA4	CD44	0.0069231	0	LAMA4_CD44	LAMA4 - CD44	LAMININ	ECM-Receptor	KEGG: hsa04512
FB	TC	LAMA4	CD44	0.00522558	0	LAMA4_CD44	LAMA4 - CD44	LAMININ	ECM-Receptor	KEGG: hsa04512
ESC	TC	LAMA4	CD44	0.00586958	0	LAMA4_CD44	LAMA4 - CD44	LAMININ	ECM-Receptor	KEGG: hsa04512
SMC	ESC	LAMA4	CD44	0.0029932	0.03	LAMA4_CD44	LAMA4 - CD44	LAMININ	ECM-Receptor	KEGG: hsa04512
FB	SMC	LAMB1	CD44	0.0123856	0	LAMB1_CD44	LAMB1 - CD44	LAMININ	ECM-Receptor	KEGG: hsa04512
KE	SMC	LAMB1	CD44	0.00351611	0	LAMB1_CD44	LAMB1 - CD44	LAMININ	ECM-Receptor	KEGG: hsa04512
ESC	SMC	LAMB1	CD44	0.00556777	0	LAMB1_CD44	LAMB1 - CD44	LAMININ	ECM-Receptor	KEGG: hsa04512
FB	FB	LAMB1	CD44	0.00895061	0	LAMB1_CD44	LAMB1 - CD44	LAMININ	ECM-Receptor	KEGG: hsa04512
KE	FB	LAMB1	CD44	0.00253464	0	LAMB1_CD44	LAMB1 - CD44	LAMININ	ECM-Receptor	KEGG: hsa04512
ESC	FB	LAMB1	CD44	0.00401592	0	LAMB1_CD44	LAMB1 - CD44	LAMININ	ECM-Receptor	KEGG: hsa04512
FB	MDC	LAMB1	CD44	0.0294893	0	LAMB1_CD44	LAMB1 - CD44	LAMININ	ECM-Receptor	KEGG: hsa04512
KE	MDC	LAMB1	CD44	0.00847673	0	LAMB1_CD44	LAMB1 - CD44	LAMININ	ECM-Receptor	KEGG: hsa04512
ESC	MDC	LAMB1	CD44	0.0133841	0	LAMB1_CD44	LAMB1 - CD44	LAMININ	ECM-Receptor	KEGG: hsa04512
FB	TC	LAMB1	CD44	0.0142771	0	LAMB1_CD44	LAMB1 - CD44	LAMININ	ECM-Receptor	KEGG: hsa04512
KE	TC	LAMB1	CD44	0.00405863	0	LAMB1_CD44	LAMB1 - CD44	LAMININ	ECM-Receptor	KEGG: hsa04512
ESC	TC	LAMB1	CD44	0.00642481	0	LAMB1_CD44	LAMB1 - CD44	LAMININ	ECM-Receptor	KEGG: hsa04512
FB	ESC	LAMB1	CD44	0.00619875	0	LAMB1_CD44	LAMB1 - CD44	LAMININ	ECM-Receptor	KEGG: hsa04512
KE	ESC	LAMB1	CD44	0.00175188	0	LAMB1_CD44	LAMB1 - CD44	LAMININ	ECM-Receptor	KEGG: hsa04512
ESC	ESC	LAMB1	CD44	0.00277698	0	LAMB1_CD44	LAMB1 - CD44	LAMININ	ECM-Receptor	KEGG: hsa04512
SMC	SMC	LAMB2	CD44	0.00501053	0	LAMB2_CD44	LAMB2 - CD44	LAMININ	ECM-Receptor	KEGG: hsa04512
FB	SMC	LAMB2	CD44	0.00379674	0	LAMB2_CD44	LAMB2 - CD44	LAMININ	ECM-Receptor	KEGG: hsa04512
EC	SMC	LAMB2	CD44	0.00248173	0	LAMB2_CD44	LAMB2 - CD44	LAMININ	ECM-Receptor	KEGG: hsa04512
ESC	SMC	LAMB2	CD44	0.00407436	0	LAMB2_CD44	LAMB2 - CD44	LAMININ	ECM-Receptor	KEGG: hsa04512
SMC	FB	LAMB2	CD44	0.00361343	0	LAMB2_CD44	LAMB2 - CD44	LAMININ	ECM-Receptor	KEGG: hsa04512
FB	FB	LAMB2	CD44	0.00273715	0	LAMB2_CD44	LAMB2 - CD44	LAMININ	ECM-Receptor	KEGG: hsa04512
EC	FB	LAMB2	CD44	0.00178847	0	LAMB2_CD44	LAMB2 - CD44	LAMININ	ECM-Receptor	KEGG: hsa04512
ESC	FB	LAMB2	CD44	0.00293752	0	LAMB2_CD44	LAMB2 - CD44	LAMININ	ECM-Receptor	KEGG: hsa04512
SMC	MDC	LAMB2	CD44	0.012054	0	LAMB2_CD44	LAMB2 - CD44	LAMININ	ECM-Receptor	KEGG: hsa04512
FB	MDC	LAMB2	CD44	0.00914963	0	LAMB2_CD44	LAMB2 - CD44	LAMININ	ECM-Receptor	KEGG: hsa04512
EC	MDC	LAMB2	CD44	0.00599179	0	LAMB2_CD44	LAMB2 - CD44	LAMININ	ECM-Receptor	KEGG: hsa04512
ESC	MDC	LAMB2	CD44	0.00981481	0	LAMB2_CD44	LAMB2 - CD44	LAMININ	ECM-Receptor	KEGG: hsa04512
SMC	TC	LAMB2	CD44	0.00578229	0	LAMB2_CD44	LAMB2 - CD44	LAMININ	ECM-Receptor	KEGG: hsa04512
FB	TC	LAMB2	CD44	0.00438236	0	LAMB2_CD44	LAMB2 - CD44	LAMININ	ECM-Receptor	KEGG: hsa04512
EC	TC	LAMB2	CD44	0.00286511	0.01	LAMB2_CD44	LAMB2 - CD44	LAMININ	ECM-Receptor	KEGG: hsa04512
ESC	TC	LAMB2	CD44	0.0047026	0	LAMB2_CD44	LAMB2 - CD44	LAMININ	ECM-Receptor	KEGG: hsa04512
SMC	ESC	LAMB2	CD44	0.00249835	0.03	LAMB2_CD44	LAMB2 - CD44	LAMININ	ECM-Receptor	KEGG: hsa04512
SMC	SMC	LAMC1	CD44	0.0110674	0	LAMC1_CD44	LAMC1 - CD44	LAMININ	ECM-Receptor	KEGG: hsa04512
FB	SMC	LAMC1	CD44	0.00995018	0	LAMC1_CD44	LAMC1 - CD44	LAMININ	ECM-Receptor	KEGG: hsa04512
EC	SMC	LAMC1	CD44	0.00330352	0	LAMC1_CD44	LAMC1 - CD44	LAMININ	ECM-Receptor	KEGG: hsa04512
ESC	SMC	LAMC1	CD44	0.00509861	0	LAMC1_CD44	LAMC1 - CD44	LAMININ	ECM-Receptor	KEGG: hsa04512
SMC	FB	LAMC1	CD44	0.007995	0	LAMC1_CD44	LAMC1 - CD44	LAMININ	ECM-Receptor	KEGG: hsa04512
FB	FB	LAMC1	CD44	0.00718569	0	LAMC1_CD44	LAMC1 - CD44	LAMININ	ECM-Receptor	KEGG: hsa04512
EC	FB	LAMC1	CD44	0.00238125	0	LAMC1_CD44	LAMC1 - CD44	LAMININ	ECM-Receptor	KEGG: hsa04512
ESC	FB	LAMC1	CD44	0.00367704	0	LAMC1_CD44	LAMC1 - CD44	LAMININ	ECM-Receptor	KEGG: hsa04512
SMC	MDC	LAMC1	CD44	0.0263993	0	LAMC1_CD44	LAMC1 - CD44	LAMININ	ECM-Receptor	KEGG: hsa04512
FB	MDC	LAMC1	CD44	0.0237716	0	LAMC1_CD44	LAMC1 - CD44	LAMININ	ECM-Receptor	KEGG: hsa04512
EC	MDC	LAMC1	CD44	0.00796661	0	LAMC1_CD44	LAMC1 - CD44	LAMININ	ECM-Receptor	KEGG: hsa04512
ESC	MDC	LAMC1	CD44	0.0122644	0	LAMC1_CD44	LAMC1 - CD44	LAMININ	ECM-Receptor	KEGG: hsa04512
SMC	TC	LAMC1	CD44	0.0127601	0	LAMC1_CD44	LAMC1 - CD44	LAMININ	ECM-Receptor	KEGG: hsa04512
FB	TC	LAMC1	CD44	0.011474	0	LAMC1_CD44	LAMC1 - CD44	LAMININ	ECM-Receptor	KEGG: hsa04512
EC	TC	LAMC1	CD44	0.00381336	0.01	LAMC1_CD44	LAMC1 - CD44	LAMININ	ECM-Receptor	KEGG: hsa04512
ESC	TC	LAMC1	CD44	0.00588386	0	LAMC1_CD44	LAMC1 - CD44	LAMININ	ECM-Receptor	KEGG: hsa04512
SMC	ESC	LAMC1	CD44	0.0055353	0	LAMC1_CD44	LAMC1 - CD44	LAMININ	ECM-Receptor	KEGG: hsa04512
FB	ESC	LAMC1	CD44	0.00497373	0	LAMC1_CD44	LAMC1 - CD44	LAMININ	ECM-Receptor	KEGG: hsa04512
SMC	KE	COL1A1	SDC1	0.00319324	0	COL1A1_SDC1	COL1A1 - SDC1	COLLAGEN	ECM-Receptor	KEGG: hsa04512
FB	KE	COL1A1	SDC1	0.0370888	0	COL1A1_SDC1	COL1A1 - SDC1	COLLAGEN	ECM-Receptor	KEGG: hsa04512
EC	KE	COL1A1	SDC1	0.00241233	0	COL1A1_SDC1	COL1A1 - SDC1	COLLAGEN	ECM-Receptor	KEGG: hsa04512
MDC	KE	COL1A1	SDC1	0.00261188	0	COL1A1_SDC1	COL1A1 - SDC1	COLLAGEN	ECM-Receptor	KEGG: hsa04512
TC	KE	COL1A1	SDC1	0.00313137	0	COL1A1_SDC1	COL1A1 - SDC1	COLLAGEN	ECM-Receptor	KEGG: hsa04512
KE	KE	COL1A1	SDC1	0.00236777	0	COL1A1_SDC1	COL1A1 - SDC1	COLLAGEN	ECM-Receptor	KEGG: hsa04512
ESC	KE	COL1A1	SDC1	0.0104564	0	COL1A1_SDC1	COL1A1 - SDC1	COLLAGEN	ECM-Receptor	KEGG: hsa04512
SMC	KE	COL1A2	SDC1	0.0105832	0	COL1A2_SDC1	COL1A2 - SDC1	COLLAGEN	ECM-Receptor	KEGG: hsa04512
FB	KE	COL1A2	SDC1	0.0404393	0	COL1A2_SDC1	COL1A2 - SDC1	COLLAGEN	ECM-Receptor	KEGG: hsa04512
EC	KE	COL1A2	SDC1	0.00742427	0	COL1A2_SDC1	COL1A2 - SDC1	COLLAGEN	ECM-Receptor	KEGG: hsa04512
MDC	KE	COL1A2	SDC1	0.00864073	0	COL1A2_SDC1	COL1A2 - SDC1	COLLAGEN	ECM-Receptor	KEGG: hsa04512
TC	KE	COL1A2	SDC1	0.00995627	0	COL1A2_SDC1	COL1A2 - SDC1	COLLAGEN	ECM-Receptor	KEGG: hsa04512
KE	KE	COL1A2	SDC1	0.0077547	0	COL1A2_SDC1	COL1A2 - SDC1	COLLAGEN	ECM-Receptor	KEGG: hsa04512
ESC	KE	COL1A2	SDC1	0.0169652	0	COL1A2_SDC1	COL1A2 - SDC1	COLLAGEN	ECM-Receptor	KEGG: hsa04512
SMC	KE	COL4A1	SDC1	0.0118753	0	COL4A1_SDC1	COL4A1 - SDC1	COLLAGEN	ECM-Receptor	KEGG: hsa04512
FB	KE	COL4A1	SDC1	0.0019073	0	COL4A1_SDC1	COL4A1 - SDC1	COLLAGEN	ECM-Receptor	KEGG: hsa04512
EC	KE	COL4A1	SDC1	0.00775577	0	COL4A1_SDC1	COL4A1 - SDC1	COLLAGEN	ECM-Receptor	KEGG: hsa04512
ESC	KE	COL4A1	SDC1	0.0108738	0	COL4A1_SDC1	COL4A1 - SDC1	COLLAGEN	ECM-Receptor	KEGG: hsa04512
SMC	KE	COL4A2	SDC1	0.00342729	0	COL4A2_SDC1	COL4A2 - SDC1	COLLAGEN	ECM-Receptor	KEGG: hsa04512
EC	KE	COL4A2	SDC1	0.00249412	0	COL4A2_SDC1	COL4A2 - SDC1	COLLAGEN	ECM-Receptor	KEGG: hsa04512
ESC	KE	COL4A2	SDC1	0.00332571	0	COL4A2_SDC1	COL4A2 - SDC1	COLLAGEN	ECM-Receptor	KEGG: hsa04512
SMC	KE	COL6A2	SDC1	0.00267975	0	COL6A2_SDC1	COL6A2 - SDC1	COLLAGEN	ECM-Receptor	KEGG: hsa04512
FB	KE	COL6A2	SDC1	0.0155147	0	COL6A2_SDC1	COL6A2 - SDC1	COLLAGEN	ECM-Receptor	KEGG: hsa04512
ESC	KE	COL6A2	SDC1	0.00353043	0	COL6A2_SDC1	COL6A2 - SDC1	COLLAGEN	ECM-Receptor	KEGG: hsa04512
SMC	KE	COL6A3	SDC1	0.00248568	0	COL6A3_SDC1	COL6A3 - SDC1	COLLAGEN	ECM-Receptor	KEGG: hsa04512
FB	KE	COL6A3	SDC1	0.019583	0	COL6A3_SDC1	COL6A3 - SDC1	COLLAGEN	ECM-Receptor	KEGG: hsa04512
ESC	KE	COL6A3	SDC1	0.00324602	0	COL6A3_SDC1	COL6A3 - SDC1	COLLAGEN	ECM-Receptor	KEGG: hsa04512
SMC	KE	FN1	SDC1	0.00397152	0	FN1_SDC1	FN1 - SDC1	FN1	ECM-Receptor	KEGG: hsa04512
FB	KE	FN1	SDC1	0.0189974	0	FN1_SDC1	FN1 - SDC1	FN1	ECM-Receptor	KEGG: hsa04512
ESC	KE	FN1	SDC1	0.00402731	0	FN1_SDC1	FN1 - SDC1	FN1	ECM-Receptor	KEGG: hsa04512
FB	KE	TNXB	SDC1	0.00254642	0	TNXB_SDC1	TNXB - SDC1	TENASCIN	ECM-Receptor	KEGG: hsa04512
FB	KE	THBS1	SDC1	0.00220474	0	THBS1_SDC1	THBS1 - SDC1	THBS	ECM-Receptor	KEGG: hsa04512
EC	KE	THBS1	SDC1	0.00319795	0	THBS1_SDC1	THBS1 - SDC1	THBS	ECM-Receptor	KEGG: hsa04512
KE	KE	THBS1	SDC1	0.000772097	0	THBS1_SDC1	THBS1 - SDC1	THBS	ECM-Receptor	KEGG: hsa04512
FB	KE	THBS2	SDC1	0.00879646	0	THBS2_SDC1	THBS2 - SDC1	THBS	ECM-Receptor	KEGG: hsa04512
FB	ESC	THBS1	CD47	0.00131138	0	THBS1_CD47	THBS1 - CD47	THBS	ECM-Receptor	KEGG: hsa04512
EC	ESC	THBS1	CD47	0.00190291	0	THBS1_CD47	THBS1 - CD47	THBS	ECM-Receptor	KEGG: hsa04512
KE	ESC	THBS1	CD47	0.000458976	0	THBS1_CD47	THBS1 - CD47	THBS	ECM-Receptor	KEGG: hsa04512
FB	ESC	THBS2	CD47	0.00524618	0	THBS2_CD47	THBS2 - CD47	THBS	ECM-Receptor	KEGG: hsa04512
FB	ESC	HSPG2	DAG1	0.00466818	0	HSPG2_DAG1	HSPG2 - DAG1	HSPG	ECM-Receptor	KEGG: hsa04512
EC	ESC	HSPG2	DAG1	0.00187511	0	HSPG2_DAG1	HSPG2 - DAG1	HSPG	ECM-Receptor	KEGG: hsa04512
ESC	ESC	HSPG2	DAG1	0.0025231	0	HSPG2_DAG1	HSPG2 - DAG1	HSPG	ECM-Receptor	KEGG: hsa04512
FB	ESC	LAMA2	DAG1	0.00517929	0	LAMA2_DAG1	LAMA2 - DAG1	LAMININ	ECM-Receptor	KEGG: hsa04512
KE	ESC	LAMA3	DAG1	0.00115683	0	LAMA3_DAG1	LAMA3 - DAG1	LAMININ	ECM-Receptor	KEGG: hsa04512
SMC	ESC	LAMA4	DAG1	0.00326068	0	LAMA4_DAG1	LAMA4 - DAG1	LAMININ	ECM-Receptor	KEGG: hsa04512
FB	ESC	LAMA4	DAG1	0.00245895	0	LAMA4_DAG1	LAMA4 - DAG1	LAMININ	ECM-Receptor	KEGG: hsa04512
ESC	ESC	LAMA4	DAG1	0.00276294	0	LAMA4_DAG1	LAMA4 - DAG1	LAMININ	ECM-Receptor	KEGG: hsa04512
FB	ESC	LAMB1	DAG1	0.00675074	0	LAMB1_DAG1	LAMB1 - DAG1	LAMININ	ECM-Receptor	KEGG: hsa04512
KE	ESC	LAMB1	DAG1	0.00190864	0	LAMB1_DAG1	LAMB1 - DAG1	LAMININ	ECM-Receptor	KEGG: hsa04512
ESC	ESC	LAMB1	DAG1	0.00302519	0	LAMB1_DAG1	LAMB1 - DAG1	LAMININ	ECM-Receptor	KEGG: hsa04512
SMC	ESC	LAMB2	DAG1	0.00272173	0	LAMB2_DAG1	LAMB2 - DAG1	LAMININ	ECM-Receptor	KEGG: hsa04512
FB	ESC	LAMB2	DAG1	0.00206124	0	LAMB2_DAG1	LAMB2 - DAG1	LAMININ	ECM-Receptor	KEGG: hsa04512
EC	ESC	LAMB2	DAG1	0.00134651	0	LAMB2_DAG1	LAMB2 - DAG1	LAMININ	ECM-Receptor	KEGG: hsa04512
ESC	ESC	LAMB2	DAG1	0.00221224	0	LAMB2_DAG1	LAMB2 - DAG1	LAMININ	ECM-Receptor	KEGG: hsa04512
SMC	ESC	LAMC1	DAG1	0.00602858	0	LAMC1_DAG1	LAMC1 - DAG1	LAMININ	ECM-Receptor	KEGG: hsa04512
FB	ESC	LAMC1	DAG1	0.00541723	0	LAMC1_DAG1	LAMC1 - DAG1	LAMININ	ECM-Receptor	KEGG: hsa04512
EC	ESC	LAMC1	DAG1	0.00179307	0	LAMC1_DAG1	LAMC1 - DAG1	LAMININ	ECM-Receptor	KEGG: hsa04512
ESC	ESC	LAMC1	DAG1	0.00276968	0	LAMC1_DAG1	LAMC1 - DAG1	LAMININ	ECM-Receptor	KEGG: hsa04512
MDC	FB	ADGRE5	CD55	0.00429093	0	ADGRE5_CD55	ADGRE5 - CD55	ADGRE5	Cell-Cell Contact	PMID: 11297558
TC	FB	ADGRE5	CD55	0.0025502	0	ADGRE5_CD55	ADGRE5 - CD55	ADGRE5	Cell-Cell Contact	PMID: 11297558
SMC	EC	APP	CD74	0.0909001	0	APP_CD74	APP - CD74	APP	Cell-Cell Contact	PMID: 19849849
FB	EC	APP	CD74	0.0230083	0	APP_CD74	APP - CD74	APP	Cell-Cell Contact	PMID: 19849849
EC	EC	APP	CD74	0.0930455	0	APP_CD74	APP - CD74	APP	Cell-Cell Contact	PMID: 19849849
MDC	EC	APP	CD74	0.0582723	0	APP_CD74	APP - CD74	APP	Cell-Cell Contact	PMID: 19849849
KE	EC	APP	CD74	0.0816959	0	APP_CD74	APP - CD74	APP	Cell-Cell Contact	PMID: 19849849
ESC	EC	APP	CD74	0.0863443	0	APP_CD74	APP - CD74	APP	Cell-Cell Contact	PMID: 19849849
SMC	MDC	APP	CD74	0.134843	0	APP_CD74	APP - CD74	APP	Cell-Cell Contact	PMID: 19849849
FB	MDC	APP	CD74	0.0354094	0	APP_CD74	APP - CD74	APP	Cell-Cell Contact	PMID: 19849849
EC	MDC	APP	CD74	0.137869	0	APP_CD74	APP - CD74	APP	Cell-Cell Contact	PMID: 19849849
MDC	MDC	APP	CD74	0.0879689	0	APP_CD74	APP - CD74	APP	Cell-Cell Contact	PMID: 19849849
KE	MDC	APP	CD74	0.121786	0	APP_CD74	APP - CD74	APP	Cell-Cell Contact	PMID: 19849849
ESC	MDC	APP	CD74	0.128396	0	APP_CD74	APP - CD74	APP	Cell-Cell Contact	PMID: 19849849
SMC	TC	APP	CD74	0.0194821	0	APP_CD74	APP - CD74	APP	Cell-Cell Contact	PMID: 19849849
EC	TC	APP	CD74	0.0199789	0	APP_CD74	APP - CD74	APP	Cell-Cell Contact	PMID: 19849849
KE	TC	APP	CD74	0.0173712	0.01	APP_CD74	APP - CD74	APP	Cell-Cell Contact	PMID: 19849849
ESC	TC	APP	CD74	0.0184331	0.01	APP_CD74	APP - CD74	APP	Cell-Cell Contact	PMID: 19849849
FB	FB	CADM3	CADM3	0.00318842	0	CADM3_CADM3	CADM3 - CADM3	CADM	Cell-Cell Contact	KEGG: hsa04514
MDC	MDC	PTPRC	MRC1	0.00545511	0	PTPRC_MRC1	PTPRC - MRC1	CD45	Cell-Cell Contact	PMID: 27601670; PMID: 10575006
TC	MDC	PTPRC	MRC1	0.0212946	0	PTPRC_MRC1	PTPRC - MRC1	CD45	Cell-Cell Contact	PMID: 27601670; PMID: 10575006
SMC	EC	CD46	JAG1	0.00179837	0	CD46_JAG1	CD46 - JAG1	CD46	Cell-Cell Contact	PMID: 23086448
FB	EC	CD46	JAG1	0.000568306	0	CD46_JAG1	CD46 - JAG1	CD46	Cell-Cell Contact	PMID: 23086448
EC	EC	CD46	JAG1	0.00164194	0	CD46_JAG1	CD46 - JAG1	CD46	Cell-Cell Contact	PMID: 23086448
MDC	EC	CD46	JAG1	0.00378274	0	CD46_JAG1	CD46 - JAG1	CD46	Cell-Cell Contact	PMID: 23086448
ESC	EC	CD46	JAG1	0.00107975	0	CD46_JAG1	CD46 - JAG1	CD46	Cell-Cell Contact	PMID: 23086448
KE	KE	CDH1	CDH1	0.00242069	0	CDH1_CDH1	CDH1 - CDH1	CDH	Cell-Cell Contact	KEGG: hsa04514
EC	EC	CDH5	CDH5	0.00502622	0	CDH5_CDH5	CDH5 - CDH5	CDH5	Cell-Cell Contact	KEGG: hsa04514
EC	EC	ESAM	ESAM	0.00132843	0	ESAM_ESAM	ESAM - ESAM	ESAM	Cell-Cell Contact	KEGG: hsa04514; PMID: 11279107
MDC	SMC	ITGB2	ICAM1	0.00337744	0	ITGB2_ICAM1	ITGB2 - ICAM1	ITGB2	Cell-Cell Contact	KEGG: hsa04514
MDC	EC	ITGB2	ICAM1	0.00996415	0	ITGB2_ICAM1	ITGB2 - ICAM1	ITGB2	Cell-Cell Contact	KEGG: hsa04514
MDC	MDC	ITGB2	ICAM1	0.00843525	0	ITGB2_ICAM1	ITGB2 - ICAM1	ITGB2	Cell-Cell Contact	KEGG: hsa04514
MDC	ESC	ITGB2	ICAM1	0.00128009	0	ITGB2_ICAM1	ITGB2 - ICAM1	ITGB2	Cell-Cell Contact	KEGG: hsa04514
EC	KE	JAM2	ITGAV_ITGB1	0.00306215	0	JAM2_ITGAV_ITGB1	JAM2 - (ITGAV+ITGB1)	JAM	Cell-Cell Contact	KEGG: hsa04514
EC	ESC	JAM2	ITGAV_ITGB1	0.00691242	0	JAM2_ITGAV_ITGB1	JAM2 - (ITGAV+ITGB1)	JAM	Cell-Cell Contact	KEGG: hsa04514
EC	EC	JAM2	JAM2	0.0052293	0	JAM2_JAM2	JAM2 - JAM2	JAM	Cell-Cell Contact	KEGG: hsa04514
FB	FB	MPZL1	MPZL1	0.00206091	0	MPZL1_MPZL1	MPZL1 - MPZL1	MPZ	Cell-Cell Contact	KEGG: hsa04514
ESC	FB	NCAM1	FGFR1	0.00195062	0	NCAM1_FGFR1	NCAM1 - FGFR1	NCAM	Cell-Cell Contact	PMID: 12791257
ESC	ESC	NCAM1	NCAM1	0.0012425	0	NCAM1_NCAM1	NCAM1 - NCAM1	NCAM	Cell-Cell Contact	KEGG: hsa04514
EC	FB	DLL4	NOTCH2	0.00209185	0	DLL4_NOTCH2	DLL4 - NOTCH2	NOTCH	Cell-Cell Contact	PMID: 22353464
EC	FB	JAG1	NOTCH2	0.000910588	0	JAG1_NOTCH2	JAG1 - NOTCH2	NOTCH	Cell-Cell Contact	PMID: 22353464
EC	EC	PECAM1	PECAM1	0.191304	0	PECAM1_PECAM1	PECAM1 - PECAM1	PECAM1	Cell-Cell Contact	KEGG: hsa04514
MDC	EC	PECAM1	PECAM1	0.0233727	0	PECAM1_PECAM1	PECAM1 - PECAM1	PECAM1	Cell-Cell Contact	KEGG: hsa04514
EC	MDC	PECAM1	PECAM1	0.0233727	0	PECAM1_PECAM1	PECAM1 - PECAM1	PECAM1	Cell-Cell Contact	KEGG: hsa04514
EC	EC	PTPRM	PTPRM	0.00692657	0	PTPRM_PTPRM	PTPRM - PTPRM	PTPRM	Cell-Cell Contact	KEGG: hsa04514
EC	SMC	SELE	CD44	0.00455343	0	SELE_CD44	SELE - CD44	SELE	Cell-Cell Contact	PMC4571854
EC	FB	SELE	CD44	0.00328336	0	SELE_CD44	SELE - CD44	SELE	Cell-Cell Contact	PMC4571854
EC	MDC	SELE	CD44	0.0109614	0	SELE_CD44	SELE - CD44	SELE	Cell-Cell Contact	PMC4571854
EC	TC	SELE	CD44	0.00525516	0	SELE_CD44	SELE - CD44	SELE	Cell-Cell Contact	PMC4571854
EC	ESC	SELE	CD44	0.0022699	0	SELE_CD44	SELE - CD44	SELE	Cell-Cell Contact	PMC4571854
EC	FB	SELE	GLG1	0.00347554	0	SELE_GLG1	SELE - GLG1	SELE	Cell-Cell Contact	PMID: 11404363
EC	SMC	SEMA7A	ITGB1_ITGA1	0.00496128	0	SEMA7A_ITGB1_ITGA1	SEMA7A - (ITGB1+ITGA1)	SEMA7	Cell-Cell Contact	PMID: 22325954
EC	ESC	SEMA7A	ITGB1_ITGA1	0.00467789	0	SEMA7A_ITGB1_ITGA1	SEMA7A - (ITGB1+ITGA1)	SEMA7	Cell-Cell Contact	PMID: 22325954
EC	FB	SEMA7A	PLXNC1	0.00237617	0	SEMA7A_PLXNC1	SEMA7A - PLXNC1	SEMA7	Cell-Cell Contact	PMID: 27533782
EC	EC	SEMA7A	PLXNC1	0.00262518	0	SEMA7A_PLXNC1	SEMA7A - PLXNC1	SEMA7	Cell-Cell Contact	PMID: 27533782
EC	MDC	SEMA7A	PLXNC1	0.00429892	0	SEMA7A_PLXNC1	SEMA7A - PLXNC1	SEMA7	Cell-Cell Contact	PMID: 27533782
EC	KE	SEMA7A	PLXNC1	0.00261447	0	SEMA7A_PLXNC1	SEMA7A - PLXNC1	SEMA7	Cell-Cell Contact	PMID: 27533782
EC	ESC	SEMA7A	PLXNC1	0.00144916	0	SEMA7A_PLXNC1	SEMA7A - PLXNC1	SEMA7	Cell-Cell Contact	PMID: 27533782
